# Supplementary material for: Genomic Comparisons and Phenotypic Diversity of Dickeya zeae Strains Causing Bacterial Soft Rot of Banana in China
Source: Front Plant Sci. 2022 Feb 9;13:822829. doi: 10.3389/fpls.2022.822829 (PMC8864124; doi:10.3389/fpls.2022.822829)
Supplement: Supplementary file 9 [file Table_4.XLS]

## Sheet: MS1
Supplementary Table 4. Genomic features, constituent genes and gene annotations of predicated GIs within MS1.
GI NO.	Transposon	Repeats	Prophage	Island start	Island end	Length	Symbol	Locus	Gene start	Gene end	Strand	Product
GI1			P1：J417_02030-J417_02085	448334	482973	34639	lptG	J417_02020	448334	449404	1	LPS export ABC transporter permease LptG
				448334	482973	34639		J417_02030	449932	451191	1	integrase arm-type DNA-binding domain-containing protein
				448334	482973	34639		J417_02035	451231	451860	-1	DUF4276 family protein
				448334	482973	34639		J417_02040	451863	453113	-1	AAA family ATPase
				448334	482973	34639		J417_02045	454498	455379	1	site-specific integrase
				448334	482973	34639		J417_02050	455379	455582	1	AlpA family transcriptional regulator
				448334	482973	34639		J417_02055	455579	456118	1	ash family protein
				448334	482973	34639		J417_02060	456111	458156	1	AAA family ATPase
				448334	482973	34639		J417_02065	458380	458646	-1	helix-turn-helix domain-containing protein
				448334	482973	34639		J417_02070	458759	459022	1	helix-turn-helix transcriptional regulator
				448334	482973	34639		J417_02075	459166	459567	-1	hypothetical protein
				448334	482973	34639		J417_02080	459596	460075	-1	GNAT family N-acetyltransferase
				448334	482973	34639		J417_02085	460066	460338	-1	DUF1778 domain-containing protein
				448334	482973	34639		J417_02090	460842	462116	1	integrase arm-type DNA-binding domain-containing protein
				448334	482973	34639		J417_02095	462317	463191	1	HNH endonuclease
				448334	482973	34639		J417_02100	463598	464209	1	hypothetical protein
				448334	482973	34639		J417_02105	464816	467272	-1	AAA family ATPase
				448334	482973	34639		J417_02110	467318	470452	-1	type I restriction endonuclease subunit R
				448334	482973	34639		J417_02115	470468	471664	-1	DUF4268 domain-containing protein
				448334	482973	34639		J417_02120	471657	473120	-1	restriction endonuclease subunit S
				448334	482973	34639		J417_02125	473110	474817	-1	type I restriction-modification system subunit M
				448334	482973	34639		J417_02130	475032	475543	1	toll/interleukin-1 receptor domain-containing protein
				448334	482973	34639		J417_02135	475716	477155	1	GGDEF domain-containing protein
				448334	482973	34639		J417_02140	477276	478001	-1	methyltransferase domain-containing protein
				448334	482973	34639		J417_02145	478415	479269	1	pirin family protein
				448334	482973	34639		J417_02150	479466	479804	-1	hypothetical protein
				448334	482973	34639		J417_02155	480377	480760	-1	hypothetical protein
				448334	482973	34639		J417_02160	481146	481928	1	hypothetical protein
				448334	482973	34639		J417_02165	482167	482973	1	hypothetical protein
GI2				585067	589458	4391		J417_02645	585067	586068	-1	hypothetical protein
				585067	589458	4391		J417_02650	586069	587769	-1	AAA family ATPase
				585067	589458	4391		J417_02655	588300	588494	-1	hypothetical protein
				585067	589458	4391		J417_02665	588883	589458	-1	transcriptional regulator
GI3		717035-717099		716645	741426	24781		J417_03285	716645	716917	1	hypothetical protein
				716645	741426	24781		J417_03290	717197	717574	1	helix-turn-helix transcriptional regulator
				716645	741426	24781		J417_03295	718432	719835	1	mannose-1-phosphate guanylyltransferase/mannose-6-phosphate isomerase
				716645	741426	24781		J417_03300	719832	721193	1	phosphomannomutase/phosphoglucomutase
				716645	741426	24781		J417_03305	721197	721994	1	ABC transporter permease
				716645	741426	24781		J417_03310	721994	723220	1	ABC transporter ATP-binding protein
				716645	741426	24781		J417_03315	723210	724403	1	class I SAM-dependent methyltransferase
				716645	741426	24781		J417_03320	724387	728031	1	glycosyltransferase family 4 protein
				716645	741426	24781		J417_03325	728106	729782	1	hypothetical protein
				716645	741426	24781		J417_03330	729779	730186	1	GtrA family protein
				716645	741426	24781		J417_03335	730203	730904	1	glycosyltransferase family 2 protein
				716645	741426	24781		J417_03340	731077	731676	1	hypothetical protein
				716645	741426	24781		J417_03345	731627	733732	1	uridine kinase
				716645	741426	24781		J417_03350	733726	734466	1	HAD family hydrolase
				716645	741426	24781		J417_03355	734463	736181	1	hypothetical protein
				716645	741426	24781		J417_03360	736185	737186	1	class II aldolase
				716645	741426	24781	gmd	J417_03365	737230	738264	1	GDP-mannose 4,6-dehydratase
				716645	741426	24781		J417_03370	738264	739154	1	NAD-dependent epimerase/dehydratase family protein
				716645	741426	24781		J417_03375	739151	740293	1	glycosyltransferase family 4 protein
				716645	741426	24781		J417_03380	740293	741426	1	glycosyltransferase
GI4		817686-817723	P2：J417_04000-J417_04060	801126	883998	82872		J417_03630	801126	801596	-1	MEKHLA domain-containing protein
				801126	883998	82872		J417_03635	801699	801902	1	hypothetical protein
				801126	883998	82872		J417_03640	802097	802483	1	hypothetical protein
				801126	883998	82872		J417_03645	802786	803013	-1	hypothetical protein
				801126	883998	82872		J417_03650	803074	804024	-1	RNA-directed DNA polymerase
				801126	883998	82872		J417_03655	804043	804246	-1	hypothetical protein
				801126	883998	82872		J417_03660	805360	805614	-1	transcriptional regulator
				801126	883998	82872		J417_03665	806226	806744	1	Hcp family type VI secretion system effector
				801126	883998	82872	tssI	J417_03670	806858	808711	1	type VI secretion system tip protein VgrG
				801126	883998	82872		J417_03675	808725	809132	1	DUF1795 domain-containing protein
				801126	883998	82872		J417_03680	809144	813523	1	type IV secretion protein Rhs
				801126	883998	82872		J417_03685	813514	813951	1	hypothetical protein
				801126	883998	82872		J417_03690	814259	815767	1	sigma-54-dependent Fis family transcriptional regulator
				801126	883998	82872		J417_03695	815859	817655	-1	DNA-binding domain-containing protein
				801126	883998	82872		J417_03700	817992	818435	1	hypothetical protein
				801126	883998	82872		J417_03705	818723	818919	-1	helix-turn-helix transcriptional regulator
				801126	883998	82872		J417_03710	819479	819745	-1	hypothetical protein
				801126	883998	82872		J417_03715	819891	820217	1	killer suppression protein HigA
				801126	883998	82872		J417_03720	820214	821296	1	ImmA/IrrE family metallo-endopeptidase
				801126	883998	82872		J417_03725	821299	822243	-1	hypothetical protein
				801126	883998	82872		J417_03730	822243	823220	-1	thymidylate synthase
				801126	883998	82872		J417_03735	823945	825132	-1	hypothetical protein
				801126	883998	82872		J417_03740	825695	826471	-1	DUF2971 domain-containing protein
				801126	883998	82872		J417_03745	827258	827791	1	hypothetical protein
				801126	883998	82872		J417_03750	827915	828274	1	DUF3742 family protein
				801126	883998	82872		J417_03755	828281	829804	-1	conjugal transfer protein TraG
				801126	883998	82872		J417_03760	829816	830166	-1	hypothetical protein
				801126	883998	82872		J417_03765	830163	831560	-1	integrating conjugative element protein
				801126	883998	82872		J417_03770	831571	832506	-1	TIGR03756 family integrating conjugative element protein
				801126	883998	82872		J417_03775	832503	832937	-1	TIGR03757 family integrating conjugative element protein
				801126	883998	82872		J417_03780	833113	833724	1	hypothetical protein
				801126	883998	82872		J417_03785	833717	834736	1	nucleotidyl transferase AbiEii/AbiGii toxin family protein
				801126	883998	82872		J417_03790	834720	837581	-1	conjugative transfer ATPase
				801126	883998	82872		J417_03795	837581	838018	-1	TIGR03751 family conjugal transfer lipoprotein
				801126	883998	82872		J417_03800	837999	839399	-1	TIGR03752 family integrating conjugative element protein
				801126	883998	82872		J417_03805	839389	840285	-1	TIGR03749 family integrating conjugative element protein
				801126	883998	82872		J417_03810	840282	840962	-1	TIGR03746 family integrating conjugative element protein
				801126	883998	82872		J417_03815	840959	841357	-1	TIGR03750 family conjugal transfer protein
				801126	883998	82872		J417_03820	841370	841729	-1	TIGR03745 family integrating conjugative element membrane protein
				801126	883998	82872		J417_03825	841748	841981	-1	TIGR03758 family integrating conjugative element protein
				801126	883998	82872		J417_03830	841978	842364	-1	hypothetical protein
				801126	883998	82872		J417_03835	842681	843184	1	hypothetical protein
				801126	883998	82872		J417_03840	843449	844456	1	hypothetical protein
				801126	883998	82872		J417_03845	844711	845460	-1	TIGR03747 family integrating conjugative element membrane protein
				801126	883998	82872	traD	J417_03850	845457	847616	-1	type IV conjugative transfer system coupling protein TraD
				801126	883998	82872		J417_03855	847621	848160	-1	integrating conjugative element protein
				801126	883998	82872		J417_03860	848157	848747	-1	transglycosylase SLT domain-containing protein
				801126	883998	82872		J417_03865	848729	849436	-1	TIGR03759 family integrating conjugative element protein
				801126	883998	82872		J417_03870	849448	850098	-1	hypothetical protein
				801126	883998	82872		J417_03875	850095	850655	-1	integrating conjugative element protein pill, pfgi-1
				801126	883998	82872		J417_03880	851347	852252	1	hypothetical protein
				801126	883998	82872		J417_03885	852397	852537	1	helix-turn-helix domain-containing protein
				801126	883998	82872		J417_03890	852619	853512	-1	DUF3577 domain-containing protein
				801126	883998	82872		J417_03895	854019	854384	-1	DUF3085 domain-containing protein
				801126	883998	82872		J417_03900	854533	855330	-1	GTPase
				801126	883998	82872		J417_03905	855860	856618	-1	class I SAM-dependent methyltransferase
				801126	883998	82872		J417_03910	856619	857818	-1	MFS transporter
				801126	883998	82872		J417_03915	857815	858864	-1	ThiF family adenylyltransferase
				801126	883998	82872		J417_03920	859773	860024	-1	DNA cytosine methyltransferase
				801126	883998	82872		J417_03925	860550	862562	-1	DNA topoisomerase III
				801126	883998	82872		J417_03930	863034	863672	-1	NAD(P)H-binding protein
				801126	883998	82872		J417_03935	864018	864371	-1	helix-turn-helix transcriptional regulator
				801126	883998	82872		J417_03940	864502	864927	-1	SnoaL-like domain-containing protein
				801126	883998	82872		J417_03945	865938	867107	1	hypothetical protein
				801126	883998	82872		J417_03950	867104	867565	1	hypothetical protein
				801126	883998	82872		J417_03955	867562	869556	1	DUF3732 domain-containing protein
				801126	883998	82872		J417_03960	869664	870064	-1	single-stranded DNA-binding protein
				801126	883998	82872		J417_03965	870172	870684	-1	DUF3158 family protein
				801126	883998	82872		J417_03970	870681	871499	-1	TIGR03761 family integrating conjugative element protein
				801126	883998	82872		J417_03975	871683	872897	-1	hypothetical protein
				801126	883998	82872		J417_03980	872897	873457	-1	DUF2857 domain-containing protein
				801126	883998	82872		J417_03985	873469	875193	-1	ParB N-terminal domain-containing protein
				801126	883998	82872		J417_03990	875201	875446	-1	type II toxin-antitoxin system HicA family toxin
				801126	883998	82872		J417_03995	875430	876134	-1	ParA family protein
				801126	883998	82872		J417_04000	876168	876380	-1	AlpA family phage regulatory protein
				801126	883998	82872		J417_04005	877088	877855	-1	hypothetical protein
				801126	883998	82872		J417_04010	878044	878919	-1	transposase
				801126	883998	82872		J417_04015	879227	880375	1	IS3 family transposase
				801126	883998	82872		J417_04020	880415	881644	-1	integrase arm-type DNA-binding domain-containing protein
				801126	883998	82872	smpB	J417_04030	882224	882706	-1	SsrA-binding protein SmpB
				801126	883998	82872		J417_04035	882862	883296	1	type II toxin-antitoxin system RatA family toxin
				801126	883998	82872		J417_04040	883289	883582	1	RnfH family protein
				801126	883998	82872	bamE	J417_04045	883654	883998	-1	outer membrane protein assembly factor BamE
GI5				987302	996772	9470		J417_04495	987302	987469	-1	hypothetical protein
				987302	996772	9470		J417_04500	987474	987913	1	IS5/IS1182 family transposase
				987302	996772	9470		J417_04505	988088	989296	-1	MFS transporter
				987302	996772	9470		J417_04510	989317	990561	-1	biotin carboxylase
				987302	996772	9470		J417_04515	990561	991721	-1	ATP-grasp domain-containing protein
				987302	996772	9470		J417_04520	991718	992965	-1	ATP-grasp domain-containing protein
				987302	996772	9470		J417_04525	993046	993780	-1	hypothetical protein
				987302	996772	9470		J417_04530	993785	994063	-1	(2Fe-2S)-binding protein
				987302	996772	9470		J417_04535	994035	995117	-1	hypothetical protein
				987302	996772	9470		J417_04540	995363	996772	1	PLP-dependent aminotransferase family protein
GI6				1006443	1023120	16677		J417_04580	1006443	1006970	-1	AAA family ATPase
				1006443	1023120	16677		J417_04585	1007201	1008307	-1	ABC transporter substrate-binding protein
				1006443	1023120	16677		J417_04590	1008796	1013370	-1	ATP-binding protein
				1006443	1023120	16677		J417_04595	1013552	1014139	-1	hypothetical protein
				1006443	1023120	16677		J417_04600	1014196	1014456	-1	helix-turn-helix transcriptional regulator
				1006443	1023120	16677		J417_04605	1014561	1014821	-1	helix-turn-helix transcriptional regulator
				1006443	1023120	16677		J417_04610	1014945	1015238	1	transcriptional regulator
				1006443	1023120	16677		J417_04615	1015514	1015807	1	DUF1778 domain-containing protein
				1006443	1023120	16677		J417_04620	1015804	1016298	1	GNAT family N-acetyltransferase
				1006443	1023120	16677		J417_04625	1016912	1017949	1	nucleotidyltransferase
				1006443	1023120	16677		J417_04630	1017946	1019682	1	ThiF family adenylyltransferase
				1006443	1023120	16677		J417_04635	1019675	1020145	1	hypothetical protein
				1006443	1023120	16677		J417_04640	1020155	1021222	1	SAVED domain-containing protein
				1006443	1023120	16677		J417_04645	1021809	1022360	-1	restriction endonuclease
				1006443	1023120	16677	ccdB	J417_04650	1022594	1022899	-1	type II toxin-antitoxin system toxin CcdB
				1006443	1023120	16677	ccdA	J417_04655	1022902	1023120	-1	type II toxin-antitoxin system antitoxin CcdA
GI7	gypsy:1118966-1119406			1115356	1119684	4328		J417_05095	1115356	1116876	1	hypothetical protein
				1115356	1119684	4328		J417_05100	1117131	1117436	-1	transposase
				1115356	1119684	4328		J417_05105	1117519	1118764	1	IS110 family transposase
				1115356	1119684	4328		J417_05110	1118990	1119684	-1	IS3 family transposase
GI8				1495662	1508193	12531		J417_06785	1495662	1496093	-1	hypothetical protein
				1495662	1508193	12531		J417_06790	1496377	1498395	1	RHS repeat protein
				1495662	1508193	12531		J417_06795	1498400	1498750	1	hypothetical protein
				1495662	1508193	12531		J417_06800	1498815	1499165	-1	type I addiction module toxin, SymE family
				1495662	1508193	12531		J417_06805	1499162	1499491	-1	type I toxin-antitoxin system SymE family toxin
				1495662	1508193	12531		J417_06810	1499571	1499904	-1	helix-turn-helix transcriptional regulator
				1495662	1508193	12531		J417_06815	1500333	1501649	1	hypothetical protein
				1495662	1508193	12531		J417_06820	1501982	1502245	1	hypothetical protein
				1495662	1508193	12531		J417_06825	1502307	1502498	-1	type I addiction module toxin, SymE family
				1495662	1508193	12531		J417_06830	1502466	1502855	1	hypothetical protein
				1495662	1508193	12531		J417_06835	1502916	1503135	-1	type I addiction module toxin, SymE family
				1495662	1508193	12531		J417_06840	1503191	1504915	1	type IV secretion protein Rhs
				1495662	1508193	12531		J417_06845	1504900	1505352	1	hypothetical protein
				1495662	1508193	12531		J417_06850	1505599	1506749	-1	IS3 family transposase
				1495662	1508193	12531		J417_06855	1506917	1507501	1	hypothetical protein
				1495662	1508193	12531		J417_06860	1507619	1508008	1	DUF2750 domain-containing protein
				1495662	1508193	12531		J417_06865	1508080	1508193	-1	type I addiction module toxin, SymE family
GI9				1676369	1683114	6745		J417_07470	1676058	1676372	1	CcdB family protein
				1676369	1683114	6745		J417_07475	1676369	1676494	-1	molybdopterin-guanine dinucleotide biosynthesis protein MobC
				1676369	1683114	6745		J417_07480	1676665	1676883	1	hypothetical protein
				1676369	1683114	6745		J417_07485	1677009	1679027	-1	ATP-binding protein
				1676369	1683114	6745		J417_07490	1679024	1680403	-1	DUF4263 domain-containing protein
				1676369	1683114	6745		J417_07495	1680413	1681633	-1	restriction endonuclease subunit S
				1676369	1683114	6745		J417_07500	1681636	1683114	-1	SAM-dependent DNA methyltransferase
GI10				1689464	1694700	5236		J417_07530	1689464	1689778	1	CcdB family protein
				1689464	1694700	5236		J417_07535	1689775	1690026	-1	mobilization protein mobC
				1689464	1694700	5236		J417_07540	1690088	1691400	1	SIR2 family protein
				1689464	1694700	5236		J417_07545	1691652	1691913	1	DNA primase
				1689464	1694700	5236		J417_07550	1692349	1693125	1	serine/threonine-protein kinase
				1689464	1694700	5236		J417_07555	1693122	1693859	1	serine/threonine-protein phosphatase
				1689464	1694700	5236		J417_07560	1693910	1694059	1	transposase
				1689464	1694700	5236		J417_07565	1694371	1694700	1	hypothetical protein
GI11		1715962-1716011	P3：J417_07650-J417_07730	1707382	1716933	9551		J417_07630	1707382	1707657	-1	TrbC/VirB2 family protein
				1707382	1716933	9551		J417_07635	1707677	1708324	-1	lytic transglycosylase domain-containing protein
				1707382	1716933	9551		J417_07640	1708395	1708632	-1	hypothetical protein
				1707382	1716933	9551		J417_07645	1709542	1711056	1	hypothetical protein
				1707382	1716933	9551		J417_07650	1711329	1713338	-1	AAA family ATPase
				1707382	1716933	9551		J417_07655	1713793	1714002	-1	TraR/DksA family transcriptional regulator
				1707382	1716933	9551		J417_07660	1713992	1714576	-1	DUF2857 domain-containing protein
				1707382	1716933	9551		J417_07665	1714593	1714787	-1	AlpA family transcriptional regulator
				1707382	1716933	9551		J417_07670	1715284	1715541	-1	helix-turn-helix transcriptional regulator
				1707382	1716933	9551		J417_07675	1715655	1715933	-1	helix-turn-helix transcriptional regulator
				1707382	1716933	9551		J417_07680	1716067	1716336	1	transcriptional regulator
				1707382	1716933	9551		J417_07685	1716688	1716933	-1	helix-turn-helix transcriptional regulator
GI12		1787512-1787547		1770592	1789197	18605	ygjG	J417_07910	1770592	1772010	1	putrescine aminotransferase
				1770592	1789197	18605		J417_07915	1772116	1772418	-1	hypothetical protein
				1770592	1789197	18605		J417_07920	1772690	1773229	1	DUF3916 domain-containing protein
				1770592	1789197	18605		J417_07925	1773539	1773973	-1	restriction endonuclease
				1770592	1789197	18605		J417_07930	1773982	1777671	-1	RNA-directed DNA polymerase
				1770592	1789197	18605		J417_07935	1778333	1778584	1	hypothetical protein
				1770592	1789197	18605		J417_07940	1778556	1778903	1	phosphotyrosine protein phosphatase
				1770592	1789197	18605	phnF	J417_07945	1779293	1780012	1	phosphonate metabolism transcriptional regulator PhnF
				1770592	1789197	18605	phnG	J417_07950	1780013	1780462	1	phosphonate C-P lyase system protein PhnG
				1770592	1789197	18605	phnH	J417_07955	1780459	1781034	1	phosphonate C-P lyase system protein PhnH
				1770592	1789197	18605		J417_07960	1781034	1782125	1	carbon-phosphorus lyase complex subunit PhnI
				1770592	1789197	18605		J417_07965	1782103	1782957	1	alpha-D-ribose 1-methylphosphonate 5-phosphate C-P-lyase PhnJ
				1770592	1789197	18605	phnK	J417_07970	1782989	1783759	1	phosphonate C-P lyase system protein PhnK
				1770592	1789197	18605	phnL	J417_07975	1783784	1784506	1	phosphonate C-P lyase system protein PhnL
				1770592	1789197	18605	phnM	J417_07980	1784503	1785672	1	alpha-D-ribose 1-methylphosphonate 5-triphosphate diphosphatase
				1770592	1789197	18605	phnN	J417_07985	1785672	1786235	1	ribose 1,5-bisphosphokinase
				1770592	1789197	18605	phnP	J417_07990	1786254	1787003	1	phosphonate metabolism protein PhnP
				1770592	1789197	18605	phnC	J417_07995	1787245	1788123	1	phosphonate ABC transporter ATP-binding protein
				1770592	1789197	18605	phnD	J417_08000	1788265	1789197	1	phosphonate ABC transporter substrate-binding protein
GI13				1817097	1821519	4422	citC	J417_08120	1817097	1818146	1	[citrate (pro-3S)-lyase] ligase
				1817097	1821519	4422	citD	J417_08125	1818181	1818471	1	citrate lyase acyl carrier protein
				1817097	1821519	4422	citE	J417_08130	1818471	1819361	1	citrate (pro-3S)-lyase subunit beta
				1817097	1821519	4422	citF	J417_08135	1819451	1820980	1	citrate lyase subunit alpha
				1817097	1821519	4422	citX	J417_08140	1820977	1821519	1	citrate lyase holo-[acyl-carrier protein] synthase
GI14				1891932	1897502	5570		J417_08455	1892229	1893215	-1	NAD(P)H-binding protein
				1891932	1897502	5570		J417_08460	1893312	1894223	1	LysR family transcriptional regulator
				1891932	1897502	5570		J417_08465	1894267	1895559	-1	FAD-binding oxidoreductase
				1891932	1897502	5570		J417_08470	1895581	1896003	-1	RidA family protein
				1891932	1897502	5570		J417_08475	1896019	1897158	-1	ornithine cyclodeaminase
				1891932	1897502	5570		J417_08480	1897337	1898170	1	AraC family transcriptional regulator
GI15	gypsy:1900128-1900811			1900704	1905324	4620		J417_08495	1900098	1901080	-1	IS3 family transposase
				1900704	1905324	4620		J417_08500	1901147	1902169	1	IS110 family transposase
				1900704	1905324	4620		J417_08505	1902392	1902508	-1	transposase
				1900704	1905324	4620		J417_08510	1902921	1903828	1	LysR family transcriptional regulator
				1900704	1905324	4620		J417_08515	1904367	1904858	-1	DUF2569 domain-containing protein
GI16	gypsy:2019778-2020194			2017067	2022423	5356		J417_09025	2017067	2017525	1	GNAT family N-acetyltransferase
				2017067	2022423	5356		J417_09030	2017978	2018319	1	hypothetical protein
				2017067	2022423	5356		J417_09035	2018426	2019079	1	CPBP family intramembrane metalloprotease
				2017067	2022423	5356		J417_09040	2019239	2020359	1	IS3 family transposase
				2017067	2022423	5356		J417_09045	2020505	2020732	-1	hypothetical protein
				2017067	2022423	5356		J417_09050	2020729	2021208	-1	DUF2778 domain-containing protein
				2017067	2022423	5356		J417_09055	2021255	2021824	-1	hypothetical protein
				2017067	2022423	5356		J417_09060	2022181	2022423	-1	ABC transporter ATP-binding protein
GI17	gypsy:2371080-2371595			2324286	2328611	4325		J417_10440	2324286	2324882	-1	YolA family protein
				2324286	2328611	4325		J417_10445	2325278	2325547	-1	YciN family protein
				2324286	2328611	4325	topA	J417_10450	2325989	2328611	1	type I DNA topoisomerase
GI18				2367719	2387086	19367		J417_10625	2367719	2368096	-1	hypothetical protein
				2367719	2387086	19367		J417_10630	2368128	2368619	-1	hypothetical protein
				2367719	2387086	19367		J417_10635	2369213	2369662	-1	hypothetical protein
				2367719	2387086	19367		J417_10640	2370170	2370519	-1	transposase
				2367719	2387086	19367		J417_10645	2370541	2371661	1	IS3 family transposase
				2367719	2387086	19367		J417_10650	2371875	2374325	-1	RNA polymerase subunit sigma-70
				2367719	2387086	19367		J417_10655	2374327	2376555	-1	DEAD/DEAH box helicase family protein
				2367719	2387086	19367		J417_10660	2376665	2376940	-1	transposase
				2367719	2387086	19367		J417_10665	2376971	2377291	1	MBL fold metallo-hydrolase
				2367719	2387086	19367		J417_10670	2377252	2378016	1	hypothetical protein
				2367719	2387086	19367		J417_10675	2378023	2378583	-1	RNA polymerase sigma factor
				2367719	2387086	19367		J417_10680	2378589	2379014	-1	hypothetical protein
				2367719	2387086	19367		J417_10685	2379156	2379500	-1	MmcQ protein
				2367719	2387086	19367		J417_10690	2379604	2380605	-1	acyltransferase family protein
				2367719	2387086	19367	tehA	J417_10695	2381335	2382303	1	dicarboxylate transporter/tellurite-resistance protein TehA
				2367719	2387086	19367		J417_10700	2382598	2383293	1	Expansin-YoaJ
				2367719	2387086	19367		J417_10705	2383537	2385405	1	potassium transporter Kup
				2367719	2387086	19367		J417_10710	2385650	2387086	-1	serralysin family metalloprotease
				2367719	2377291	9572		J417_10625	2367719	2368096	-1	hypothetical protein
				2367719	2377291	9572		J417_10630	2368128	2368619	-1	hypothetical protein
				2367719	2377291	9572		J417_10635	2369213	2369662	-1	hypothetical protein
				2367719	2377291	9572		J417_10640	2370170	2370519	-1	transposase
				2367719	2377291	9572		J417_10645	2370541	2371661	1	IS3 family transposase
				2367719	2377291	9572		J417_10650	2371875	2374325	-1	RNA polymerase subunit sigma-70
				2367719	2377291	9572		J417_10655	2374327	2376555	-1	DEAD/DEAH box helicase family protein
				2367719	2377291	9572		J417_10660	2376665	2376940	-1	transposase
				2367719	2377291	9572		J417_10665	2376971	2377291	1	MBL fold metallo-hydrolase
				2367719	2377291	9572		J417_10670	2377252	2378016	1	hypothetical protein
GI19				2374066	2379622	5556		J417_10650	2371875	2374325	-1	RNA polymerase subunit sigma-70
				2374066	2379622	5556		J417_10655	2374327	2376555	-1	DEAD/DEAH box helicase family protein
				2374066	2379622	5556		J417_10660	2376665	2376940	-1	transposase
				2374066	2379622	5556		J417_10665	2376971	2377291	1	MBL fold metallo-hydrolase
				2374066	2379622	5556		J417_10670	2377252	2378016	1	hypothetical protein
				2374066	2379622	5556		J417_10675	2378023	2378583	-1	RNA polymerase sigma factor
				2374066	2379622	5556		J417_10680	2378589	2379014	-1	hypothetical protein
				2374066	2379622	5556		J417_10685	2379156	2379500	-1	MmcQ protein
				2374066	2379622	5556		J417_10690	2379604	2380605	-1	acyltransferase family protein
GI20				2379156	2383293	4137		J417_10685	2379156	2379500	-1	MmcQ protein
				2379156	2383293	4137		J417_10690	2379604	2380605	-1	acyltransferase family protein
				2379156	2383293	4137	tehA	J417_10695	2381335	2382303	1	dicarboxylate transporter/tellurite-resistance protein TehA
				2379156	2383293	4137		J417_10700	2382598	2383293	1	Expansin-YoaJ
GI21	gypsy:2482412-2483041	2465368-2465447；2483159-2483278		2444075	2485890	41815	pth	J417_10945	2444075	2444662	1	aminoacyl-tRNA hydrolase
				2444075	2485890	41815	ychF	J417_10950	2444792	2445883	1	redox-regulated ATPase YchF
				2444075	2485890	41815		J417_10955	2446098	2447291	1	tyrosine-type recombinase/integrase
				2444075	2485890	41815		J417_10960	2447721	2448722	1	phage exclusion protein
				2444075	2485890	41815		J417_10965	2449246	2450106	-1	hypothetical protein
				2444075	2485890	41815		J417_10970	2450704	2451198	1	DUF523 domain-containing protein
				2444075	2485890	41815		J417_10975	2451588	2452247	1	hypothetical protein
				2444075	2485890	41815		J417_10980	2452515	2452811	-1	barnase inhibitor
				2444075	2485890	41815		J417_10985	2453064	2454859	-1	hypothetical protein
				2444075	2485890	41815		J417_10990	2454990	2456489	-1	hypothetical protein
				2444075	2485890	41815		J417_10995	2456850	2457950	-1	hypothetical protein
				2444075	2485890	41815		J417_11000	2458107	2458301	-1	AlpA family phage regulatory protein
				2444075	2485890	41815		J417_11005	2458580	2459083	1	hypothetical protein
				2444075	2485890	41815		J417_11010	2459125	2460045	-1	site-specific integrase
				2444075	2485890	41815	radC	J417_11015	2460088	2460531	-1	DNA repair protein RadC
				2444075	2485890	41815		J417_11020	2460518	2461069	-1	hypothetical protein
				2444075	2485890	41815		J417_11025	2461159	2461569	-1	DUF2787 domain-containing protein
				2444075	2485890	41815		J417_11030	2461963	2462376	-1	hypothetical protein
				2444075	2485890	41815		J417_11035	2462486	2462758	1	transcriptional regulator
				2444075	2485890	41815		J417_11040	2462755	2463276	1	hypothetical protein
				2444075	2485890	41815		J417_11045	2463290	2463658	1	hypothetical protein
				2444075	2485890	41815		J417_11050	2463878	2464195	1	hypothetical protein
				2444075	2485890	41815		J417_11055	2464377	2464964	1	hypothetical protein
				2444075	2485890	41815		J417_11060	2465352	2465711	-1	hypothetical protein
				2444075	2485890	41815		J417_11065	2465970	2466356	-1	hypothetical protein
				2444075	2485890	41815		J417_11070	2467196	2468344	-1	Dna2/Cas4 domain-containing protein
				2444075	2485890	41815		J417_11075	2468352	2474300	-1	DEAD/DEAH box helicase
				2444075	2485890	41815		J417_11080	2474315	2477095	-1	kinetochore protein
				2444075	2485890	41815		J417_11085	2477131	2479896	-1	hypothetical protein
				2444075	2485890	41815		J417_11090	2479906	2480991	-1	DNA cytosine methyltransferase
				2444075	2485890	41815		J417_11095	2481980	2483101	1	IS3 family transposase
				2444075	2485890	41815		J417_11100	2483862	2484188	-1	AzlD domain-containing protein
				2444075	2485890	41815		J417_11105	2484190	2484930	-1	branched-chain amino acid ABC transporter permease
				2444075	2485890	41815		J417_11110	2485054	2485890	1	AraC family transcriptional regulator
GI22				2721815	2727711	5896		J417_12130	2721815	2723161	-1	aromatic acid/H+ symport family MFS transporter
				2721815	2727711	5896		J417_12135	2723383	2723610	-1	hypothetical protein
				2721815	2727711	5896		J417_12140	2723607	2724356	-1	hypothetical protein
				2721815	2727711	5896		J417_12145	2724381	2724962	1	recombinase family protein
				2721815	2727711	5896		J417_12150	2725124	2725702	1	phage tail protein
				2721815	2727711	5896		J417_12155	2725705	2726316	1	tail fiber assembly protein
				2721815	2727711	5896		J417_12160	2726542	2727711	1	phage tail sheath protein
GI23	gypsy:3042822-3043238	2979045-2979520	P5：J417_13580-J417_13895	2977268	3063490	86222	fabA	J417_13215	2977268	2977786	1	bifunctional 3-hydroxydecanoyl-ACP dehydratase/trans-2-decenoyl-ACP isomerase
				2977268	3063490	86222		J417_13220	2978116	2978754	1	RpiB/LacA/LacB family sugar-phosphate isomerase
				2977268	3063490	86222		J417_13230	2979920	2981524	1	HAMP domain-containing protein
				2977268	3063490	86222	phoH	J417_13235	2981592	2982380	-1	phosphate starvation-inducible protein PhoH
				2977268	3063490	86222	fliZ	J417_13240	2983028	2983540	-1	flagella biosynthesis regulatory protein FliZ
				2977268	3063490	86222		J417_13245	2983593	2984315	-1	RNA polymerase sigma factor FliA
				2977268	3063490	86222		J417_13250	2984697	2986106	-1	hypothetical protein
				2977268	3063490	86222		J417_13255	2986229	2987425	-1	hypothetical protein
				2977268	3063490	86222		J417_13260	2987409	2988494	-1	acyl-protein synthetase
				2977268	3063490	86222		J417_13265	2988484	2989890	-1	AMP-binding protein
				2977268	3063490	86222		J417_13270	2989893	2990861	-1	transketolase
				2977268	3063490	86222		J417_13275	2990855	2991679	-1	transketolase
				2977268	3063490	86222		J417_13280	2991676	2992422	-1	SDR family oxidoreductase
				2977268	3063490	86222		J417_13285	2992438	2993181	-1	SDR family oxidoreductase
				2977268	3063490	86222		J417_13290	2993191	2993427	-1	acyl carrier protein
				2977268	3063490	86222		J417_13295	2993517	2994173	-1	NeuD/PglB/VioB family sugar acetyltransferase
				2977268	3063490	86222		J417_13300	2994185	2995306	-1	DegT/DnrJ/EryC1/StrS family aminotransferase
				2977268	3063490	86222		J417_13305	2995421	2998852	-1	methyltransferase
				2977268	3063490	86222		J417_13310	2999081	2999923	-1	flagellin FliC
				2977268	3063490	86222	fliD	J417_13315	3000467	3001921	1	flagellar filament capping protein FliD
				2977268	3063490	86222	fliS	J417_13320	3002020	3002430	1	flagellar export chaperone FliS
				2977268	3063490	86222	fliT	J417_13325	3002430	3002792	1	flagella biosynthesis regulatory protein FliT
				2977268	3063490	86222	fliE	J417_13330	3002974	3003288	-1	flagellar hook-basal body complex protein FliE
				2977268	3063490	86222	fliF	J417_13335	3003621	3005345	1	flagellar M-ring protein FliF
				2977268	3063490	86222	fliG	J417_13340	3005342	3006334	1	flagellar motor switch protein FliG
				2977268	3063490	86222	fliH	J417_13345	3006327	3007070	1	flagellar assembly protein FliH
				2977268	3063490	86222	fliI	J417_13350	3007070	3008440	1	flagellum-specific ATP synthase FliI
				2977268	3063490	86222	fliJ	J417_13355	3008449	3008889	1	flagella biosynthesis chaperone FliJ
				2977268	3063490	86222		J417_13360	3008892	3010229	1	flagellar hook-length control protein FliK
				2977268	3063490	86222	fliL	J417_13365	3010363	3010851	1	flagellar basal body-associated protein FliL
				2977268	3063490	86222	fliM	J417_13370	3010857	3011873	1	flagellar motor switch protein FliM
				2977268	3063490	86222	fliN	J417_13375	3011866	3012282	1	flagellar motor switch protein FliN
				2977268	3063490	86222	fliO	J417_13380	3012282	3012698	1	flagellar biosynthetic protein FliO
				2977268	3063490	86222	fliP	J417_13385	3012695	3013471	1	flagellar type III secretion system pore protein FliP
				2977268	3063490	86222	fliQ	J417_13390	3013515	3013784	1	flagellar biosynthesis protein FliQ
				2977268	3063490	86222	fliR	J417_13395	3013787	3014569	1	flagellar type III secretion system protein FliR
				2977268	3063490	86222	flgL	J417_13400	3014708	3015637	-1	flagellar hook-associated protein FlgL
				2977268	3063490	86222	flgK	J417_13405	3015676	3017592	-1	flagellar hook-associated protein FlgK
				2977268	3063490	86222	flgJ	J417_13410	3017719	3018672	-1	flagellar assembly peptidoglycan hydrolase FlgJ
				2977268	3063490	86222		J417_13415	3018672	3019781	-1	flagellar basal body P-ring protein FlgI
				2977268	3063490	86222	flgH	J417_13420	3019798	3020514	-1	flagellar basal body L-ring protein FlgH
				2977268	3063490	86222	flgG	J417_13425	3020652	3021434	-1	flagellar basal-body rod protein FlgG
				2977268	3063490	86222		J417_13430	3021461	3022216	-1	flagellar basal body rod protein FlgF
				2977268	3063490	86222	flgE	J417_13435	3022238	3023437	-1	flagellar hook protein FlgE
				2977268	3063490	86222	flgD	J417_13440	3023504	3024175	-1	flagellar hook assembly protein FlgD
				2977268	3063490	86222	flgC	J417_13445	3024188	3024592	-1	flagellar basal body rod protein FlgC
				2977268	3063490	86222	flgB	J417_13450	3024626	3025045	-1	flagellar basal body rod protein FlgB
				2977268	3063490	86222	flgA	J417_13455	3025212	3025880	1	flagellar basal body P-ring formation protein FlgA
				2977268	3063490	86222	flgM	J417_13460	3026026	3026325	1	anti-sigma-28 factor FlgM
				2977268	3063490	86222		J417_13465	3026330	3026767	1	flagellar biosynthesis protein FlgN
				2977268	3063490	86222		J417_13470	3026845	3027267	-1	flagellar protein FlhE
				2977268	3063490	86222	flhA	J417_13475	3027267	3029360	-1	flagellar biosynthesis protein FlhA
				2977268	3063490	86222	flhB	J417_13480	3029353	3030504	-1	flagellar type III secretion system protein FlhB
				2977268	3063490	86222	cheZ	J417_13485	3030735	3031379	-1	protein phosphatase CheZ
				2977268	3063490	86222	cheY	J417_13490	3031389	3031778	-1	chemotaxis protein CheY
				2977268	3063490	86222		J417_13495	3031814	3032866	-1	chemotaxis response regulator protein-glutamate methylesterase
				2977268	3063490	86222	cheR	J417_13500	3032866	3033738	-1	protein-glutamate O-methyltransferase CheR
				2977268	3063490	86222		J417_13505	3034452	3036158	-1	HAMP domain-containing protein
				2977268	3063490	86222	cheW	J417_13510	3036278	3036775	-1	chemotaxis protein CheW
				2977268	3063490	86222	cheA	J417_13515	3036811	3038853	-1	chemotaxis protein CheA
				2977268	3063490	86222	motB	J417_13520	3038865	3039995	-1	flagellar motor protein MotB
				2977268	3063490	86222	motA	J417_13525	3039992	3040879	-1	flagellar motor stator protein MotA
				2977268	3063490	86222	flhC	J417_13530	3041013	3041591	-1	flagellar transcriptional regulator FlhC
				2977268	3063490	86222	flhD	J417_13535	3041594	3041944	-1	flagellar transcriptional regulator FlhD
				2977268	3063490	86222		J417_13540	3042657	3043777	-1	IS3 family transposase
				2977268	3063490	86222		J417_13545	3044593	3046317	1	HAMP domain-containing protein
				2977268	3063490	86222	dsrB	J417_13550	3046355	3046555	-1	protein DsrB
				2977268	3063490	86222		J417_13555	3046606	3047016	-1	VOC family protein
				2977268	3063490	86222		J417_13560	3047464	3048900	1	EmmdR/YeeO family multidrug/toxin efflux MATE transporter
				2977268	3063490	86222		J417_13565	3049123	3049500	1	cytochrome b562
				2977268	3063490	86222		J417_13570	3049993	3051279	1	cellulase family glycosylhydrolase
				2977268	3063490	86222		J417_13575	3051353	3052630	-1	pectate lyase
				2977268	3063490	86222		J417_13580	3053251	3053562	1	holin
				2977268	3063490	86222		J417_13585	3053552	3054043	1	glycoside hydrolase family 104 protein
				2977268	3063490	86222		J417_13590	3054040	3054480	1	LysB family phage lysis regulatory protein
				2977268	3063490	86222		J417_13595	3054980	3055987	-1	tyrosine-type recombinase/integrase
				2977268	3063490	86222		J417_13600	3056009	3056842	-1	DUF4393 domain-containing protein
				2977268	3063490	86222		J417_13605	3056938	3057549	-1	hypothetical protein
				2977268	3063490	86222		J417_13610	3057608	3057943	-1	hypothetical protein
				2977268	3063490	86222		J417_13615	3057942	3058190	1	hypothetical protein
				2977268	3063490	86222		J417_13620	3058206	3058547	-1	DUF2511 domain-containing protein
				2977268	3063490	86222		J417_13625	3058573	3058962	-1	helix-turn-helix transcriptional regulator
				2977268	3063490	86222		J417_13630	3059047	3059316	1	hypothetical protein
				2977268	3063490	86222		J417_13635	3059337	3059801	-1	hypothetical protein
				2977268	3063490	86222		J417_13640	3060056	3060247	1	hypothetical protein
				2977268	3063490	86222		J417_13645	3060253	3060465	1	DNA-binding protein
				2977268	3063490	86222		J417_13650	3060692	3060901	1	DUF2724 domain-containing protein
				2977268	3063490	86222		J417_13655	3060906	3061247	1	DUF5347 domain-containing protein
				2977268	3063490	86222		J417_13660	3061312	3061542	1	DUF2732 domain-containing protein
				2977268	3063490	86222		J417_13665	3061542	3061760	1	TraR/DksA family transcriptional regulator
				2977268	3063490	86222		J417_13670	3061763	3062356	1	3'-5' exoribonuclease
				2977268	3063490	86222		J417_13675	3062353	3063195	1	Dam family site-specific DNA-(adenine-N6)-methyltransferase
				2977268	3063490	86222		J417_13680	3063188	3063490	1	ASCH domain-containing protein
GI24				3072758	3077473	4715		J417_13730	3072758	3073639	1	terminase
				3072758	3077473	4715		J417_13735	3073738	3074229	1	head completion/stabilization protein
				3072758	3077473	4715		J417_13740	3074229	3074429	1	phage tail protein
				3072758	3077473	4715		J417_13745	3074420	3074722	1	phage tail protein
				3072758	3077473	4715		J417_13750	3074706	3075251	1	lysozyme
				3072758	3077473	4715		J417_13755	3075248	3075685	1	DUF2570 domain-containing protein
				3072758	3077473	4715		J417_13760	3075802	3076260	1	phage tail protein
				3072758	3077473	4715		J417_13765	3076257	3076895	1	phage virion morphogenesis protein
				3072758	3077473	4715		J417_13770	3076892	3077473	1	phage baseplate assembly protein V
				3072758	3077473	4715		J417_13775	3077470	3077838	1	baseplate assembly protein
GI25				3081017	3087863	6846		J417_13795	3080436	3081044	1	tail fiber assembly protein
				3081017	3087863	6846		J417_13800	3081073	3081582	-1	phage tail protein
				3081017	3087863	6846		J417_13805	3081595	3084567	-1	phage tail tape measure protein
				3081017	3087863	6846		J417_13810	3084554	3084712	-1	GpE family phage tail protein
				3081017	3087863	6846		J417_13815	3084718	3085035	-1	phage tail assembly protein
				3081017	3087863	6846		J417_13820	3085083	3085598	-1	phage major tail tube protein
				3081017	3087863	6846		J417_13825	3085599	3086777	-1	phage tail sheath family protein
				3081017	3087863	6846		J417_13830	3086930	3088069	1	phage late control D family protein
GI26		3163382-3163439		3092727	3138318	45591		J417_13870	3092727	3092951	1	DUF2594 family protein
				3092727	3138318	45591	cycA	J417_13880	3093649	3095052	1	D-serine/D-alanine/glycine transporter
				3092727	3138318	45591		J417_13885	3095137	3095400	-1	LysR family transcriptional regulator
				3092727	3138318	45591		J417_13895	3096038	3097324	1	integrase arm-type DNA-binding domain-containing protein
				3092727	3138318	45591		J417_13900	3097519	3098901	-1	DHA2 family efflux MFS transporter permease subunit
				3092727	3138318	45591		J417_13905	3099181	3099837	1	NAD(P)H-binding protein
				3092727	3138318	45591		J417_13910	3100306	3100920	1	hypothetical protein
				3092727	3138318	45591		J417_13915	3100915	3101169	-1	hypothetical protein
				3092727	3138318	45591		J417_13920	3101630	3101806	1	hypothetical protein
				3092727	3138318	45591		J417_13925	3102614	3103375	-1	shufflon system plasmid conjugative transfer pilus tip adhesin PilV
				3092727	3138318	45591		J417_13930	3103558	3103959	1	H-NS histone family protein
				3092727	3138318	45591		J417_13935	3104041	3104589	1	hypothetical protein
				3092727	3138318	45591		J417_13940	3104584	3104949	-1	hypothetical protein
				3092727	3138318	45591		J417_13945	3105069	3105353	-1	conjugal transfer protein TraD
				3092727	3138318	45591		J417_13950	3105350	3105607	-1	hypothetical protein
				3092727	3138318	45591		J417_13955	3105935	3106696	1	hypothetical protein
				3092727	3138318	45591		J417_13960	3106840	3107712	-1	hypothetical protein
				3092727	3138318	45591		J417_13965	3108634	3110067	1	MobA/MobL family protein
				3092727	3138318	45591		J417_13970	3110223	3110852	-1	hypothetical protein
				3092727	3138318	45591		J417_13975	3111040	3111603	1	hypothetical protein
				3092727	3138318	45591		J417_13980	3111693	3112337	-1	hypothetical protein
				3092727	3138318	45591		J417_13985	3112355	3112909	-1	lipoprotein
				3092727	3138318	45591		J417_13990	3113290	3113682	1	hypothetical protein
				3092727	3138318	45591		J417_13995	3113813	3114289	1	hypothetical protein
				3092727	3138318	45591		J417_14000	3114432	3114860	1	hypothetical protein
				3092727	3138318	45591		J417_14005	3115090	3115356	1	hypothetical protein
				3092727	3138318	45591		J417_14010	3115581	3116831	-1	hypothetical protein
				3092727	3138318	45591		J417_14015	3117047	3117268	1	hypothetical protein
				3092727	3138318	45591		J417_14020	3117297	3117677	-1	hypothetical protein
				3092727	3138318	45591		J417_14025	3117864	3118685	1	hypothetical protein
				3092727	3138318	45591		J417_14030	3118716	3121379	-1	DotA/TraY family protein
				3092727	3138318	45591		J417_14035	3121436	3121930	-1	hypothetical protein
				3092727	3138318	45591		J417_14040	3122566	3123435	1	replication protein
				3092727	3138318	45591		J417_14045	3123432	3123686	1	plasmid replication protein
				3092727	3138318	45591		J417_14050	3123989	3124186	1	hypothetical protein
				3092727	3138318	45591		J417_14055	3124225	3124983	-1	caspase family protein
				3092727	3138318	45591		J417_14060	3124980	3125474	-1	hypothetical protein
				3092727	3138318	45591		J417_14065	3125629	3126021	-1	hypothetical protein
				3092727	3138318	45591		J417_14070	3125987	3126187	-1	hypothetical protein
				3092727	3138318	45591		J417_14075	3126259	3126579	-1	hypothetical protein
				3092727	3138318	45591		J417_14080	3126763	3127356	-1	hypothetical protein
				3092727	3138318	45591		J417_14085	3128621	3129355	1	DNA-binding protein
				3092727	3138318	45591		J417_14090	3129383	3130183	1	hypothetical protein
				3092727	3138318	45591		J417_14095	3130342	3130896	1	DUF4756 family protein
				3092727	3138318	45591		J417_14100	3131391	3131900	-1	GrpB family protein
				3092727	3138318	45591		J417_14105	3131947	3132648	-1	winged helix-turn-helix transcriptional regulator
				3092727	3138318	45591		J417_14110	3132650	3133042	-1	amino acid-binding protein
				3092727	3138318	45591		J417_14115	3133035	3133358	-1	antibiotic biosynthesis monooxygenase
				3092727	3138318	45591		J417_14120	3133476	3133718	-1	DNA-binding protein
				3092727	3138318	45591		J417_14125	3133781	3134146	-1	hypothetical protein
				3092727	3138318	45591		J417_14130	3134203	3134493	-1	hypothetical protein
				3092727	3138318	45591		J417_14135	3134568	3134891	-1	hypothetical protein
				3092727	3138318	45591		J417_14140	3134921	3135139	-1	AlpA family transcriptional regulator
				3092727	3138318	45591		J417_14145	3135326	3136186	-1	hypothetical protein
				3092727	3138318	45591		J417_14150	3137056	3138318	1	glycosyltransferase family 1 protein
GI27		3317899-3317929		3281136	3324593	43457	fadL	J417_14730	3281136	3282401	1	long-chain fatty acid transporter FadL
				3281136	3324593	43457	mqo	J417_14735	3282476	3284047	-1	malate dehydrogenase (quinone)
				3281136	3324593	43457	mlaA	J417_14740	3284461	3285222	-1	phospholipid-binding lipoprotein MlaA
				3281136	3324593	43457		J417_14750	3285964	3287127	1	tyrosine-type recombinase/integrase
				3281136	3324593	43457		J417_14755	3287201	3289174	-1	hypothetical protein
				3281136	3324593	43457		J417_14760	3289852	3290178	-1	ogr/Delta-like zinc finger family protein
				3281136	3324593	43457		J417_14765	3290483	3293185	-1	DUF927 domain-containing protein
				3281136	3324593	43457		J417_14770	3293160	3293411	-1	hypothetical protein
				3281136	3324593	43457		J417_14775	3293404	3293595	-1	hypothetical protein
				3281136	3324593	43457		J417_14780	3293588	3293785	-1	host cell division inhibitor Icd-like protein
				3281136	3324593	43457		J417_14785	3294230	3294739	-1	capsid protein
				3281136	3324593	43457		J417_14790	3294747	3295742	-1	major capsid protein
				3281136	3324593	43457		J417_14795	3295781	3296638	-1	hypothetical protein
				3281136	3324593	43457		J417_14800	3296635	3296841	-1	AlpA family transcriptional regulator
				3281136	3324593	43457		J417_14805	3297375	3298166	-1	NPP1 family protein
				3281136	3324593	43457		J417_14810	3298795	3299601	1	5'-nucleotidase, lipoprotein e(P4) family
				3281136	3324593	43457		J417_14815	3299738	3301594	-1	avirulence protein
				3281136	3324593	43457	fepB	J417_14820	3302011	3303057	1	Fe2+-enterobactin ABC transporter substrate-binding protein
				3281136	3324593	43457	entS	J417_14825	3303086	3304369	-1	enterobactin transporter EntS
				3281136	3324593	43457	fepD	J417_14830	3304579	3305646	1	Fe(3+)-siderophore ABC transporter permease
				3281136	3324593	43457	fepG	J417_14835	3305657	3306691	1	iron-enterobactin ABC transporter permease
				3281136	3324593	43457		J417_14840	3306739	3307536	1	ABC transporter ATP-binding protein
				3281136	3324593	43457		J417_14845	3307976	3316549	-1	amino acid adenylation domain-containing protein
				3281136	3324593	43457		J417_14850	3316750	3316968	-1	MbtH family NRPS accessory protein
				3281136	3324593	43457	fes	J417_14855	3317003	3318295	-1	enterochelin esterase
				3281136	3324593	43457		J417_14860	3318607	3320817	1	TonB-dependent siderophore receptor
				3281136	3324593	43457		J417_14865	3320902	3322089	1	isochorismate synthase
				3281136	3324593	43457	entE	J417_14870	3322086	3323714	1	(2,3-dihydroxybenzoyl)adenylate synthase
				3281136	3324593	43457		J417_14875	3323718	3324593	1	isochorismatase
				3281136	3324593	43457	dhbA	J417_14880	3324590	3325348	1	2,3-dihydro-2,3-dihydroxybenzoate dehydrogenase
GI28				3485674	3489903	4229		J417_15620	3484943	3485722	-1	DUF3750 domain-containing protein
				3485674	3489903	4229		J417_15625	3485842	3487044	1	MFS transporter
				3485674	3489903	4229		J417_15630	3487249	3487995	1	MerR family transcriptional regulator
				3485674	3489903	4229		J417_15635	3488259	3488711	1	nuclear transport factor 2 family protein
				3485674	3489903	4229		J417_15640	3488708	3489427	1	SDR family NAD(P)-dependent oxidoreductase
				3485674	3489903	4229		J417_15645	3489424	3490686	1	FAD-dependent oxidoreductase
GI29				3710328	3714694	4366		J417_16710	3710762	3711526	1	SDR family oxidoreductase
				3710328	3714694	4366		J417_16715	3711553	3712440	1	methylated-DNA--[protein]-cysteine S-methyltransferase
				3710328	3714694	4366		J417_16720	3712455	3713663	-1	MFS transporter
				3710328	3714694	4366		J417_16725	3714118	3714576	1	hypothetical protein
GI30				3967261	3971953	4692		J417_17790	3967261	3967464	1	hypothetical protein
				3967261	3971953	4692		J417_17795	3967575	3967899	-1	helix-turn-helix domain-containing protein
				3967261	3971953	4692		J417_17800	3968070	3968840	1	transposase
				3967261	3971953	4692		J417_17805	3968871	3969986	-1	hypothetical protein
				3967261	3971953	4692		J417_17810	3970046	3971953	-1	NTPase
GI31				3968003	3973403	5400		J417_17800	3968070	3968840	1	transposase
				3968003	3973403	5400		J417_17805	3968871	3969986	-1	hypothetical protein
				3968003	3973403	5400		J417_17810	3970046	3971953	-1	NTPase
				3968003	3973403	5400		J417_17815	3972739	3973314	-1	flavin reductase family protein
				3968003	3973403	5400		J417_17820	3973357	3973986	-1	NAD-dependent dehydratase
GI32				4565476	4575026	9550		J417_20465	4565476	4566096	-1	tail fiber assembly protein
				4565476	4575026	9550		J417_20470	4566096	4567091	-1	phage tail protein
				4565476	4575026	9550		J417_20475	4567362	4568504	-1	phage tail protein
				4565476	4575026	9550		J417_20480	4568755	4569135	-1	phage tail protein
				4565476	4575026	9550		J417_20485	4569144	4570403	-1	phage tail protein
				4565476	4575026	9550		J417_20490	4570715	4572115	-1	phage tail protein
				4565476	4575026	9550		J417_20495	4572449	4572871	-1	tail assembly chaperone
				4565476	4575026	9550		J417_20500	4573429	4574181	-1	phage tail protein
				4565476	4575026	9550		J417_20505	4574538	4575026	1	hypothetical protein

## Sheet: MS2
Supplementary Table 4. Genomic features, constituent genes and gene annotations of predicated GIs within MS2.
GI N0.	Transposon	Repeats	Prophage	Island start	Island end	Length	Symbol	Locus	Gene start	Gene end	Strand	Product
GI1	gypsy：463449-464132	462965-463002;464142-464262		453758	473213	19455		C1O30_00005	1	4740052	1	hypothetical protein
				453758	473213	19455		C1O30_02065	453758	455266	-1	leucyl aminopeptidase
				453758	473213	19455		C1O30_02070	455549	456667	1	LPS export ABC transporter permease LptF
				453758	473213	19455		C1O30_02075	456669	457739	1	LPS export ABC transporter permease LptG
				453758	473213	19455		C1O30_02085	458266	459536	1	integrase
				453758	473213	19455		C1O30_02090	459645	462767	1	hypothetical protein
				453758	473213	19455		C1O30_02095	463063	464162	1	transposase
				453758	473213	19455		C1O30_02100	464666	465478	1	hypothetical protein
				453758	473213	19455		C1O30_02105	465818	466060	1	hypothetical protein
				453758	473213	19455		C1O30_02110	466304	467743	1	diguanylate cyclase
				453758	473213	19455		C1O30_02115	467864	468589	-1	SAM-dependent methyltransferase
				453758	473213	19455		C1O30_02120	469003	469857	1	nuclease PIN
				453758	473213	19455		C1O30_02125	470054	470392	-1	hypothetical protein
				453758	473213	19455		C1O30_02130	471000	471626	1	hypothetical protein
				453758	473213	19455		C1O30_02135	471773	472186	-1	hypothetical protein
				453758	473213	19455		C1O30_02140	472407	473213	1	hypothetical protein
GI2				474012	480796	6784		C1O30_00005	1	4740052	1	hypothetical protein
				474012	480796	6784		C1O30_02150	474012	474383	1	stress responsive protein
				474012	480796	6784		C1O30_02155	474694	475551	1	hypothetical protein
				474012	480796	6784		C1O30_02160	475606	476184	1	bacilysin biosynthesis protein BacA
				474012	480796	6784		C1O30_02165	476205	476396	1	hypothetical protein
				474012	480796	6784		C1O30_02170	476520	477137	-1	lysine transporter LysE
				474012	480796	6784		C1O30_02175	477325	477807	-1	very short patch repair endonuclease
				474012	480796	6784		C1O30_02180	477814	479244	-1	DNA (cytosine-5-)-methyltransferase
				474012	480796	6784		C1O30_02185	479483	480796	1	hypothetical protein
GI3				580333	584367	4034		C1O30_00005	1	4740052	1	hypothetical protein
				580333	584367	4034		C1O30_02645	580333	580626	1	DUF1778 domain-containing protein
				580333	584367	4034		C1O30_02650	580623	581111	1	GNAT family N-acetyltransferase
				580333	584367	4034		C1O30_02655	581269	583470	1	hypothetical protein
				580333	584367	4034		C1O30_02660	583841	584146	-1	plasmid maintenance protein CcdB
				580333	584367	4034		C1O30_02665	584149	584367	-1	hypothetical protein
GI4				713060	721063	8003		C1O30_00005	1	4740052	1	hypothetical protein
				713060	721063	8003	gmhA	C1O30_03280	713060	713641	1	phosphoheptose isomerase
				713060	721063	8003		C1O30_03285	713808	715196	1	mannose-1-phosphate guanylyltransferase/mannose-6-phosphate isomerase
				713060	721063	8003		C1O30_03290	715647	716441	1	ABC transporter permease
				713060	721063	8003		C1O30_03295	716444	717178	1	ABC transporter ATP-binding protein
				713060	721063	8003		C1O30_03300	717178	718497	1	hypothetical protein
				713060	721063	8003		C1O30_03305	718546	719685	1	glycosyltransferase family 1 protein
				713060	721063	8003		C1O30_03310	719693	720802	1	glycosyl transferase family 1
				713060	721063	8003		C1O30_03315	720956	721063	1	hypothetical protein
GI5	mariner_ant1：831575-832378	792750-792778;878202-878232	P1: C1O30_04025-C1O30_04090	779543	881515	101972		C1O30_00005	1	4740052	1	hypothetical protein
				779543	881515	101972		C1O30_03565	779543	780325	-1	ABC transporter substrate-binding protein
				779543	881515	101972		C1O30_03570	780452	780742	-1	hypothetical protein
				779543	881515	101972		C1O30_03575	781127	781249	1	methionine aminopeptidase
				779543	881515	101972		C1O30_03580	781235	781705	-1	MEKHLA domain-containing protein
				779543	881515	101972		C1O30_03585	782328	782561	-1	hypothetical protein
				779543	881515	101972		C1O30_03590	782561	782968	-1	hypothetical protein
				779543	881515	101972		C1O30_03595	783126	783875	-1	hypothetical protein
				779543	881515	101972		C1O30_03600	784713	784967	-1	transcriptional regulator
				779543	881515	101972		C1O30_03605	785579	786097	1	type VI secretion system tube protein Hcp
				779543	881515	101972		C1O30_03610	786210	788072	1	type VI secretion system tip protein VgrG
				779543	881515	101972		C1O30_03615	788150	788590	1	DUF1795 domain-containing protein
				779543	881515	101972		C1O30_03620	788608	792438	1	type IV secretion protein Rhs
				779543	881515	101972		C1O30_03625	792798	793643	1	toxin
				779543	881515	101972		C1O30_03630	794272	794567	1	type IV secretion protein Rhs
				779543	881515	101972		C1O30_03635	794962	795351	1	hypothetical protein
				779543	881515	101972		C1O30_03640	795836	797437	1	AAA family ATPase
				779543	881515	101972		C1O30_03645	797523	799322	-1	relaxase
				779543	881515	101972		C1O30_03650	799636	800022	1	hypothetical protein
				779543	881515	101972		C1O30_03655	800056	800241	-1	IS3 family transposase
				779543	881515	101972		C1O30_03660	800470	801531	-1	hypothetical protein
				779543	881515	101972		C1O30_03665	801724	802179	-1	hypothetical protein
				779543	881515	101972		C1O30_03670	802301	802849	-1	DNA polymerase III subunit epsilon
				779543	881515	101972		C1O30_03675	802943	803839	-1	ATPase
				779543	881515	101972		C1O30_03680	803839	804327	-1	hypothetical protein
				779543	881515	101972		C1O30_03685	804324	805268	-1	nucleotidyltransferase
				779543	881515	101972		C1O30_03690	805420	806319	1	WYL domain-containing protein
				779543	881515	101972		C1O30_03695	806625	807866	1	purine phosphorylase
				779543	881515	101972		C1O30_03700	807956	808396	1	hypothetical protein
				779543	881515	101972		C1O30_03705	808514	808879	1	DUF3742 domain-containing protein
				779543	881515	101972		C1O30_03710	808886	810409	-1	conjugal transfer protein TraG
				779543	881515	101972		C1O30_03715	810421	810771	-1	hypothetical protein
				779543	881515	101972		C1O30_03720	810768	812165	-1	integrating conjugative element protein
				779543	881515	101972		C1O30_03725	812176	813102	-1	TIGR03756 family integrating conjugative element protein
				779543	881515	101972		C1O30_03730	813102	813557	-1	TIGR03757 family integrating conjugative element protein
				779543	881515	101972		C1O30_03735	813709	814320	1	hypothetical protein
				779543	881515	101972		C1O30_03740	814313	814606	1	nucleotidyl transferase AbiEii/AbiGii toxin family protein
				779543	881515	101972		C1O30_03745	814606	814794	-1	IS3 family transposase
				779543	881515	101972		C1O30_03750	814898	815125	1	hypothetical protein
				779543	881515	101972		C1O30_03755	815221	816150	1	hypothetical protein
				779543	881515	101972		C1O30_03760	816167	817330	1	hypothetical protein
				779543	881515	101972		C1O30_03765	817347	818312	1	hypothetical protein
				779543	881515	101972		C1O30_03770	818309	819211	1	tetrahydrodipicolinate succinyltransferase
				779543	881515	101972		C1O30_03775	819186	819953	1	hypothetical protein
				779543	881515	101972		C1O30_03780	819950	821218	1	hypothetical protein
				779543	881515	101972		C1O30_03785	821267	822433	1	hypothetical protein
				779543	881515	101972		C1O30_03790	822435	823016	1	hypothetical protein
				779543	881515	101972		C1O30_03795	823357	826203	-1	conjugative transfer ATPase
				779543	881515	101972		C1O30_03800	826203	826640	-1	TIGR03751 family conjugal transfer lipoprotein
				779543	881515	101972		C1O30_03805	826621	828021	-1	TIGR03752 family integrating conjugative element protein
				779543	881515	101972		C1O30_03810	828011	828904	-1	TIGR03749 family integrating conjugative element protein
				779543	881515	101972		C1O30_03815	828901	829581	-1	TIGR03746 family integrating conjugative element protein
				779543	881515	101972		C1O30_03820	829578	829976	-1	TIGR03750 family conjugal transfer protein
				779543	881515	101972		C1O30_03825	829989	830348	-1	TIGR03745 family integrating conjugative element membrane protein
				779543	881515	101972		C1O30_03830	830367	830600	-1	TIGR03758 family integrating conjugative element protein
				779543	881515	101972		C1O30_03835	830597	830983	-1	hypothetical protein
				779543	881515	101972		C1O30_03840	831473	832504	-1	IS630 family transposase
				779543	881515	101972		C1O30_03845	832673	833503	1	hypothetical protein
				779543	881515	101972		C1O30_03850	833618	834367	-1	TIGR03747 family integrating conjugative element membrane protein
				779543	881515	101972	traD	C1O30_03855	834364	836523	-1	conjugative coupling factor TraD, PFGI-1 class
				779543	881515	101972		C1O30_03860	836528	837067	-1	integrating conjugative element protein
				779543	881515	101972		C1O30_03865	837064	837654	-1	lytic transglycosylase
				779543	881515	101972		C1O30_03870	837636	838343	-1	TIGR03759 family integrating conjugative element protein
				779543	881515	101972		C1O30_03875	838355	839005	-1	hypothetical protein
				779543	881515	101972		C1O30_03880	839002	839571	-1	integrating conjugative element protein pill, pfgi-1
				779543	881515	101972		C1O30_03885	840123	841256	1	HNH endonuclease
				779543	881515	101972		C1O30_03890	841413	842414	-1	hypothetical protein
				779543	881515	101972		C1O30_03895	842780	843580	1	hypothetical protein
				779543	881515	101972		C1O30_03900	844573	846852	-1	DEAD/DEAH box helicase
				779543	881515	101972		C1O30_03905	846988	848097	-1	SAM-dependent methyltransferase
				779543	881515	101972		C1O30_03910	848167	848811	-1	hypothetical protein
				779543	881515	101972		C1O30_03915	848930	849274	-1	hypothetical protein
				779543	881515	101972		C1O30_03920	849365	850027	-1	hypothetical protein
				779543	881515	101972		C1O30_03925	850110	851576	-1	hypothetical protein
				779543	881515	101972		C1O30_03930	852267	852866	1	hypothetical protein
				779543	881515	101972		C1O30_03935	853009	854625	1	Patatin
				779543	881515	101972		C1O30_03940	854691	855536	1	hypothetical protein
				779543	881515	101972		C1O30_03945	855561	856703	1	TIR domain-containing protein
				779543	881515	101972		C1O30_03950	856707	857294	1	hypothetical protein
				779543	881515	101972		C1O30_03955	857554	858132	1	hypothetical protein
				779543	881515	101972		C1O30_03960	858411	858485	1	histidine biosynthesis protein HisIE
				779543	881515	101972		C1O30_03965	858699	859064	-1	hypothetical protein
				779543	881515	101972		C1O30_03970	859213	860010	-1	GTPase
				779543	881515	101972		C1O30_03975	860396	861868	-1	DNA cytosine methyltransferase
				779543	881515	101972		C1O30_03980	862393	864405	-1	DNA topoisomerase III
				779543	881515	101972		C1O30_03985	864533	864640	-1	single-stranded DNA-binding protein
				779543	881515	101972		C1O30_03990	864731	865261	-1	integrase
				779543	881515	101972		C1O30_03995	865258	866076	-1	TIGR03761 family integrating conjugative element protein
				779543	881515	101972		C1O30_04000	866260	867474	-1	hypothetical protein
				779543	881515	101972		C1O30_04005	867474	868034	-1	coproporphyrinogen III oxidase
				779543	881515	101972		C1O30_04010	868046	869770	-1	hypothetical protein
				779543	881515	101972		C1O30_04015	869778	870023	-1	hypothetical protein
				779543	881515	101972		C1O30_04020	870007	870836	-1	chromosome partitioning protein
				779543	881515	101972		C1O30_04025	870870	871082	-1	AlpA family phage regulatory protein
				779543	881515	101972		C1O30_04030	871791	872558	-1	hypothetical protein
				779543	881515	101972		C1O30_04035	872747	873622	-1	transposase
				779543	881515	101972		C1O30_04040	873823	874971	1	IS3 family transposase
				779543	881515	101972		C1O30_04045	875011	876294	-1	integrase
				779543	881515	101972	smpB	C1O30_04055	876820	877302	-1	SsrA-binding protein SmpB
				779543	881515	101972		C1O30_04060	877458	877892	1	ubiquinone-binding protein
				779543	881515	101972		C1O30_04065	877885	878178	1	RnfH family protein
				779543	881515	101972		C1O30_04070	878250	878594	-1	outer membrane protein assembly factor BamE
				779543	881515	101972		C1O30_04075	878706	880367	-1	DNA repair protein RecN
				779543	881515	101972		C1O30_04080	880451	881329	-1	NAD(+) kinase
				779543	881515	101972		C1O30_04085	881345	881515	-1	inorganic polyphosphate kinase
				779543	881515	101972		C1O30_04090	881480	882067	1	nucleotide exchange factor GrpE
GI6	gypsy：996565-996981			992887	997729	4842		C1O30_00005	1	4740052	1	hypothetical protein
				992887	997729	4842		C1O30_04565	992887	993414	-1	AAA family ATPase
				992887	997729	4842		C1O30_04570	993645	994751	-1	iron ABC transporter substrate-binding protein
				992887	997729	4842		C1O30_04575	995240	995956	-1	ATP-binding protein
				992887	997729	4842		C1O30_04580	996026	997146	1	IS3 family transposase
				992887	997729	4842		C1O30_04585	997220	997729	1	hypothetical protein
GI7		1005499-1005525		997745	1009936	12191		C1O30_00005	1	4740052	1	hypothetical protein
				997745	1009936	12191		C1O30_04590	997745	998224	1	DNA repair protein RadC
				997745	1009936	12191		C1O30_04595	998322	998609	1	hypothetical protein
				997745	1009936	12191		C1O30_04600	998702	999622	1	hypothetical protein
				997745	1009936	12191		C1O30_04605	999631	999948	1	hypothetical protein
				997745	1009936	12191		C1O30_04610	1000049	1000732	1	integrase
				997745	1009936	12191		C1O30_04615	1000891	1001193	1	DNA-binding protein
				997745	1009936	12191		C1O30_04620	1001190	1003277	1	hypothetical protein
				997745	1009936	12191		C1O30_04625	1003270	1004355	1	cytosine methyltransferase
				997745	1009936	12191		C1O30_04630	1004468	1005499	-1	hypothetical protein
				997745	1009936	12191		C1O30_04635	1005641	1007143	1	DNA helicase
				997745	1009936	12191		C1O30_04640	1007227	1008822	1	relaxase
				997745	1009936	12191		C1O30_04645	1008914	1009936	1	recombinase XerD
GI8				1087578	1095732	8154		C1O30_00005	1	4740052	1	hypothetical protein
				1087578	1095732	8154	mutS	C1O30_05015	1085045	1087603	-1	DNA mismatch repair protein MutS
				1087578	1095732	8154		C1O30_05020	1088280	1089050	1	hypothetical protein
				1087578	1095732	8154		C1O30_05025	1089082	1089948	1	2-methylisocitrate lyase
				1087578	1095732	8154		C1O30_05030	1089948	1090871	1	3-oxoacyl-ACP synthase
				1087578	1095732	8154		C1O30_05035	1090868	1093054	1	hypothetical protein
				1087578	1095732	8154		C1O30_05040	1093133	1094326	1	acyl-CoA dehydrogenase
				1087578	1095732	8154		C1O30_05045	1094323	1095462	1	cytochrome P450
				1087578	1095732	8154		C1O30_05050	1095482	1096804	1	hypothetical protein
GI9				1101665	1110016	8351		C1O30_00005	1	4740052	1	hypothetical protein
				1101665	1110016	8351		C1O30_05070	1100544	1102775	1	methionine--tRNA ligase
				1101665	1110016	8351		C1O30_05075	1102772	1106026	1	non-ribosomal peptide synthetase
				1101665	1110016	8351		C1O30_05080	1106023	1107537	1	AMP-dependent synthetase
				1101665	1110016	8351		C1O30_05085	1107527	1107799	1	hypothetical protein
				1101665	1110016	8351		C1O30_05090	1107840	1108454	1	GNAT family N-acetyltransferase
				1101665	1110016	8351		C1O30_05095	1108451	1109479	1	peptidase C45
				1101665	1110016	8351		C1O30_05100	1109501	1109974	1	peroxiredoxin
GI10				1116438	1126817	10379		C1O30_00005	1	4740052	1	hypothetical protein
				1116438	1126817	10379		C1O30_05135	1116438	1117226	-1	hypothetical protein
				1116438	1126817	10379		C1O30_05140	1117232	1117801	-1	GNAT family N-acetyltransferase
				1116438	1126817	10379		C1O30_05145	1117823	1119160	-1	hypothetical protein
				1116438	1126817	10379		C1O30_05150	1119163	1119831	-1	hypothetical protein
				1116438	1126817	10379		C1O30_05155	1119835	1120989	-1	hypothetical protein
				1116438	1126817	10379		C1O30_05160	1120983	1124012	-1	hypothetical protein
				1116438	1126817	10379		C1O30_05165	1124039	1124872	-1	DUF692 domain-containing protein
				1116438	1126817	10379		C1O30_05170	1124869	1125417	-1	hypothetical protein
				1116438	1126817	10379		C1O30_05175	1125456	1125716	-1	hypothetical protein
				1116438	1126817	10379		C1O30_05180	1125732	1126817	-1	molybdopterin biosynthesis protein MoeB
GI11				1479284	1483725	4441		C1O30_00005	1	4740052	1	hypothetical protein
				1479284	1483725	4441		C1O30_06780	1479284	1480654	1	phospholipase
				1479284	1483725	4441		C1O30_06785	1480654	1481433	1	ankyrin repeat domain-containing protein
				1479284	1483725	4441		C1O30_06790	1481430	1482197	1	ankyrin repeat domain-containing protein
				1479284	1483725	4441		C1O30_06795	1482194	1482961	1	hypothetical protein
				1479284	1483725	4441		C1O30_06800	1482958	1483725	1	hypothetical protein
GI12				1538269	1542514	4245		C1O30_00005	1	4740052	1	hypothetical protein
				1538269	1542514	4245		C1O30_07025	1537238	1538358	-1	IS3 family transposase
				1538269	1542514	4245		C1O30_07030	1538269	1538487	1	hypothetical protein
				1538269	1542514	4245		C1O30_07035	1538615	1539766	1	NADH:flavin oxidoreductase
				1538269	1542514	4245		C1O30_07040	1539943	1540347	1	DUF4440 domain-containing protein
				1538269	1542514	4245		C1O30_07045	1540565	1540651	-1	resolvase
				1538269	1542514	4245		C1O30_07050	1540755	1541930	-1	MFS transporter
				1538269	1542514	4245		C1O30_07055	1542014	1542514	1	Lrp/AsnC family transcriptional regulator
GI13				1639884	1644069	4185		C1O30_00005	1	4740052	1	hypothetical protein
				1639884	1644069	4185		C1O30_07380	1639568	1639915	-1	HNH endonuclease
				1639884	1644069	4185		C1O30_07385	1640034	1640978	-1	EamA/RhaT family transporter
				1639884	1644069	4185		C1O30_07390	1641100	1641555	1	Lrp/AsnC family transcriptional regulator
				1639884	1644069	4185		C1O30_07395	1641785	1641877	-1	hypothetical protein
				1639884	1644069	4185		C1O30_07400	1642035	1642991	-1	nitronate monooxygenase
				1639884	1644069	4185		C1O30_07405	1643094	1643963	1	LysR family transcriptional regulator
GI14			P2: C1O30_07575-C1O30_07670	1664299	1695074	30775		C1O30_00005	1	4740052	1	hypothetical protein
				1664299	1695074	30775		C1O30_07490	1664299	1664535	1	antitoxin
				1664299	1695074	30775		C1O30_07495	1664538	1664852	1	plasmid maintenance protein CcdB
				1664299	1695074	30775		C1O30_07500	1664849	1665103	-1	mobilization protein mobC
				1664299	1695074	30775		C1O30_07505	1665246	1666049	-1	4-carboxymuconolactone decarboxylase
				1664299	1695074	30775		C1O30_07510	1666065	1666775	-1	antibiotic biosynthesis monooxygenase
				1664299	1695074	30775		C1O30_07515	1666820	1667839	-1	aldo/keto reductase
				1664299	1695074	30775		C1O30_07520	1667858	1668415	-1	NAD(P)H dehydrogenase
				1664299	1695074	30775		C1O30_07525	1668568	1669602	-1	amidohydrolase
				1664299	1695074	30775		C1O30_07530	1669705	1670652	-1	aldo/keto reductase
				1664299	1695074	30775		C1O30_07535	1670736	1671425	-1	type 1 glutamine amidotransferase domain-containing protein
				1664299	1695074	30775		C1O30_07540	1671440	1671742	-1	superoxide dismutase
				1664299	1695074	30775		C1O30_07545	1671882	1672781	1	LysR family transcriptional regulator
				1664299	1695074	30775		C1O30_07550	1673099	1673563	-1	hypothetical protein
				1664299	1695074	30775		C1O30_07555	1673572	1673862	-1	hypothetical protein
				1664299	1695074	30775		C1O30_07560	1673873	1674148	-1	conjugal transfer protein
				1664299	1695074	30775		C1O30_07565	1674168	1674815	-1	transglycosylase
				1664299	1695074	30775		C1O30_07570	1674885	1675121	-1	hypothetical protein
				1664299	1695074	30775		C1O30_07575	1675726	1676610	-1	HNH endonuclease
				1664299	1695074	30775		C1O30_07580	1676610	1678094	-1	ATPase
				1664299	1695074	30775		C1O30_07585	1678442	1678651	-1	conjugal transfer protein TraR
				1664299	1695074	30775		C1O30_07590	1678641	1679225	-1	hypothetical protein
				1664299	1695074	30775		C1O30_07595	1679243	1679437	-1	DNA-binding protein
				1664299	1695074	30775		C1O30_07600	1679932	1680189	-1	XRE family transcriptional regulator
				1664299	1695074	30775		C1O30_07605	1680303	1680581	-1	transcriptional regulator
				1664299	1695074	30775		C1O30_07610	1680689	1680958	1	transcriptional regulator
				1664299	1695074	30775		C1O30_07615	1681246	1681479	1	hypothetical protein
				1664299	1695074	30775		C1O30_07620	1681664	1682182	1	type VI secretion system tube protein Hcp
				1664299	1695074	30775		C1O30_07625	1682296	1684149	1	type VI secretion system tip protein VgrG
				1664299	1695074	30775		C1O30_07630	1684163	1684570	1	DUF1795 domain-containing protein
				1664299	1695074	30775		C1O30_07635	1684582	1688541	1	type IV secretion protein Rhs
				1664299	1695074	30775		C1O30_07640	1688957	1689436	1	hypothetical protein
				1664299	1695074	30775		C1O30_07645	1689544	1690681	1	type IV secretion protein Rhs
				1664299	1695074	30775		C1O30_07650	1690678	1691235	1	hypothetical protein
				1664299	1695074	30775		C1O30_07655	1691519	1692445	-1	hypothetical protein
				1664299	1695074	30775		C1O30_07660	1693123	1693446	1	hypothetical protein
				1664299	1695074	30775		C1O30_07665	1693474	1693635	1	DUF736 domain-containing protein
				1664299	1695074	30775		C1O30_07670	1693791	1695074	-1	integrase
GI15				1779648	1785030	5382		C1O30_00005	1	4740052	1	hypothetical protein
				1779648	1785030	5382		C1O30_08050	1779648	1780532	1	FAA hydrolase family protein
				1779648	1785030	5382	citC	C1O30_08055	1780608	1781657	1	[citrate (pro-3S)-lyase] ligase
				1779648	1785030	5382	citD	C1O30_08060	1781692	1781982	1	citrate lyase acyl carrier protein
				1779648	1785030	5382	citE	C1O30_08065	1781982	1782872	1	citrate (pro-3S)-lyase subunit beta
				1779648	1785030	5382	citF	C1O30_08070	1782962	1784491	1	citrate lyase subunit alpha
				1779648	1785030	5382	citX	C1O30_08075	1784488	1785030	1	citrate lyase holo-[acyl-carrier protein] synthase
GI16				1855099	1859768	4669		C1O30_00005	1	4740052	1	hypothetical protein
				1855099	1859768	4669		C1O30_08405	1855404	1856390	-1	NAD-dependent epimerase
				1855099	1859768	4669		C1O30_08410	1856487	1857398	1	LysR family transcriptional regulator
				1855099	1859768	4669		C1O30_08415	1857442	1858734	-1	D-amino-acid oxidase
				1855099	1859768	4669		C1O30_08420	1858756	1859178	-1	RidA family protein
				1855099	1859768	4669		C1O30_08425	1859194	1860333	-1	ornithine cyclodeaminase
GI17		1871086-1871169		1864003	1905987	41984		C1O30_00005	1	4740052	1	hypothetical protein
				1864003	1905987	41984		C1O30_08445	1864003	1864401	1	hypothetical protein
				1864003	1905987	41984		C1O30_08450	1864385	1864588	1	hypothetical protein
				1864003	1905987	41984		C1O30_08455	1864987	1865862	1	hypothetical protein
				1864003	1905987	41984		C1O30_08460	1866054	1866272	1	AlpA family transcriptional regulator
				1864003	1905987	41984		C1O30_08465	1866293	1866625	1	hypothetical protein
				1864003	1905987	41984		C1O30_08470	1866700	1866990	1	hypothetical protein
				1864003	1905987	41984		C1O30_08475	1867048	1867413	1	hypothetical protein
				1864003	1905987	41984		C1O30_08480	1867477	1867731	1	DNA-binding protein
				1864003	1905987	41984		C1O30_08485	1867839	1868351	1	GrpB family protein
				1864003	1905987	41984		C1O30_08490	1868370	1868597	-1	hypothetical protein
				1864003	1905987	41984		C1O30_08495	1868736	1869215	-1	DUF4756 domain-containing protein
				1864003	1905987	41984		C1O30_08500	1869399	1870199	-1	hypothetical protein
				1864003	1905987	41984		C1O30_08505	1870227	1870961	-1	DNA-binding protein
				1864003	1905987	41984		C1O30_08510	1871871	1872140	1	hypothetical protein
				1864003	1905987	41984		C1O30_08515	1872246	1872566	1	hypothetical protein
				1864003	1905987	41984		C1O30_08520	1872804	1873268	1	hypothetical protein
				1864003	1905987	41984		C1O30_08525	1873361	1874146	1	HNH endonuclease
				1864003	1905987	41984		C1O30_08530	1874543	1874911	1	DNA mismatch repair protein MutT
				1864003	1905987	41984		C1O30_08535	1875469	1875723	-1	plasmid replication protein
				1864003	1905987	41984		C1O30_08540	1875720	1876589	-1	replication protein
				1864003	1905987	41984		C1O30_08545	1877225	1877719	1	hypothetical protein
				1864003	1905987	41984		C1O30_08550	1877776	1880439	1	hypothetical protein
				1864003	1905987	41984		C1O30_08555	1880470	1881291	-1	hypothetical protein
				1864003	1905987	41984		C1O30_08560	1881472	1881825	1	hypothetical protein
				1864003	1905987	41984		C1O30_08565	1881822	1882949	1	hypothetical protein
				1864003	1905987	41984		C1O30_08570	1883123	1884373	1	hypothetical protein
				1864003	1905987	41984		C1O30_08575	1884659	1884820	-1	DNA-binding protein
				1864003	1905987	41984		C1O30_08580	1885082	1885558	-1	hypothetical protein
				1864003	1905987	41984		C1O30_08585	1885768	1886091	-1	hypothetical protein
				1864003	1905987	41984		C1O30_08590	1886266	1886461	1	hypothetical protein
				1864003	1905987	41984		C1O30_08595	1886466	1887020	1	DNA-directed RNA polymerase subunit beta
				1864003	1905987	41984		C1O30_08600	1887038	1887694	1	hypothetical protein
				1864003	1905987	41984		C1O30_08605	1887765	1889630	-1	hypothetical protein
				1864003	1905987	41984		C1O30_08610	1890257	1890973	1	hypothetical protein
				1864003	1905987	41984		C1O30_08615	1891139	1892449	-1	conjugal transfer protein
				1864003	1905987	41984		C1O30_08620	1893310	1893504	1	hypothetical protein
				1864003	1905987	41984		C1O30_08625	1894194	1894856	1	hypothetical protein
				1864003	1905987	41984		C1O30_08630	1894859	1895269	1	hypothetical protein
				1864003	1905987	41984		C1O30_08635	1895260	1895892	1	hypothetical protein
				1864003	1905987	41984		C1O30_08640	1896417	1896674	1	hypothetical protein
				1864003	1905987	41984		C1O30_08645	1896671	1896955	1	conjugal transfer protein TraD
				1864003	1905987	41984		C1O30_08650	1897126	1897440	1	hypothetical protein
				1864003	1905987	41984		C1O30_08655	1897435	1897983	-1	hypothetical protein
				1864003	1905987	41984		C1O30_08660	1898065	1898466	-1	DNA-binding protein
				1864003	1905987	41984		C1O30_08665	1898650	1900140	1	shufflon system plasmid conjugative transfer pilus tip adhesin PilV
				1864003	1905987	41984		C1O30_08670	1900856	1901110	1	hypothetical protein
				1864003	1905987	41984		C1O30_08675	1901105	1901719	-1	hypothetical protein
				1864003	1905987	41984		C1O30_08680	1902188	1902844	-1	NAD-dependent epimerase
				1864003	1905987	41984		C1O30_08685	1903124	1904506	1	MFS transporter
				1864003	1905987	41984		C1O30_08690	1904701	1905987	-1	integrase
GI18				2150290	2155133	4843		C1O30_00005	1	4740052	1	hypothetical protein
				2150290	2155133	4843		C1O30_09795	2150290	2151174	1	5-oxopent-3-ene-1,2,5-tricarboxylate decarboxylase
				2150290	2155133	4843	citC	C1O30_09800	2151250	2152299	1	[citrate (pro-3S)-lyase] ligase
				2150290	2155133	4843	citD	C1O30_09805	2152334	2152624	1	citrate lyase acyl carrier protein
				2150290	2155133	4843	citE	C1O30_09810	2152624	2153514	1	citrate (pro-3S)-lyase subunit beta
				2150290	2155133	4843	citF	C1O30_09815	2153604	2155133	1	citrate lyase subunit alpha
				2150290	2155133	4843	citX	C1O30_09820	2155130	2155672	1	citrate lyase holo-[acyl-carrier protein] synthase
GI19				2355136	2359277	4141		C1O30_00005	1	4740052	1	hypothetical protein
				2355136	2359277	4141		C1O30_10760	2355136	2355480	-1	MmcQ protein
				2355136	2359277	4141		C1O30_10765	2355584	2356588	-1	acyltransferase
				2355136	2359277	4141		C1O30_10770	2357319	2358287	1	dicarboxylate transporter/tellurite-resistance protein TehA
				2355136	2359277	4141		C1O30_10775	2358582	2359277	1	Expansin-YoaJ
GI20		2559718-2559743		2554785	2559736	4951		C1O30_00005	1	4740052	1	hypothetical protein
				2554785	2559736	4951		C1O30_11590	2554881	2557472	-1	hypothetical protein
				2554785	2559736	4951		C1O30_11595	2557476	2560040	-1	hypothetical protein
GI21				2939954	2954097	14143		C1O30_00005	1	4740052	1	hypothetical protein
				2939954	2954097	14143		C1O30_13265	2939954	2941363	-1	hypothetical protein
				2939954	2954097	14143		C1O30_13270	2941486	2942682	-1	hypothetical protein
				2939954	2954097	14143		C1O30_13275	2942666	2943751	-1	acyl-protein synthetase
				2939954	2954097	14143		C1O30_13280	2943741	2945147	-1	AMP-dependent synthetase
				2939954	2954097	14143		C1O30_13285	2945150	2946118	-1	transketolase
				2939954	2954097	14143		C1O30_13290	2946118	2946927	-1	transketolase
				2939954	2954097	14143		C1O30_13295	2946924	2947667	-1	3-oxoacyl-ACP reductase
				2939954	2954097	14143		C1O30_13300	2947683	2948426	-1	3-oxoacyl-ACP reductase
				2939954	2954097	14143		C1O30_13305	2948436	2948672	-1	acyl carrier protein
				2939954	2954097	14143		C1O30_13310	2948762	2949418	-1	sugar O-acyltransferase
				2939954	2954097	14143		C1O30_13315	2949430	2950551	-1	aminotransferase
				2939954	2954097	14143		C1O30_13320	2950666	2954097	-1	methyltransferase type 12
GI22				3004024	3008511	4487		C1O30_00005	1	4740052	1	hypothetical protein
				3004024	3008511	4487		C1O30_13580	3004024	3005310	1	endoglucanase
				3004024	3008511	4487		C1O30_13585	3005384	3006661	-1	pectate lyase
				3004024	3008511	4487		C1O30_13590	3007282	3007593	1	holin
				3004024	3008511	4487		C1O30_13595	3007583	3008074	1	lysozyme
				3004024	3008511	4487		C1O30_13600	3008071	3008511	1	hypothetical protein
GI23	gypsy:3335902-3336531			3320213	3339039	18826		C1O30_00005	1	4740052	1	hypothetical protein
				3320213	3339039	18826		C1O30_14960	3320213	3320992	1	hydroxypyruvate isomerase
				3320213	3339039	18826		C1O30_14965	3321207	3322454	1	MFS transporter
				3320213	3339039	18826		C1O30_14970	3322476	3323546	1	sugar phosphate isomerase/epimerase
				3320213	3339039	18826		C1O30_14975	3323543	3324697	1	gfo/Idh/MocA family oxidoreductase
				3320213	3339039	18826		C1O30_14980	3324800	3325780	1	LacI family transcriptional regulator
				3320213	3339039	18826		C1O30_14985	3325990	3326844	-1	sugar phosphate isomerase/epimerase
				3320213	3339039	18826	thiD	C1O30_14990	3327271	3328074	-1	bifunctional hydroxymethylpyrimidine kinase/phosphomethylpyrimidine kinase
				3320213	3339039	18826		C1O30_14995	3328071	3328865	-1	hydroxyethylthiazole kinase
				3320213	3339039	18826		C1O30_15000	3329872	3331080	1	IS256 family transposase
				3320213	3339039	18826		C1O30_15005	3331124	3332353	-1	hypothetical protein
				3320213	3339039	18826		C1O30_15010	3332330	3334024	1	zinc ribbon domain-containing protein
				3320213	3339039	18826		C1O30_15015	3334021	3334881	1	hypothetical protein
				3320213	3339039	18826		C1O30_15020	3335207	3335812	-1	integrase
				3320213	3339039	18826		C1O30_15025	3335842	3336962	-1	IS3 family transposase
				3320213	3339039	18826		C1O30_15030	3336873	3337088	1	hypothetical protein
				3320213	3339039	18826		C1O30_15035	3337035	3337733	-1	integrase
				3320213	3339039	18826		C1O30_15040	3337991	3338161	1	NAD(P)H dehydrogenase
				3320213	3339039	18826		C1O30_15045	3338143	3339039	-1	LysR family transcriptional regulator
GI24				3354265	3358795	4530		C1O30_00005	1	4740052	1	hypothetical protein
				3354265	3358795	4530		C1O30_15135	3354265	3355392	-1	hypothetical protein
				3354265	3358795	4530		C1O30_15140	3355991	3356377	1	thioesterase
				3354265	3358795	4530		C1O30_15145	3356652	3357029	-1	antibiotic biosynthesis monooxygenase
				3354265	3358795	4530		C1O30_15150	3357128	3358021	-1	NAD(P)/FAD-dependent oxidoreductase
				3354265	3358795	4530		C1O30_15155	3358148	3358795	1	TetR family transcriptional regulator
GI25				3573131	3599277	26146		C1O30_00005	1	4740052	1	hypothetical protein
				3573131	3599277	26146		C1O30_16185	3573131	3573604	-1	hypothetical protein
				3573131	3599277	26146		C1O30_16190	3573635	3574456	-1	DUF945 domain-containing protein
				3573131	3599277	26146		C1O30_16195	3574553	3575419	-1	hypothetical protein
				3573131	3599277	26146		C1O30_16200	3576156	3576647	1	hypothetical protein
				3573131	3599277	26146		C1O30_16205	3576651	3577817	1	hypothetical protein
				3573131	3599277	26146		C1O30_16210	3577795	3579678	1	hypothetical protein
				3573131	3599277	26146		C1O30_16215	3579503	3580174	1	hypothetical protein
				3573131	3599277	26146		C1O30_16220	3580403	3581005	1	DUF1819 domain-containing protein
				3573131	3599277	26146		C1O30_16225	3581002	3581604	1	DUF1788 domain-containing protein
				3573131	3599277	26146	brxC	C1O30_16230	3581616	3585257	1	BREX system P-loop protein BrxC
				3573131	3599277	26146		C1O30_16235	3585303	3588998	1	SAM-dependent methyltransferase
				3573131	3599277	26146		C1O30_16240	3589196	3591793	1	BREX-1 system phosphatase PglZ type A
				3573131	3599277	26146		C1O30_16245	3591804	3593888	1	BREX system Lon protease-like protein BrxL
				3573131	3599277	26146		C1O30_16250	3593899	3594740	-1	IS5 family transposase
				3573131	3599277	26146		C1O30_16255	3595000	3595623	-1	inovirus Gp2 family protein
				3573131	3599277	26146		C1O30_16260	3595851	3597260	-1	hypothetical protein
				3573131	3599277	26146		C1O30_16265	3597389	3597625	-1	AlpA family phage regulatory protein
				3573131	3599277	26146		C1O30_16270	3597732	3598742	-1	hypothetical protein
				3573131	3599277	26146		C1O30_16275	3599011	3599143	1	hypothetical protein
				3573131	3599277	26146		C1O30_16280	3599140	3599277	-1	cell filamentation protein Fic
GI26	gypsy:3845641-3846264	3835073-3835220		3821427	3856246	34819		C1O30_00005	1	4740052	1	hypothetical protein
				3821427	3856246	34819		C1O30_17265	3821427	3822041	1	YitT family protein
				3821427	3856246	34819		C1O30_17270	3822082	3823275	1	aspartate/tyrosine/aromatic aminotransferase
				3821427	3856246	34819		C1O30_17275	3823481	3823706	1	hypothetical protein
				3821427	3856246	34819	cas6f	C1O30_17280	3825269	3825823	-1	type I-F CRISPR-associated endoribonuclease Cas6/Csy4
				3821427	3856246	34819	csy3	C1O30_17285	3825828	3826880	-1	type I-F CRISPR-associated protein Csy3
				3821427	3856246	34819	csy2	C1O30_17290	3826897	3827850	-1	type I-F CRISPR-associated protein Csy2
				3821427	3856246	34819	csy1	C1O30_17295	3827847	3829184	-1	type I-F CRISPR-associated protein Csy1
				3821427	3856246	34819		C1O30_17300	3829249	3829428	1	hypothetical protein
				3821427	3856246	34819	cas3f	C1O30_17305	3829597	3832878	-1	type I-F CRISPR-associated helicase Cas3
				3821427	3856246	34819		C1O30_17310	3832875	3833876	-1	subtype I-F CRISPR-associated endonuclease Cas1
				3821427	3856246	34819		C1O30_17315	3836214	3837884	-1	methyl-accepting chemotaxis protein
				3821427	3856246	34819		C1O30_17320	3838886	3840454	1	GGDEF domain-containing protein
				3821427	3856246	34819		C1O30_17325	3840498	3840917	-1	YjbQ family protein
				3821427	3856246	34819		C1O30_17330	3841084	3841313	1	hypothetical protein
				3821427	3856246	34819		C1O30_17335	3841340	3844171	-1	excinuclease ABC subunit UvrA
				3821427	3856246	34819		C1O30_17340	3844414	3844962	1	single-stranded DNA-binding protein
				3821427	3856246	34819		C1O30_17345	3845210	3846330	1	IS3 family transposase
				3821427	3856246	34819		C1O30_17350	3846330	3846515	1	hypothetical protein
				3821427	3856246	34819		C1O30_17355	3846567	3847916	1	reverse transcriptase
				3821427	3856246	34819		C1O30_17360	3847909	3849951	1	ABC transporter ATP-binding protein
				3821427	3856246	34819		C1O30_17365	3850192	3850404	-1	hypothetical protein
				3821427	3856246	34819		C1O30_17370	3850677	3853832	-1	DEAD/DEAH box helicase
				3821427	3856246	34819		C1O30_17375	3853822	3854640	-1	DUF1837 domain-containing protein
				3821427	3856246	34819		C1O30_17380	3854999	3855574	-1	flavin reductase
				3821427	3856246	34819		C1O30_17385	3855617	3856246	-1	NAD-dependent dehydratase
				3846330	3854640	8310		C1O30_00005	1	4740052	1	hypothetical protein
				3846330	3854640	8310		C1O30_17350	3846330	3846515	1	hypothetical protein
				3846330	3854640	8310		C1O30_17355	3846567	3847916	1	reverse transcriptase
				3846330	3854640	8310		C1O30_17360	3847909	3849951	1	ABC transporter ATP-binding protein
				3846330	3854640	8310		C1O30_17365	3850192	3850404	-1	hypothetical protein
				3846330	3854640	8310		C1O30_17370	3850677	3853832	-1	DEAD/DEAH box helicase
				3846330	3854640	8310		C1O30_17375	3853822	3854640	-1	DUF1837 domain-containing protein
GI27		4168706-4168741		4161875	4169818	7943		C1O30_00005	1	4740052	1	hypothetical protein
				4161875	4169818	7943		C1O30_18650	4161875	4162312	-1	IS200/IS605 family transposase
				4161875	4169818	7943		C1O30_18680	4167766	4168032	-1	hypothetical protein
				4161875	4169818	7943		C1O30_18685	4168137	4168682	1	gamma carbonic anhydrase family protein
				4161875	4169818	7943		C1O30_18690	4168722	4168994	-1	DUF1488 domain-containing protein
				4161875	4169818	7943		C1O30_18695	4168991	4169818	-1	shikimate dehydrogenase
GI28				4234939	4239609	4670		C1O30_00005	1	4740052	1	hypothetical protein
				4234939	4239609	4670		C1O30_19120	4234939	4235092	-1	transcriptional regulator
				4234939	4239609	4670		C1O30_19125	4235102	4235386	-1	XRE family transcriptional regulator
				4234939	4239609	4670		C1O30_19130	4235483	4235677	-1	transcriptional regulator
				4234939	4239609	4670		C1O30_19135	4235890	4236249	1	type II toxin-antitoxin system RelE/ParE family toxin
				4234939	4239609	4670		C1O30_19140	4236233	4236556	1	transcriptional regulator
				4234939	4239609	4670		C1O30_19145	4236760	4238262	-1	ATP-dependent endonuclease
				4234939	4239609	4670		C1O30_19150	4238266	4238586	-1	hypothetical protein
				4234939	4239609	4670		C1O30_19155	4239017	4239162	-1	integrase
				4234939	4239609	4670		C1O30_19160	4239526	4239609	-1	anthranilate/aminodeoxychorismate synthase component II
GI29	gypsy:4450160-4450783			4448996	4456694	7698		C1O30_00005	1	4740052	1	hypothetical protein
				4448996	4456694	7698		C1O30_20070	4449252	4449647	-1	hypothetical protein
				4448996	4456694	7698		C1O30_20075	4450094	4451214	-1	IS3 family transposase
				4448996	4456694	7698		C1O30_20080	4451603	4452052	-1	hypothetical protein
				4448996	4456694	7698		C1O30_20085	4452328	4452615	-1	hypothetical protein
				4448996	4456694	7698		C1O30_20090	4452785	4453165	-1	hypothetical protein
				4448996	4456694	7698		C1O30_20095	4453363	4453563	-1	hypothetical protein
				4448996	4456694	7698		C1O30_20100	4453795	4454121	-1	zinc ABC transporter substrate-binding protein
				4448996	4456694	7698		C1O30_20105	4454316	4454663	-1	hypothetical protein
				4448996	4456694	7698		C1O30_20110	4455068	4455553	-1	hypothetical protein
				4448996	4456694	7698		C1O30_20115	4455757	4456152	-1	hypothetical protein
				4448996	4456694	7698		C1O30_20120	4456155	4456730	-1	hypothetical protein
GI30				4449252	4460728	11476		C1O30_00005	1	4740052	1	hypothetical protein
				4449252	4460728	11476		C1O30_20070	4449252	4449647	-1	hypothetical protein
				4449252	4460728	11476		C1O30_20075	4450094	4451214	-1	IS3 family transposase
				4449252	4460728	11476		C1O30_20080	4451603	4452052	-1	hypothetical protein
				4449252	4460728	11476		C1O30_20085	4452328	4452615	-1	hypothetical protein
				4449252	4460728	11476		C1O30_20090	4452785	4453165	-1	hypothetical protein
				4449252	4460728	11476		C1O30_20095	4453363	4453563	-1	hypothetical protein
				4449252	4460728	11476		C1O30_20100	4453795	4454121	-1	zinc ABC transporter substrate-binding protein
				4449252	4460728	11476		C1O30_20105	4454316	4454663	-1	hypothetical protein
				4449252	4460728	11476		C1O30_20110	4455068	4455553	-1	hypothetical protein
				4449252	4460728	11476		C1O30_20115	4455757	4456152	-1	hypothetical protein
				4449252	4460728	11476		C1O30_20120	4456155	4456730	-1	hypothetical protein
				4449252	4460728	11476		C1O30_20125	4456890	4458797	-1	hemolysin BL-binding protein
				4449252	4460728	11476		C1O30_20130	4458855	4459187	1	transcriptional regulator
				4449252	4460728	11476		C1O30_20135	4459195	4459452	-1	transcriptional regulator
				4449252	4460728	11476		C1O30_20140	4459551	4459871	1	transcriptional regulator
				4449252	4460728	11476		C1O30_20145	4460231	4460728	-1	hypothetical protein
				4449252	4460728	11476		C1O30_20150	4460725	4469553	-1	filamentous hemagglutinin
GI31				4477758	4486955	9197		C1O30_00005	1	4740052	1	hypothetical protein
				4477758	4486955	9197		C1O30_20200	4477758	4478888	-1	phage tail protein
				4477758	4486955	9197		C1O30_20205	4479182	4479802	-1	phage tail protein
				4477758	4486955	9197		C1O30_20210	4479802	4480731	-1	phage tail protein
				4477758	4486955	9197		C1O30_20215	4481241	4482146	-1	phage tail protein
				4477758	4486955	9197		C1O30_20220	4482398	4482778	-1	phage tail protein
				4477758	4486955	9197		C1O30_20225	4482787	4484046	-1	phage tail protein
				4477758	4486955	9197		C1O30_20230	4484378	4484800	-1	hypothetical protein
				4477758	4486955	9197		C1O30_20235	4484803	4486110	-1	phage tail protein
				4477758	4486955	9197		C1O30_20240	4486467	4486955	1	hypothetical protein
GI32	gypsy:4690316-4690807;4693091-4693714			4689101	4693780	4679		C1O30_00005	1	4740052	1	hypothetical protein
				4689101	4693780	4679		C1O30_21120	4689101	4689805	1	heteromeric transposase endonuclease subunit TnsA
				4689101	4693780	4679		C1O30_21125	4689711	4689905	-1	hypothetical protein
				4689101	4693780	4679		C1O30_21130	4689879	4690990	1	IS3 family transposase
				4689101	4693780	4679		C1O30_21135	4691223	4692626	1	hypothetical protein
				4689101	4693780	4679		C1O30_21140	4692660	4693780	1	IS3 family transposase

## Sheet: MS_2014
Supplementary Table 4. Genomic features, constituent genes and gene annotations of predicated GIs within MS_2014.
GI NO.	Transposon	Repeats	Prophage	Island start	Island end	Length	Symbol	Locus	Gene start	Gene end	Strand	Product
GI1	gypsy:463180-463863	462696-462733; 463873-463993		452925	472944	20019		HJ580_02045	452925	453374	-1	DNA polymerase III subunit chi
				452925	472944	20019	pepA	HJ580_02050	453489	454997	-1	leucyl aminopeptidase
				452925	472944	20019	lptF	HJ580_02055	455280	456398	1	LPS export ABC transporter permease LptF
				452925	472944	20019	lptG	HJ580_02060	456400	457470	1	LPS export ABC transporter permease LptG
				452925	472944	20019		HJ580_02070	457997	459267	1	integrase arm-type DNA-binding domain-containing protein
				452925	472944	20019		HJ580_02075	459385	462498	1	hypothetical protein
				452925	472944	20019		HJ580_02080	462794	463893	1	IS3 family transposase
				452925	472944	20019		HJ580_02085	464397	465209	1	hypothetical protein
				452925	472944	20019		HJ580_02090	466035	467474	1	GGDEF domain-containing protein
				452925	472944	20019		HJ580_02095	467595	468320	-1	methyltransferase domain-containing protein
				452925	472944	20019		HJ580_02100	468734	469588	1	pirin family protein
				452925	472944	20019		HJ580_02105	469785	470123	-1	hypothetical protein
				452925	472944	20019		HJ580_02110	470731	471357	1	hypothetical protein
				452925	472944	20019		HJ580_02115	471504	471917	-1	hypothetical protein
				452925	472944	20019		HJ580_02120	472138	472944	1	hypothetical protein
GI2				473770	480527	6757		HJ580_02130	473770	474114	1	Dabb family protein
				473770	480527	6757		HJ580_02135	474425	475282	1	hypothetical protein
				473770	480527	6757		HJ580_02140	475337	475915	1	bacilysin biosynthesis protein BacA
				473770	480527	6757		HJ580_02145	475936	476127	1	hypothetical protein
				473770	480527	6757		HJ580_02150	476251	476868	-1	amino acid transporter
				473770	480527	6757	vsr	HJ580_02155	477056	477538	-1	DNA mismatch endonuclease Vsr
				473770	480527	6757		HJ580_02160	477545	478975	-1	DNA cytosine methyltransferase
				473770	480527	6757		HJ580_02165	479214	480527	1	hypothetical protein
GI3				580064	584098	4034		HJ580_02615	580064	580357	1	DUF1778 domain-containing protein
				580064	584098	4034		HJ580_02620	580354	580842	1	GNAT family N-acetyltransferase
				580064	584098	4034		HJ580_02625	581000	583201	1	AAA family ATPase
				580064	584098	4034	ccdB	HJ580_02630	583572	583877	-1	type II toxin-antitoxin system toxin CcdB
				580064	584098	4034	ccdA	HJ580_02635	583880	584098	-1	type II toxin-antitoxin system antitoxin CcdA
GI4				712797	720800	8003	lpcA	HJ580_03260	712797	713378	1	D-sedoheptulose 7-phosphate isomerase
				712797	720800	8003		HJ580_03265	713545	714933	1	mannose-1-phosphate guanylyltransferase/mannose-6-phosphate isomerase
				712797	720800	8003		HJ580_03270	715399	716178	1	ABC transporter permease
				712797	720800	8003		HJ580_03275	716181	716915	1	ABC transporter ATP-binding protein
				712797	720800	8003		HJ580_03280	716915	718234	1	hypothetical protein
				712797	720800	8003		HJ580_03285	718283	719422	1	glycosyltransferase family 4 protein
				712797	720800	8003		HJ580_03290	719430	720539	1	glycosyltransferase
				712797	720800	8003		HJ580_03295	720693	720800	1	transposase
GI5	mariner_ant1:831314-832117	792489-792517; 877941-877971	P1:HJ580_03990-HJ580_04045	779280	881068	101788		HJ580_03540	779280	780062	-1	transporter substrate-binding domain-containing protein
				779280	881068	101788		HJ580_03545	780972	781442	-1	MEKHLA domain-containing protein
				779280	881068	101788		HJ580_03550	782065	782298	-1	hypothetical protein
				779280	881068	101788		HJ580_03555	782298	782705	-1	hypothetical protein
				779280	881068	101788		HJ580_03560	782863	783612	-1	tyrosine-type recombinase/integrase
				779280	881068	101788		HJ580_03565	784450	784704	-1	transcriptional regulator
				779280	881068	101788		HJ580_03570	785316	785834	1	Hcp family type VI secretion system effector
				779280	881068	101788		HJ580_03575	785947	787809	1	type VI secretion system tip protein VgrG
				779280	881068	101788		HJ580_03580	787887	788327	1	DUF1795 domain-containing protein
				779280	881068	101788		HJ580_03585	788345	792177	1	type IV secretion protein Rhs
				779280	881068	101788		HJ580_03590	792537	793382	1	toxin
				779280	881068	101788		HJ580_03595	794011	794306	1	RHS repeat-associated core domain-containing protein
				779280	881068	101788		HJ580_03600	794701	795090	1	immunity 22 family protein
				779280	881068	101788		HJ580_03605	795668	797176	1	sigma-54-dependent Fis family transcriptional regulator
				779280	881068	101788		HJ580_03610	797262	799061	-1	DNA-binding domain-containing protein
				779280	881068	101788		HJ580_03615	799375	799761	1	hypothetical protein
				779280	881068	101788		HJ580_03620	799795	799980	-1	IS3 family transposase
				779280	881068	101788		HJ580_03625	800209	801270	-1	hypothetical protein
				779280	881068	101788		HJ580_03630	801463	801918	-1	hypothetical protein
				779280	881068	101788		HJ580_03635	802040	802588	-1	3'-5' exonuclease
				779280	881068	101788		HJ580_03640	802682	803578	-1	AAA family ATPase
				779280	881068	101788		HJ580_03645	803578	804066	-1	hypothetical protein
				779280	881068	101788		HJ580_03650	804063	805007	-1	nucleotidyltransferase
				779280	881068	101788		HJ580_03655	805159	806058	1	WYL domain-containing protein
				779280	881068	101788		HJ580_03660	806088	807605	1	purine phosphorylase
				779280	881068	101788		HJ580_03665	807695	808135	1	hypothetical protein
				779280	881068	101788		HJ580_03670	808259	808618	1	DUF3742 family protein
				779280	881068	101788		HJ580_03675	808625	810148	-1	conjugal transfer protein TraG
				779280	881068	101788		HJ580_03680	810160	810510	-1	hypothetical protein
				779280	881068	101788		HJ580_03685	810507	811904	-1	integrating conjugative element protein
				779280	881068	101788		HJ580_03690	811915	812841	-1	TIGR03756 family integrating conjugative element protein
				779280	881068	101788		HJ580_03695	812841	813296	-1	TIGR03757 family integrating conjugative element protein
				779280	881068	101788		HJ580_03700	813448	814059	1	hypothetical protein
				779280	881068	101788		HJ580_03705	814052	814345	1	nucleotidyl transferase AbiEii/AbiGii toxin family protein
				779280	881068	101788		HJ580_03710	814345	814533	-1	transposase
				779280	881068	101788		HJ580_03715	814969	815889	1	hypothetical protein
				779280	881068	101788		HJ580_03720	815906	817069	1	hypothetical protein
				779280	881068	101788		HJ580_03725	817086	818051	1	hypothetical protein
				779280	881068	101788		HJ580_03730	818048	818950	1	tetrahydrodipicolinate succinyltransferase
				779280	881068	101788		HJ580_03735	818925	819692	1	SDR family oxidoreductase
				779280	881068	101788		HJ580_03740	819689	820957	1	ATP-grasp domain-containing protein
				779280	881068	101788		HJ580_03745	821012	822172	1	MFS transporter
				779280	881068	101788		HJ580_03750	822165	822755	1	LysE family transporter
				779280	881068	101788		HJ580_03755	823096	825942	-1	conjugative transfer ATPase
				779280	881068	101788		HJ580_03760	825942	826379	-1	TIGR03751 family conjugal transfer lipoprotein
				779280	881068	101788		HJ580_03765	826360	827760	-1	TIGR03752 family integrating conjugative element protein
				779280	881068	101788		HJ580_03770	827750	828643	-1	TIGR03749 family integrating conjugative element protein
				779280	881068	101788		HJ580_03775	828640	829320	-1	TIGR03746 family integrating conjugative element protein
				779280	881068	101788		HJ580_03780	829317	829715	-1	TIGR03750 family conjugal transfer protein
				779280	881068	101788		HJ580_03785	829728	830087	-1	TIGR03745 family integrating conjugative element membrane protein
				779280	881068	101788		HJ580_03790	830106	830339	-1	TIGR03758 family integrating conjugative element protein
				779280	881068	101788		HJ580_03795	830336	830722	-1	hypothetical protein
				779280	881068	101788		HJ580_03800	831212	832243	-1	IS630 family transposase
				779280	881068	101788		HJ580_03805	832418	833242	1	DUF2971 domain-containing protein
				779280	881068	101788		HJ580_03810	833357	834106	-1	TIGR03747 family integrating conjugative element membrane protein
				779280	881068	101788	traD	HJ580_03815	834103	836262	-1	type IV conjugative transfer system coupling protein TraD
				779280	881068	101788		HJ580_03820	836267	836806	-1	integrating conjugative element protein
				779280	881068	101788		HJ580_03825	836803	837393	-1	transglycosylase SLT domain-containing protein
				779280	881068	101788		HJ580_03830	837375	838082	-1	TIGR03759 family integrating conjugative element protein
				779280	881068	101788		HJ580_03835	838094	838744	-1	hypothetical protein
				779280	881068	101788		HJ580_03840	838741	839310	-1	integrating conjugative element protein pill, pfgi-1
				779280	881068	101788		HJ580_03845	839862	840995	1	HNH endonuclease
				779280	881068	101788		HJ580_03850	841152	842153	-1	hypothetical protein
				779280	881068	101788		HJ580_03855	842519	843319	1	hypothetical protein
				779280	881068	101788		HJ580_03860	844312	846591	-1	DEAD/DEAH box helicase
				779280	881068	101788		HJ580_03865	846727	847836	-1	class I SAM-dependent methyltransferase
				779280	881068	101788		HJ580_03870	847906	848550	-1	hypothetical protein
				779280	881068	101788		HJ580_03875	848669	849013	-1	hypothetical protein
				779280	881068	101788		HJ580_03880	849104	849766	-1	DUF3275 family protein
				779280	881068	101788		HJ580_03885	849849	851315	-1	DUF3577 domain-containing protein
				779280	881068	101788		HJ580_03890	852006	852605	1	TIR domain-containing protein
				779280	881068	101788		HJ580_03895	852748	854364	1	patatin-like phospholipase family protein
				779280	881068	101788		HJ580_03900	854430	855275	1	toll/interleukin-1 receptor domain-containing protein
				779280	881068	101788		HJ580_03905	855300	856442	1	toll/interleukin-1 receptor domain-containing protein
				779280	881068	101788		HJ580_03910	856446	857033	1	hypothetical protein
				779280	881068	101788		HJ580_03915	857293	857871	1	TIR domain-containing protein
				779280	881068	101788		HJ580_03920	858150	858224	1	H-NS histone family protein
				779280	881068	101788		HJ580_03925	858438	858803	-1	DUF3085 domain-containing protein
				779280	881068	101788		HJ580_03930	858952	859749	-1	GTPase
				779280	881068	101788		HJ580_03935	860135	861607	-1	DNA cytosine methyltransferase
				779280	881068	101788		HJ580_03940	862132	864144	-1	DNA topoisomerase III
				779280	881068	101788		HJ580_03945	864272	864379	-1	single-stranded DNA-binding protein
				779280	881068	101788		HJ580_03950	864470	865000	-1	DUF3158 family protein
				779280	881068	101788		HJ580_03955	864997	865815	-1	TIGR03761 family integrating conjugative element protein
				779280	881068	101788		HJ580_03960	865999	867213	-1	hypothetical protein
				779280	881068	101788		HJ580_03965	867213	867773	-1	DUF2857 domain-containing protein
				779280	881068	101788		HJ580_03970	867785	869509	-1	ParB N-terminal domain-containing protein
				779280	881068	101788		HJ580_03975	869517	869762	-1	type II toxin-antitoxin system HicA family toxin
				779280	881068	101788		HJ580_03980	869746	870575	-1	ParA family protein
				779280	881068	101788		HJ580_03985	870609	870821	-1	AlpA family phage regulatory protein
				779280	881068	101788		HJ580_03990	871530	872297	-1	hypothetical protein
				779280	881068	101788		HJ580_03995	872486	873361	-1	transposase
				779280	881068	101788		HJ580_04000	873562	874710	1	IS3 family transposase
				779280	881068	101788		HJ580_04005	874750	875979	-1	integrase arm-type DNA-binding domain-containing protein
				779280	881068	101788	smpB	HJ580_04015	876559	877041	-1	SsrA-binding protein SmpB
				779280	881068	101788		HJ580_04020	877197	877631	1	type II toxin-antitoxin system RatA family toxin
				779280	881068	101788		HJ580_04025	877624	877917	1	RnfH family protein
				779280	881068	101788	bamE	HJ580_04030	877989	878333	-1	outer membrane protein assembly factor BamE
				779280	881068	101788	recN	HJ580_04035	878445	880106	-1	DNA repair protein RecN
				779280	881068	101788	nadK	HJ580_04040	880190	881068	-1	NAD(+) kinase
GI6	gypsy: 996305-996721			992627	997469	4842		HJ580_04525	992627	993154	-1	AAA family ATPase
				992627	997469	4842		HJ580_04530	993385	994491	-1	ABC transporter substrate-binding protein
				992627	997469	4842		HJ580_04535	994980	995696	-1	ATP-binding protein
				992627	997469	4842		HJ580_04540	995766	996886	1	IS3 family transposase
				992627	997469	4842		HJ580_04545	996960	997469	1	hypothetical protein
GI7				1000631	1005242	4611		HJ580_04575	1000631	1000933	1	XRE family transcriptional regulator
				1000631	1005242	4611		HJ580_04580	1000930	1003017	1	hypothetical protein
				1000631	1005242	4611		HJ580_04585	1003010	1003411	1	DNA cytosine methyltransferase
				1000631	1005242	4611		HJ580_04590	1003416	1003601	1	hypothetical protein
				1000631	1005242	4611		HJ580_04595	1003580	1004098	1	hypothetical protein
				1000631	1005242	4611		HJ580_04600	1004211	1005242	-1	DUF4238 domain-containing protein
GI8				1087324	1095478	8154	mutS	HJ580_04980	1084791	1087349	-1	DNA mismatch repair protein MutS
				1087324	1095478	8154		HJ580_04985	1088026	1088796	1	thioesterase
				1087324	1095478	8154		HJ580_04990	1088828	1089694	1	isocitrate lyase/phosphoenolpyruvate mutase family protein
				1087324	1095478	8154		HJ580_04995	1089694	1090617	1	3-oxoacyl-ACP synthase
				1087324	1095478	8154		HJ580_05000	1090614	1092800	1	iron-containing redox enzyme family protein
				1087324	1095478	8154		HJ580_05005	1092879	1094072	1	acyl-CoA dehydrogenase
				1087324	1095478	8154		HJ580_05010	1094069	1095208	1	cytochrome P450
				1087324	1095478	8154		HJ580_05015	1095228	1096550	1	ATP-grasp domain-containing protein
GI9				1096252	1105864	9612		HJ580_05015	1095228	1096550	1	ATP-grasp domain-containing protein
				1096252	1105864	9612		HJ580_05020	1096543	1097802	1	MFS transporter
				1096252	1105864	9612		HJ580_05025	1097834	1099201	1	SidA/IucD/PvdA family monooxygenase
				1096252	1105864	9612		HJ580_05030	1099232	1100287	1	FAD-binding oxidoreductase
				1096252	1105864	9612		HJ580_05035	1100290	1102521	1	class I tRNA ligase family protein
				1096252	1105864	9612		HJ580_05040	1102518	1105772	1	non-ribosomal peptide synthetase
				1096252	1105864	9612		HJ580_05045	1105769	1107283	1	AMP-binding protein
GI10		1126715-1126745		1116184	1127432	11248		HJ580_05100	1116184	1116972	-1	aspartyl/asparaginyl beta-hydroxylase domain-containing protein
				1116184	1127432	11248		HJ580_05105	1116978	1117547	-1	GNAT family N-acetyltransferase
				1116184	1127432	11248		HJ580_05110	1117569	1118906	-1	MFS transporter
				1116184	1127432	11248		HJ580_05115	1118909	1119577	-1	hypothetical protein
				1116184	1127432	11248		HJ580_05120	1119581	1120732	-1	YcaO-like family protein
				1116184	1127432	11248		HJ580_05125	1120729	1123746	-1	hypothetical protein
				1116184	1127432	11248		HJ580_05130	1123785	1124618	-1	DUF692 family protein
				1116184	1127432	11248		HJ580_05135	1124615	1125199	-1	hypothetical protein
				1116184	1127432	11248		HJ580_05140	1125202	1125462	-1	MoaD/ThiS family protein
				1116184	1127432	11248	moeB	HJ580_05145	1125478	1126563	-1	molybdopterin-synthase adenylyltransferase MoeB
				1116184	1127432	11248		HJ580_05150	1127283	1127432	1	hypothetical protein
GI11				1479032	1483473	4441		HJ580_06720	1479032	1480402	1	phospholipase
				1479032	1483473	4441		HJ580_06725	1480402	1481181	1	ankyrin repeat domain-containing protein
				1479032	1483473	4441		HJ580_06730	1481178	1481945	1	ankyrin repeat domain-containing protein
				1479032	1483473	4441		HJ580_06735	1481942	1482709	1	ankyrin repeat domain-containing protein
				1479032	1483473	4441		HJ580_06740	1482706	1483473	1	ankyrin repeat domain-containing protein
GI12				1639632	1643817	4185		HJ580_07305	1639316	1639663	-1	HNH nuclease family protein
				1639632	1643817	4185		HJ580_07310	1639782	1640726	-1	DMT family transporter
				1639632	1643817	4185		HJ580_07315	1640848	1641303	1	Lrp/AsnC family transcriptional regulator
				1639632	1643817	4185		HJ580_07320	1641533	1641625	-1	NAD(P)-binding domain-containing protein
				1639632	1643817	4185		HJ580_07325	1641783	1642739	-1	nitronate monooxygenase
				1639632	1643817	4185		HJ580_07330	1642842	1643711	1	LysR family transcriptional regulator
GI13				1664286	1669350	5064		HJ580_07420	1664286	1664600	1	CcdB family protein
				1664286	1669350	5064		HJ580_07425	1664994	1665797	-1	4-carboxymuconolactone decarboxylase
				1664286	1669350	5064		HJ580_07430	1665813	1666508	-1	antibiotic biosynthesis monooxygenase
				1664286	1669350	5064		HJ580_07435	1666568	1667587	-1	aldo/keto reductase
				1664286	1669350	5064		HJ580_07440	1667606	1668163	-1	NAD(P)H-dependent oxidoreductase
				1664286	1669350	5064		HJ580_07445	1668316	1669350	-1	amidohydrolase
GI14			P2: HJ580_07495-HJ580_07585	1673320	1680706	7386		HJ580_07475	1673320	1673610	-1	VirB3 family type IV secretion system protein
				1673320	1680706	7386		HJ580_07480	1673621	1673896	-1	TrbC/VirB2 family protein
				1673320	1680706	7386		HJ580_07485	1673916	1674563	-1	lytic transglycosylase domain-containing protein
				1673320	1680706	7386		HJ580_07490	1674633	1674869	-1	hypothetical protein
				1673320	1680706	7386		HJ580_07495	1675474	1676361	-1	HNH endonuclease
				1673320	1680706	7386		HJ580_07500	1676358	1677842	-1	AAA family ATPase
				1673320	1680706	7386		HJ580_07505	1678190	1678399	-1	TraR/DksA family transcriptional regulator
				1673320	1680706	7386		HJ580_07510	1678389	1678973	-1	DUF2857 domain-containing protein
				1673320	1680706	7386		HJ580_07515	1678991	1679185	-1	AlpA family transcriptional regulator
				1673320	1680706	7386		HJ580_07520	1679494	1679664	1	hypothetical protein
				1673320	1680706	7386		HJ580_07525	1679680	1679937	-1	helix-turn-helix transcriptional regulator
				1673320	1680706	7386		HJ580_07530	1680051	1680329	-1	helix-turn-helix transcriptional regulator
				1673320	1680706	7386		HJ580_07535	1680437	1680706	1	transcriptional regulator
GI15				1682044	1693383	11339	tssI	HJ580_07545	1682044	1683897	1	type VI secretion system tip protein VgrG
				1682044	1693383	11339		HJ580_07550	1683911	1684318	1	DUF1795 domain-containing protein
				1682044	1693383	11339		HJ580_07555	1684330	1688289	1	type IV secretion protein Rhs
				1682044	1693383	11339		HJ580_07560	1688705	1689184	1	hypothetical protein
				1682044	1693383	11339		HJ580_07565	1689292	1690429	1	type IV secretion protein Rhs
				1682044	1693383	11339		HJ580_07570	1690426	1690983	1	hypothetical protein
				1682044	1693383	11339		HJ580_07575	1691267	1692193	-1	hypothetical protein
				1682044	1693383	11339		HJ580_07580	1693222	1693383	1	DUF736 domain-containing protein
GI16		1870833-1870916		1863762	1906891	43129		HJ580_08350	1863762	1864148	1	hypothetical protein
				1863762	1906891	43129		HJ580_08355	1864132	1864335	1	hypothetical protein
				1863762	1906891	43129		HJ580_08360	1864734	1865609	1	hypothetical protein
				1863762	1906891	43129		HJ580_08365	1865801	1866019	1	AlpA family transcriptional regulator
				1863762	1906891	43129		HJ580_08370	1866040	1866372	1	hypothetical protein
				1863762	1906891	43129		HJ580_08375	1866447	1866737	1	hypothetical protein
				1863762	1906891	43129		HJ580_08380	1866795	1867160	1	hypothetical protein
				1863762	1906891	43129		HJ580_08385	1867224	1867478	1	DNA-binding protein
				1863762	1906891	43129		HJ580_08390	1867586	1868098	1	GrpB family protein
				1863762	1906891	43129		HJ580_08395	1868483	1868962	-1	DUF4756 family protein
				1863762	1906891	43129		HJ580_08400	1869146	1869946	-1	hypothetical protein
				1863762	1906891	43129		HJ580_08405	1869974	1870708	-1	DNA-binding protein
				1863762	1906891	43129		HJ580_08410	1871618	1871887	1	hypothetical protein
				1863762	1906891	43129		HJ580_08415	1871993	1872313	1	hypothetical protein
				1863762	1906891	43129		HJ580_08420	1872385	1872585	1	hypothetical protein
				1863762	1906891	43129		HJ580_08425	1872551	1873015	1	hypothetical protein
				1863762	1906891	43129		HJ580_08430	1873108	1873893	1	HNH endonuclease
				1863762	1906891	43129		HJ580_08435	1874290	1874658	1	NUDIX domain-containing protein
				1863762	1906891	43129		HJ580_08440	1875216	1875470	-1	plasmid replication protein
				1863762	1906891	43129		HJ580_08445	1875467	1876336	-1	replication protein
				1863762	1906891	43129		HJ580_08450	1876972	1877466	1	hypothetical protein
				1863762	1906891	43129		HJ580_08455	1877523	1880186	1	DotA/TraY family protein
				1863762	1906891	43129		HJ580_08460	1880539	1881039	-1	hypothetical protein
				1863762	1906891	43129		HJ580_08465	1881220	1881573	1	hypothetical protein
				1863762	1906891	43129		HJ580_08470	1881570	1882697	1	hypothetical protein
				1863762	1906891	43129		HJ580_08475	1882871	1884121	1	hypothetical protein
				1863762	1906891	43129		HJ580_08480	1884407	1884568	-1	DNA-binding protein
				1863762	1906891	43129		HJ580_08485	1884830	1885306	-1	hypothetical protein
				1863762	1906891	43129		HJ580_08490	1885516	1885833	-1	hypothetical protein
				1863762	1906891	43129		HJ580_08495	1886214	1886768	1	lipoprotein
				1863762	1906891	43129		HJ580_08500	1886786	1887442	1	hypothetical protein
				1863762	1906891	43129		HJ580_08505	1887513	1889378	-1	hypothetical protein
				1863762	1906891	43129		HJ580_08510	1890005	1890721	1	hypothetical protein
				1863762	1906891	43129		HJ580_08515	1890887	1892197	-1	MobA/MobL family protein
				1863762	1906891	43129		HJ580_08520	1893525	1894604	1	hypothetical protein
				1863762	1906891	43129		HJ580_08525	1894634	1895017	1	hypothetical protein
				1863762	1906891	43129		HJ580_08530	1895008	1895640	1	hypothetical protein
				1863762	1906891	43129		HJ580_08535	1896165	1896422	1	hypothetical protein
				1863762	1906891	43129		HJ580_08540	1896419	1896703	1	conjugal transfer protein TraD
				1863762	1906891	43129		HJ580_08545	1896874	1897188	1	hypothetical protein
				1863762	1906891	43129		HJ580_08550	1897183	1897731	-1	hypothetical protein
				1863762	1906891	43129		HJ580_08555	1897813	1898214	-1	H-NS histone family protein
				1863762	1906891	43129		HJ580_08560	1898398	1899888	1	shufflon system plasmid conjugative transfer pilus tip adhesin PilV
				1863762	1906891	43129		HJ580_08565	1899967	1900143	-1	hypothetical protein
				1863762	1906891	43129		HJ580_08570	1900604	1900858	1	hypothetical protein
				1863762	1906891	43129		HJ580_08575	1900853	1901467	-1	hypothetical protein
				1863762	1906891	43129		HJ580_08580	1901936	1902592	-1	NAD(P)H-binding protein
				1863762	1906891	43129		HJ580_08585	1902872	1904254	1	DHA2 family efflux MFS transporter permease subunit
				1863762	1906891	43129		HJ580_08590	1904449	1905735	-1	integrase arm-type DNA-binding domain-containing protein
				1863762	1906891	43129	mtfA	HJ580_08600	1906115	1906891	-1	DgsA anti-repressor MtfA
GI17				2150040	2154883	4843		HJ580_09680	2150040	2150924	1	fumarylacetoacetate hydrolase family protein
				2150040	2154883	4843	citC	HJ580_09685	2151000	2152049	1	[citrate (pro-3S)-lyase] ligase
				2150040	2154883	4843	citD	HJ580_09690	2152084	2152374	1	citrate lyase acyl carrier protein
				2150040	2154883	4843	citE	HJ580_09695	2152374	2153264	1	citrate (pro-3S)-lyase subunit beta
				2150040	2154883	4843	citF	HJ580_09700	2153354	2154883	1	citrate lyase subunit alpha
				2150040	2154883	4843	citX	HJ580_09705	2154880	2155422	1	citrate lyase holo-[acyl-carrier protein] synthase
GI18				2354888	2359029	4141		HJ580_10650	2354888	2355232	-1	MmcQ protein
				2354888	2359029	4141		HJ580_10655	2355336	2356340	-1	acyltransferase family protein
				2354888	2359029	4141	tehA	HJ580_10660	2357071	2358039	1	dicarboxylate transporter/tellurite-resistance protein TehA
				2354888	2359029	4141		HJ580_10665	2358334	2359029	1	Expansin-YoaJ
GI19		2559472-2559497		2554993	2559904	4911		HJ580_11490	2554635	2557226	-1	hypothetical protein
				2554993	2559904	4911		HJ580_11495	2557230	2559794	-1	hypothetical protein
GI20				2939650	2953793	14143		HJ580_13140	2939650	2941059	-1	hypothetical protein
				2939650	2953793	14143		HJ580_13145	2941182	2942378	-1	hypothetical protein
				2939650	2953793	14143		HJ580_13150	2942362	2943447	-1	acyl-protein synthetase
				2939650	2953793	14143		HJ580_13155	2943437	2944843	-1	AMP-binding protein
				2939650	2953793	14143		HJ580_13160	2944846	2945814	-1	transketolase
				2939650	2953793	14143		HJ580_13165	2945814	2946623	-1	transketolase
				2939650	2953793	14143		HJ580_13170	2946620	2947363	-1	SDR family oxidoreductase
				2939650	2953793	14143		HJ580_13175	2947379	2948122	-1	SDR family oxidoreductase
				2939650	2953793	14143		HJ580_13180	2948132	2948368	-1	acyl carrier protein
				2939650	2953793	14143		HJ580_13185	2948458	2949114	-1	NeuD/PglB/VioB family sugar acetyltransferase
				2939650	2953793	14143		HJ580_13190	2949126	2950247	-1	DegT/DnrJ/EryC1/StrS family aminotransferase
				2939650	2953793	14143		HJ580_13195	2950362	2953793	-1	methyltransferase
GI21				3003720	3008207	4487		HJ580_13455	3003720	3005006	1	cellulase family glycosylhydrolase
				3003720	3008207	4487		HJ580_13460	3005080	3006357	-1	pectate lyase
				3003720	3008207	4487		HJ580_13465	3006978	3007289	1	holin
				3003720	3008207	4487		HJ580_13470	3007279	3007770	1	glycoside hydrolase family 104 protein
				3003720	3008207	4487		HJ580_13475	3007767	3008207	1	LysB family phage lysis regulatory protein
GI22	gypsy:3335602-3336231			3319913	3340521	20608		HJ580_14810	3319913	3320692	1	TIM barrel protein
				3319913	3340521	20608		HJ580_14815	3320907	3322154	1	MFS transporter
				3319913	3340521	20608		HJ580_14820	3322176	3323246	1	sugar phosphate isomerase/epimerase
				3319913	3340521	20608		HJ580_14825	3323243	3324397	1	Gfo/Idh/MocA family oxidoreductase
				3319913	3340521	20608		HJ580_14830	3324500	3325480	1	LacI family transcriptional regulator
				3319913	3340521	20608		HJ580_14835	3325690	3326544	-1	sugar phosphate isomerase/epimerase
				3319913	3340521	20608	thiD	HJ580_14840	3326971	3327774	-1	bifunctional hydroxymethylpyrimidine kinase/phosphomethylpyrimidine kinase
				3319913	3340521	20608	thiM	HJ580_14845	3327771	3328565	-1	hydroxyethylthiazole kinase
				3319913	3340521	20608		HJ580_14850	3329572	3330780	1	IS256 family transposase
				3319913	3340521	20608		HJ580_14855	3330824	3331951	-1	N-6 DNA methylase
				3319913	3340521	20608		HJ580_14860	3332030	3333724	1	zinc ribbon domain-containing protein
				3319913	3340521	20608		HJ580_14865	3333733	3334581	1	hypothetical protein
				3319913	3340521	20608		HJ580_14870	3334907	3335512	-1	tyrosine-type recombinase/integrase
				3319913	3340521	20608		HJ580_14875	3335542	3336662	-1	IS3 family transposase
				3319913	3340521	20608		HJ580_14880	3336735	3337433	-1	integrase
				3319913	3340521	20608		HJ580_14885	3337843	3338739	-1	LysR family transcriptional regulator
				3319913	3340521	20608		HJ580_14890	3338853	3339158	1	carboxymuconolactone decarboxylase family protein
				3319913	3340521	20608		HJ580_14895	3339162	3339548	1	tautomerase family protein
				3319913	3340521	20608		HJ580_14900	3339548	3340075	1	DUF4865 family protein
				3319913	3340521	20608		HJ580_14905	3340129	3340521	-1	VOC family protein
GI23				3353965	3358495	4530		HJ580_14975	3353965	3355092	-1	acyltransferase
				3353965	3358495	4530		HJ580_14980	3355691	3356077	1	acyl-CoA thioesterase
				3353965	3358495	4530		HJ580_14985	3356352	3356729	-1	antibiotic biosynthesis monooxygenase
				3353965	3358495	4530		HJ580_14990	3356828	3357721	-1	NAD(P)/FAD-dependent oxidoreductase
				3353965	3358495	4530		HJ580_14995	3357848	3358495	1	helix-turn-helix transcriptional regulator
GI24				3572984	3593584	20600	radC	HJ580_16020	3572830	3573303	-1	DNA repair protein RadC
				3572984	3593584	20600		HJ580_16025	3573334	3574155	-1	DUF945 domain-containing protein
				3572984	3593584	20600		HJ580_16030	3574252	3575118	-1	GTPase family protein
				3572984	3593584	20600		HJ580_16035	3575855	3576346	1	hypothetical protein
				3572984	3593584	20600		HJ580_16040	3576350	3577516	1	hypothetical protein
				3572984	3593584	20600		HJ580_16045	3577509	3579377	1	hypothetical protein
				3572984	3593584	20600		HJ580_16050	3579484	3579873	1	hypothetical protein
				3572984	3593584	20600		HJ580_16055	3580102	3580704	1	DUF1819 family protein
				3572984	3593584	20600		HJ580_16060	3580701	3581303	1	DUF1788 domain-containing protein
				3572984	3593584	20600	brxC	HJ580_16065	3581315	3584956	1	BREX system P-loop protein BrxC
				3572984	3593584	20600	pglX	HJ580_16070	3585002	3588697	1	BREX-1 system adenine-specific DNA-methyltransferase PglX
				3572984	3593584	20600	pglZ	HJ580_16075	3588895	3591492	1	BREX-1 system phosphatase PglZ type A
				3572984	3593584	20600	brxL	HJ580_16080	3591503	3593587	1	protease Lon-related BREX system protein BrxL
GI24				3573334	3598976	25642		HJ580_16025	3573334	3574155	-1	DUF945 domain-containing protein
				3573334	3598976	25642		HJ580_16030	3574252	3575118	-1	GTPase family protein
				3573334	3598976	25642		HJ580_16035	3575855	3576346	1	hypothetical protein
				3573334	3598976	25642		HJ580_16040	3576350	3577516	1	hypothetical protein
				3573334	3598976	25642		HJ580_16045	3577509	3579377	1	hypothetical protein
				3573334	3598976	25642		HJ580_16050	3579484	3579873	1	hypothetical protein
				3573334	3598976	25642		HJ580_16055	3580102	3580704	1	DUF1819 family protein
				3573334	3598976	25642		HJ580_16060	3580701	3581303	1	DUF1788 domain-containing protein
				3573334	3598976	25642	brxC	HJ580_16065	3581315	3584956	1	BREX system P-loop protein BrxC
				3573334	3598976	25642	pglX	HJ580_16070	3585002	3588697	1	BREX-1 system adenine-specific DNA-methyltransferase PglX
				3573334	3598976	25642	pglZ	HJ580_16075	3588895	3591492	1	BREX-1 system phosphatase PglZ type A
				3573334	3598976	25642	brxL	HJ580_16080	3591503	3593587	1	protease Lon-related BREX system protein BrxL
				3573334	3598976	25642		HJ580_16085	3593598	3594439	-1	IS5 family transposase
				3573334	3598976	25642		HJ580_16090	3594699	3595322	-1	inovirus Gp2 family protein
				3573334	3598976	25642		HJ580_16095	3595550	3596959	-1	DUF3987 domain-containing protein
				3573334	3598976	25642		HJ580_16100	3597088	3597324	-1	AlpA family phage regulatory protein
				3573334	3598976	25642		HJ580_16105	3597431	3598441	-1	hypothetical protein
				3573334	3598976	25642		HJ580_16110	3598839	3598976	-1	cell filamentation protein Fic
GI25		3599208-3599232		3594501	3599281	4780		HJ580_16090	3594699	3595322	-1	inovirus Gp2 family protein
				3594501	3599281	4780		HJ580_16095	3595550	3596959	-1	DUF3987 domain-containing protein
				3594501	3599281	4780		HJ580_16100	3597088	3597324	-1	AlpA family phage regulatory protein
				3594501	3599281	4780		HJ580_16105	3597431	3598441	-1	hypothetical protein
				3594501	3599281	4780		HJ580_16110	3598839	3598976	-1	cell filamentation protein Fic
GI26	gypsy: 3845339-3845962	3834771-3834918		3821125	3856804	35679		HJ580_17085	3821125	3821739	1	YitT family protein
				3821125	3856804	35679		HJ580_17090	3821780	3822973	1	aspartate/tyrosine/aromatic aminotransferase
				3821125	3856804	35679	cas6f	HJ580_17095	3824967	3825521	-1	type I-F CRISPR-associated endoribonuclease Cas6/Csy4
				3821125	3856804	35679	csy3	HJ580_17100	3825526	3826578	-1	type I-F CRISPR-associated protein Csy3
				3821125	3856804	35679	csy2	HJ580_17105	3826595	3827548	-1	type I-F CRISPR-associated protein Csy2
				3821125	3856804	35679	csy1	HJ580_17110	3827545	3828882	-1	type I-F CRISPR-associated protein Csy1
				3821125	3856804	35679	cas3f	HJ580_17115	3829295	3832576	-1	type I-F CRISPR-associated helicase Cas3
				3821125	3856804	35679	cas1f	HJ580_17120	3832573	3833574	-1	type I-F CRISPR-associated endonuclease Cas1
				3821125	3856804	35679		HJ580_17125	3835514	3835681	1	hypothetical protein
				3821125	3856804	35679		HJ580_17130	3835912	3837582	-1	HAMP domain-containing protein
				3821125	3856804	35679		HJ580_17135	3838584	3840152	1	diguanylate cyclase
				3821125	3856804	35679		HJ580_17140	3840196	3840615	-1	YjbQ family protein
				3821125	3856804	35679	uvrA	HJ580_17145	3841038	3843869	-1	excinuclease ABC subunit UvrA
				3821125	3856804	35679		HJ580_17150	3844112	3844660	1	single-stranded DNA-binding protein
				3821125	3856804	35679		HJ580_17155	3844908	3846028	1	IS3 family transposase
				3821125	3856804	35679		HJ580_17160	3846265	3847614	1	RNA-directed DNA polymerase
				3821125	3856804	35679		HJ580_17165	3847607	3849649	1	RNA-directed DNA polymerase
				3821125	3856804	35679		HJ580_17170	3850375	3853530	-1	DEAD/DEAH box helicase
				3821125	3856804	35679		HJ580_17175	3853520	3854338	-1	DUF1837 domain-containing protein
				3821125	3856804	35679		HJ580_17180	3854697	3855272	-1	flavin reductase family protein
				3821125	3856804	35679		HJ580_17185	3855315	3855944	-1	NAD-dependent dehydratase
				3821125	3856804	35679		HJ580_17190	3856223	3856804	1	DUF4255 domain-containing protein
				3821125	3856804	35679		HJ580_17195	3856801	3857610	1	hypothetical protein
GI27		4168394-4168429		4161570	4169506	7936	tnpA	HJ580_18445	4161570	4162007	-1	IS200/IS605 family transposase
				4161570	4169506	7936		HJ580_18475	4167825	4168370	1	gamma carbonic anhydrase family protein
				4161570	4169506	7936		HJ580_18480	4168410	4168682	-1	DUF1488 domain-containing protein
				4161570	4169506	7936	aroE	HJ580_18485	4168679	4169506	-1	shikimate dehydrogenase
GI28				4234790	4239065	4275		HJ580_18905	4234790	4235074	-1	helix-turn-helix transcriptional regulator
				4234790	4239065	4275		HJ580_18910	4235064	4235147	-1	type II toxin-antitoxin system RelE/ParE family toxin
				4234790	4239065	4275		HJ580_18915	4235171	4235365	-1	transcriptional regulator
				4234790	4239065	4275		HJ580_18920	4235578	4235937	1	type II toxin-antitoxin system RelE/ParE family toxin
				4234790	4239065	4275		HJ580_18925	4235921	4236244	1	DNA-binding transcriptional regulator
				4234790	4239065	4275		HJ580_18930	4236448	4237731	-1	AAA family ATPase
				4234790	4239065	4275		HJ580_18935	4237954	4238274	-1	AAA family ATPase
				4234790	4239065	4275		HJ580_18940	4238705	4239065	-1	integrase
GI29	gypsy: 4449839-4450462			4448675	4456373	7698		HJ580_19850	4448931	4449326	-1	hypothetical protein
				4448675	4456373	7698		HJ580_19855	4449773	4450893	-1	IS3 family transposase
				4448675	4456373	7698		HJ580_19860	4451282	4451731	-1	hypothetical protein
				4448675	4456373	7698		HJ580_19865	4452007	4452294	-1	hypothetical protein
				4448675	4456373	7698		HJ580_19870	4452464	4452844	-1	hypothetical protein
				4448675	4456373	7698		HJ580_19875	4453042	4453389	-1	hypothetical protein
				4448675	4456373	7698		HJ580_19880	4453474	4453800	-1	DUF1311 domain-containing protein
				4448675	4456373	7698		HJ580_19885	4453995	4454342	-1	hypothetical protein
				4448675	4456373	7698		HJ580_19890	4454747	4455232	-1	hypothetical protein
				4448675	4456373	7698		HJ580_19895	4455436	4455786	-1	hypothetical protein
				4448675	4456373	7698		HJ580_19900	4455834	4456409	-1	ParB N-terminal domain-containing protein
GI30				4448931	4460404	11473		HJ580_19850	4448931	4449326	-1	hypothetical protein
				4448931	4460404	11473		HJ580_19855	4449773	4450893	-1	IS3 family transposase
				4448931	4460404	11473		HJ580_19860	4451282	4451731	-1	hypothetical protein
				4448931	4460404	11473		HJ580_19865	4452007	4452294	-1	hypothetical protein
				4448931	4460404	11473		HJ580_19870	4452464	4452844	-1	hypothetical protein
				4448931	4460404	11473		HJ580_19875	4453042	4453389	-1	hypothetical protein
				4448931	4460404	11473		HJ580_19880	4453474	4453800	-1	DUF1311 domain-containing protein
				4448931	4460404	11473		HJ580_19885	4453995	4454342	-1	hypothetical protein
				4448931	4460404	11473		HJ580_19890	4454747	4455232	-1	hypothetical protein
				4448931	4460404	11473		HJ580_19895	4455436	4455786	-1	hypothetical protein
				4448931	4460404	11473		HJ580_19900	4455834	4456409	-1	ParB N-terminal domain-containing protein
				4448931	4460404	11473		HJ580_19905	4456569	4458476	-1	hemolysin BL-binding protein
				4448931	4460404	11473		HJ580_19910	4458534	4458866	1	helix-turn-helix transcriptional regulator
				4448931	4460404	11473		HJ580_19915	4458874	4459131	-1	transcriptional regulator
				4448931	4460404	11473		HJ580_19920	4459230	4459550	1	helix-turn-helix transcriptional regulator
				4448931	4460404	11473		HJ580_19925	4459910	4460404	-1	hypothetical protein
GI31				4477437	4486634	9197		HJ580_19980	4477437	4478567	-1	phage tail protein
				4477437	4486634	9197		HJ580_19985	4478861	4479481	-1	tail fiber assembly protein
				4477437	4486634	9197		HJ580_19990	4479481	4480410	-1	phage tail protein
				4477437	4486634	9197		HJ580_19995	4480674	4481825	-1	phage tail protein
				4477437	4486634	9197		HJ580_20000	4482077	4482457	-1	phage tail protein
				4477437	4486634	9197		HJ580_20005	4482466	4483725	-1	phage tail protein
				4477437	4486634	9197		HJ580_20010	4484057	4484479	-1	tail fiber assembly protein
				4477437	4486634	9197		HJ580_20015	4484482	4485789	-1	phage tail protein
				4477437	4486634	9197		HJ580_20020	4486152	4486634	1	hypothetical protein

## Sheet: MS_2018
Supplementary Table 4. Genomic features, constituent genes and gene annotations of predicated GIs within MS_2018.
GI NO.	Transposon	Repeats	Prophage	Island start	Island end	Length	Symbol	Locus	Gene start	Gene end	Strand	Product
GI1				525034	542566	17532		HJ586_02450	525034	527244	-1	TonB-dependent siderophore receptor
				525034	542566	17532	fes	HJ586_02455	527556	528848	1	enterochelin esterase
				525034	542566	17532		HJ586_02460	528883	529101	1	MbtH family NRPS accessory protein
				525034	542566	17532		HJ586_02465	529302	537878	1	amino acid adenylation domain-containing protein
				525034	542566	17532		HJ586_02470	538361	539380	-1	IS110 family transposase
				525034	542566	17532		HJ586_02475	539609	540406	-1	ABC transporter ATP-binding protein
				525034	542566	17532	fepG	HJ586_02480	540454	541488	-1	iron-enterobactin ABC transporter permease
				525034	542566	17532	fepD	HJ586_02485	541499	542566	-1	Fe(3+)-siderophore ABC transporter permease
GI2				711127	730943	19816		HJ586_03195	711127	711243	1	hypothetical protein
				711127	730943	19816		HJ586_03200	711249	711815	1	hypothetical protein
				711127	730943	19816		HJ586_03205	712128	712568	-1	LysB family phage lysis regulatory protein
				711127	730943	19816		HJ586_03210	712565	713056	-1	glycoside hydrolase family 104 protein
				711127	730943	19816		HJ586_03215	713046	713357	-1	holin
				711127	730943	19816		HJ586_03220	713978	715255	1	pectate lyase
				711127	730943	19816		HJ586_03225	715329	716615	-1	cellulase family glycosylhydrolase
				711127	730943	19816		HJ586_03230	717108	717485	-1	cytochrome b562
				711127	730943	19816		HJ586_03235	717708	719144	-1	EmmdR/YeeO family multidrug/toxin efflux MATE transporter
				711127	730943	19816		HJ586_03240	719594	720013	1	VOC family protein
				711127	730943	19816	dsrB	HJ586_03245	720064	720264	1	protein DsrB
				711127	730943	19816		HJ586_03250	720302	722026	-1	HAMP domain-containing protein
				711127	730943	19816	flhD	HJ586_03255	723451	723801	1	flagellar transcriptional regulator FlhD
				711127	730943	19816	flhC	HJ586_03260	723804	724382	1	flagellar transcriptional regulator FlhC
				711127	730943	19816	motA	HJ586_03265	724516	725403	1	flagellar motor stator protein MotA
				711127	730943	19816	motB	HJ586_03270	725400	726530	1	flagellar motor protein MotB
				711127	730943	19816	cheA	HJ586_03275	726542	728584	1	chemotaxis protein CheA
				711127	730943	19816	cheW	HJ586_03280	728620	729117	1	chemotaxis protein CheW
				711127	730943	19816		HJ586_03285	729237	730943	1	HAMP domain-containing protein
GI3		1094524-1094554		1083074	1094982	11908		HJ586_04825	1083074	1083712	-1	DsbA family protein
				1083074	1094982	11908		HJ586_04830	1083921	1084205	-1	SDR family NAD(P)-dependent oxidoreductase
				1083074	1094982	11908		HJ586_04835	1084332	1084949	-1	FMN-dependent NADH-azoreductase
				1083074	1094982	11908		HJ586_04840	1085063	1085467	1	helix-turn-helix transcriptional regulator
				1083074	1094982	11908		HJ586_04845	1085720	1086202	1	glutathione peroxidase
				1083074	1094982	11908		HJ586_04850	1086333	1086479	-1	HNH endonuclease
				1083074	1094982	11908		HJ586_04855	1087278	1088459	1	hypothetical protein
				1083074	1094982	11908		HJ586_04860	1088518	1089132	1	hypothetical protein
				1083074	1094982	11908		HJ586_04865	1089145	1090443	1	ATP-grasp domain-containing protein
				1083074	1094982	11908		HJ586_04870	1090506	1092851	1	hypothetical protein
				1083074	1094982	11908		HJ586_04875	1092848	1093462	1	C26 family cysteine hydrolase domain-containing family
				1083074	1094982	11908		HJ586_04880	1093464	1094189	1	phosphocholine cytidylyltransferase family protein
				1083074	1094982	11908		HJ586_04885	1094833	1094982	1	helix-turn-helix domain-containing protein
				1083074	1094982	11908		HJ586_04890	1094979	1096019	1	LacI family DNA-binding transcriptional regulator
GI4				1283970	1288320	4350		HJ586_05710	1282745	1283989	1	xylanase
				1283970	1288320	4350		HJ586_05715	1284122	1284958	-1	AraC family transcriptional regulator
				1283970	1288320	4350		HJ586_05720	1285082	1285822	1	branched-chain amino acid ABC transporter permease
				1283970	1288320	4350		HJ586_05725	1285824	1286150	1	AzlD domain-containing protein
				1283970	1288320	4350		HJ586_05730	1286303	1286692	-1	hypothetical protein
				1283970	1288320	4350		HJ586_05735	1287165	1288772	1	site-specific integrase
GI5	gypsy:1288889-1289572;gypsy:1297930-1298442		P2: HJ586_05735-HJ586_05815	1285082	1306131	21049		HJ586_05720	1285082	1285822	1	branched-chain amino acid ABC transporter permease
				1285082	1306131	21049		HJ586_05725	1285824	1286150	1	AzlD domain-containing protein
				1285082	1306131	21049		HJ586_05730	1286303	1286692	-1	hypothetical protein
				1285082	1306131	21049		HJ586_05735	1287165	1288772	1	site-specific integrase
				1285082	1306131	21049		HJ586_05740	1288859	1289841	-1	IS3 family transposase
				1285082	1306131	21049		HJ586_05745	1289908	1290930	1	IS110 family transposase
				1285082	1306131	21049		HJ586_05750	1291153	1291269	-1	transposase
				1285082	1306131	21049		HJ586_05755	1291695	1294649	1	ATP-binding protein
				1285082	1306131	21049		HJ586_05760	1294813	1295118	-1	transposase
				1285082	1306131	21049		HJ586_05765	1295201	1296445	1	IS110 family transposase
				1285082	1306131	21049		HJ586_05770	1296624	1296800	-1	hypothetical protein
				1285082	1306131	21049		HJ586_05775	1296749	1296892	-1	hypothetical protein
				1285082	1306131	21049		HJ586_05780	1297088	1297354	-1	transposase
				1285082	1306131	21049		HJ586_05785	1297443	1297871	1	hypothetical protein
				1285082	1306131	21049		HJ586_05790	1297864	1298984	-1	IS3 family transposase
				1285082	1306131	21049		HJ586_05795	1299529	1300803	-1	RelA/SpoT domain-containing protein
				1285082	1306131	21049		HJ586_05800	1301189	1302000	1	IS3 family transposase
				1285082	1306131	21049		HJ586_05805	1302226	1303470	-1	IS110 family transposase
				1285082	1306131	21049		HJ586_05810	1303553	1303858	1	transposase
				1285082	1306131	21049		HJ586_05815	1303874	1304857	-1	integrase arm-type DNA-binding domain-containing protein
				1285082	1306131	21049	ychF	HJ586_05820	1305040	1306131	-1	redox-regulated ATPase YchF
GI6				1299529	1304857	5328		HJ586_05795	1299529	1300803	-1	RelA/SpoT domain-containing protein
				1299529	1304857	5328		HJ586_05800	1301189	1302000	1	IS3 family transposase
				1299529	1304857	5328		HJ586_05805	1302226	1303470	-1	IS110 family transposase
				1299529	1304857	5328		HJ586_05810	1303553	1303858	1	transposase
				1299529	1304857	5328		HJ586_05815	1303874	1304857	-1	integrase arm-type DNA-binding domain-containing protein
GI7		1368203-1368243		1359230	1370308	11078		HJ586_06040	1359230	1360669	1	serralysin family metalloprotease
				1359230	1370308	11078		HJ586_06045	1361084	1362520	1	serralysin family metalloprotease
				1359230	1370308	11078		HJ586_06050	1362762	1364630	-1	potassium transporter Kup
				1359230	1370308	11078	tnpA	HJ586_06055	1364921	1365379	-1	IS200/IS605 family transposase
				1359230	1370308	11078		HJ586_06060	1365588	1366283	-1	Expansin-YoaJ
				1359230	1370308	11078	tehA	HJ586_06065	1366578	1367546	-1	dicarboxylate transporter/tellurite-resistance protein TehA
				1359230	1370308	11078		HJ586_06070	1368291	1369295	1	acyltransferase family protein
				1359230	1370308	11078		HJ586_06075	1369398	1369742	1	MmcQ protein
				1359230	1370308	11078		HJ586_06080	1369883	1370308	1	hypothetical protein
				1365588	1370308	4720		HJ586_06060	1365588	1366283	-1	Expansin-YoaJ
				1365588	1370308	4720	tehA	HJ586_06065	1366578	1367546	-1	dicarboxylate transporter/tellurite-resistance protein TehA
				1365588	1370308	4720		HJ586_06070	1368291	1369295	1	acyltransferase family protein
				1365588	1370308	4720		HJ586_06075	1369398	1369742	1	MmcQ protein
				1365588	1370308	4720		HJ586_06080	1369883	1370308	1	hypothetical protein
GI8		1482903-1482951	P3: HJ586_06560-HJ586_06635	1472821	1485198	12377	yeaG	HJ586_06560	1472821	1474755	1	protein kinase YeaG
				1472821	1485198	12377		HJ586_06565	1474792	1476069	1	YeaH/YhbH family protein
				1472821	1485198	12377		HJ586_06570	1476162	1476557	-1	hypothetical protein
				1472821	1485198	12377		HJ586_06575	1476853	1477191	1	YebY family protein
				1472821	1485198	12377		HJ586_06580	1477594	1477800	1	hypothetical protein
				1472821	1485198	12377		HJ586_06585	1477976	1478230	-1	hypothetical protein
				1472821	1485198	12377		HJ586_06590	1478867	1479361	-1	glycoside hydrolase family 104 protein
				1472821	1485198	12377		HJ586_06595	1479345	1479668	-1	phage holin, lambda family
				1472821	1485198	12377		HJ586_06600	1479821	1480222	-1	hypothetical protein
				1472821	1485198	12377		HJ586_06605	1480224	1481032	-1	hypothetical protein
				1472821	1485198	12377		HJ586_06610	1481178	1481990	1	hypothetical protein
				1472821	1485198	12377		HJ586_06615	1482177	1482386	-1	VRR-NUC domain-containing protein
				1472821	1485198	12377		HJ586_06620	1482404	1483348	-1	hypothetical protein
				1472821	1485198	12377		HJ586_06625	1483462	1483632	-1	hypothetical protein
				1472821	1485198	12377		HJ586_06630	1483652	1483885	-1	DUF1364 family protein
				1472821	1485198	12377		HJ586_06635	1484048	1485198	1	IS3 family transposase
GI9				1572102	1576946	4844	citX	HJ586_07050	1571563	1572105	-1	citrate lyase holo-[acyl-carrier protein] synthase
				1572102	1576946	4844	citF	HJ586_07055	1572102	1573631	-1	citrate lyase subunit alpha
				1572102	1576946	4844	citE	HJ586_07060	1573722	1574612	-1	citrate (pro-3S)-lyase subunit beta
				1572102	1576946	4844	citD	HJ586_07065	1574612	1574902	-1	citrate lyase acyl carrier protein
				1572102	1576946	4844	citC	HJ586_07070	1574937	1575986	-1	[citrate (pro-3S)-lyase] ligase
				1572102	1576946	4844		HJ586_07075	1576062	1576946	-1	fumarylacetoacetate hydrolase family protein
GI10				1717566	1729432	11866		HJ586_07675	1717566	1718234	1	hypothetical protein
				1717566	1729432	11866		HJ586_07680	1718422	1718634	1	AlpA family phage regulatory protein
				1717566	1729432	11866		HJ586_07685	1718825	1719016	-1	DUF3950 domain-containing protein
				1717566	1729432	11866		HJ586_07690	1719206	1719406	1	host cell division inhibitor Icd-like protein
				1717566	1729432	11866		HJ586_07695	1719399	1719599	1	hypothetical protein
				1717566	1729432	11866		HJ586_07700	1719592	1722228	1	DUF927 domain-containing protein
				1717566	1729432	11866		HJ586_07705	1722273	1722434	1	hypothetical protein
				1717566	1729432	11866		HJ586_07710	1722641	1722970	1	hypothetical protein
				1717566	1729432	11866		HJ586_07715	1723117	1724331	-1	hypothetical protein
				1717566	1729432	11866		HJ586_07720	1724324	1725463	-1	nucleoid-associated protein
				1717566	1729432	11866		HJ586_07725	1726160	1726768	1	hypothetical protein
				1717566	1729432	11866		HJ586_07730	1726837	1727325	1	hypothetical protein
				1717566	1729432	11866		HJ586_07735	1727674	1727916	1	ABC transporter ATP-binding protein
				1717566	1729432	11866		HJ586_07740	1728273	1728842	1	hypothetical protein
				1717566	1729432	11866		HJ586_07745	1729205	1729432	1	hypothetical protein
GI11				1830117	1883388	53271		HJ586_08225	1830117	1832204	-1	discoidin domain-containing protein
				1830117	1883388	53271		HJ586_08230	1832292	1832639	-1	DUF3168 domain-containing protein
				1830117	1883388	53271	mtfA	HJ586_08240	1833213	1833989	1	DgsA anti-repressor MtfA
				1830117	1883388	53271		HJ586_08250	1834369	1835655	1	integrase arm-type DNA-binding domain-containing protein
				1830117	1883388	53271		HJ586_08255	1835850	1837232	-1	DHA2 family efflux MFS transporter permease subunit
				1830117	1883388	53271		HJ586_08260	1837512	1838168	1	NAD(P)H-binding protein
				1830117	1883388	53271		HJ586_08265	1838637	1839251	1	hypothetical protein
				1830117	1883388	53271		HJ586_08270	1839246	1839500	-1	hypothetical protein
				1830117	1883388	53271		HJ586_08275	1839961	1840155	1	hypothetical protein
				1830117	1883388	53271	pilV	HJ586_08280	1840274	1841776	-1	shufflon system plasmid conjugative transfer pilus tip adhesin PilV
				1830117	1883388	53271		HJ586_08285	1841959	1842360	1	H-NS histone family protein
				1830117	1883388	53271		HJ586_08290	1842487	1842741	1	MafI family immunity protein
				1830117	1883388	53271		HJ586_08295	1842954	1843238	-1	conjugal transfer protein TraD
				1830117	1883388	53271		HJ586_08300	1843235	1843492	-1	hypothetical protein
				1830117	1883388	53271		HJ586_08305	1843784	1844008	1	hypothetical protein
				1830117	1883388	53271		HJ586_08310	1844039	1844704	-1	hypothetical protein
				1830117	1883388	53271		HJ586_08315	1844926	1847052	-1	AAA family ATPase
				1830117	1883388	53271		HJ586_08320	1847120	1847502	-1	hypothetical protein
				1830117	1883388	53271		HJ586_08325	1847511	1848367	-1	hypothetical protein
				1830117	1883388	53271		HJ586_08330	1849188	1850498	1	MobA/MobL family protein
				1830117	1883388	53271		HJ586_08335	1850664	1851380	-1	hypothetical protein
				1830117	1883388	53271		HJ586_08340	1852007	1853872	1	hypothetical protein
				1830117	1883388	53271		HJ586_08345	1853943	1854599	-1	hypothetical protein
				1830117	1883388	53271		HJ586_08350	1854617	1855171	-1	membrane lipoprotein lipid attachment site-containing protein
				1830117	1883388	53271		HJ586_08355	1855843	1856038	1	hypothetical protein
				1830117	1883388	53271		HJ586_08360	1856307	1856675	-1	NUDIX domain-containing protein
				1830117	1883388	53271		HJ586_08365	1857072	1857857	-1	HNH endonuclease
				1830117	1883388	53271		HJ586_08370	1857950	1858414	-1	hypothetical protein
				1830117	1883388	53271		HJ586_08375	1858380	1858580	-1	hypothetical protein
				1830117	1883388	53271		HJ586_08380	1858652	1858972	-1	hypothetical protein
				1830117	1883388	53271		HJ586_08385	1859078	1859347	-1	hypothetical protein
				1830117	1883388	53271		HJ586_08390	1860257	1860991	1	DNA-binding protein
				1830117	1883388	53271		HJ586_08395	1861019	1861819	1	hypothetical protein
				1830117	1883388	53271		HJ586_08400	1862003	1862482	1	DUF4756 family protein
				1830117	1883388	53271		HJ586_08405	1862867	1863379	-1	GrpB family protein
				1830117	1883388	53271		HJ586_08410	1863487	1863741	-1	DNA-binding protein
				1830117	1883388	53271		HJ586_08415	1863805	1864170	-1	hypothetical protein
				1830117	1883388	53271		HJ586_08420	1864228	1864518	-1	hypothetical protein
				1830117	1883388	53271		HJ586_08425	1864593	1864925	-1	hypothetical protein
				1830117	1883388	53271		HJ586_08430	1864946	1865164	-1	AlpA family transcriptional regulator
				1830117	1883388	53271		HJ586_08435	1865356	1866231	-1	hypothetical protein
				1830117	1883388	53271		HJ586_08440	1866630	1866833	-1	hypothetical protein
				1830117	1883388	53271		HJ586_08445	1866817	1867203	-1	hypothetical protein
				1830117	1883388	53271		HJ586_08450	1867852	1868250	1	amidase
				1830117	1883388	53271		HJ586_08455	1868346	1869728	-1	APC family permease
				1830117	1883388	53271		HJ586_08460	1869873	1870706	-1	AraC family transcriptional regulator
				1830117	1883388	53271		HJ586_08465	1870885	1872024	1	ornithine cyclodeaminase
				1830117	1883388	53271		HJ586_08470	1872040	1872462	1	RidA family protein
				1830117	1883388	53271		HJ586_08475	1872484	1873776	1	FAD-binding oxidoreductase
				1830117	1883388	53271		HJ586_08480	1873820	1874731	-1	LysR family transcriptional regulator
				1830117	1883388	53271		HJ586_08485	1874828	1875814	1	NAD(P)H-binding protein
				1830117	1883388	53271		HJ586_08490	1876306	1876731	-1	hypothetical protein
				1830117	1883388	53271		HJ586_08495	1877014	1878015	-1	transketolase family protein
				1830117	1883388	53271		HJ586_08500	1878012	1878860	-1	transketolase
				1830117	1883388	53271		HJ586_08505	1878875	1879624	-1	glucose 1-dehydrogenase
				1830117	1883388	53271		HJ586_08510	1879669	1881000	-1	MFS transporter
				1830117	1883388	53271		HJ586_08515	1881325	1882245	1	LysR family transcriptional regulator
				1830117	1883388	53271		HJ586_08520	1882456	1883388	1	LysR family transcriptional regulator
				1830117	1883388	53271	mdcH	HJ586_08525	1883372	1884280	-1	malonate decarboxylase subunit epsilon
GI12				1937556	1942937	5381	citX	HJ586_08750	1937556	1938098	-1	citrate lyase holo-[acyl-carrier protein] synthase
				1937556	1942937	5381	citF	HJ586_08755	1938095	1939624	-1	citrate lyase subunit alpha
				1937556	1942937	5381	citE	HJ586_08760	1939714	1940604	-1	citrate (pro-3S)-lyase subunit beta
				1937556	1942937	5381	citD	HJ586_08765	1940604	1940893	-1	citrate lyase acyl carrier protein
				1937556	1942937	5381	citC	HJ586_08770	1940928	1941977	-1	[citrate (pro-3S)-lyase] ligase
				1937556	1942937	5381		HJ586_08775	1942053	1942937	-1	fumarylacetoacetate hydrolase family protein
GI13		1982904-1982943		1981003	1985503	4500		HJ586_08950	1981299	1983803	-1	hypothetical protein
				1981003	1985503	4500		HJ586_08955	1983856	1984383	-1	hypothetical protein
				1981003	1985503	4500		HJ586_08960	1984373	1985071	-1	hypothetical protein
				1981299	1986027	4728		HJ586_08950	1981299	1983803	-1	hypothetical protein
				1981299	1986027	4728		HJ586_08955	1983856	1984383	-1	hypothetical protein
				1981299	1986027	4728		HJ586_08960	1984373	1985071	-1	hypothetical protein
				1981299	1986027	4728		HJ586_08965	1985725	1986027	1	hypothetical protein
GI14	gypsy:2079795-2080199;gypsy:2085532-2085972	2045953-2045978	P4: HJ586_09150-HJ586_09225	2038722	2093697	54975		HJ586_09175	2038722	2039129	-1	DUF1795 domain-containing protein
				2038722	2093697	54975	tssI	HJ586_09180	2039143	2040996	-1	type VI secretion system tip protein VgrG
				2038722	2093697	54975		HJ586_09185	2041109	2041627	-1	Hcp family type VI secretion system effector
				2038722	2093697	54975		HJ586_09190	2042332	2042601	-1	helix-turn-helix domain-containing protein
				2038722	2093697	54975		HJ586_09195	2042735	2043007	1	helix-turn-helix transcriptional regulator
				2038722	2093697	54975		HJ586_09200	2043125	2043382	1	helix-turn-helix transcriptional regulator
				2038722	2093697	54975		HJ586_09205	2043878	2044072	1	AlpA family transcriptional regulator
				2038722	2093697	54975		HJ586_09210	2044089	2044673	1	DUF2857 domain-containing protein
				2038722	2093697	54975		HJ586_09215	2044663	2044872	1	TraR/DksA family transcriptional regulator
				2038722	2093697	54975		HJ586_09220	2045302	2046554	1	IS110 family transposase
				2038722	2093697	54975		HJ586_09225	2046835	2047713	-1	LysR family transcriptional regulator
				2038722	2093697	54975	eamB	HJ586_09230	2047818	2048405	1	cysteine/O-acetylserine transporter
				2038722	2093697	54975		HJ586_09235	2048505	2049515	-1	aldo/keto reductase
				2038722	2093697	54975		HJ586_09240	2049626	2050027	-1	winged helix-turn-helix transcriptional regulator
				2038722	2093697	54975		HJ586_09245	2050269	2051657	1	MFS transporter
				2038722	2093697	54975	chrA	HJ586_09250	2051802	2053013	-1	chromate efflux transporter
				2038722	2093697	54975		HJ586_09255	2053520	2053756	1	hypothetical protein
				2038722	2093697	54975		HJ586_09260	2053826	2054491	1	lytic transglycosylase domain-containing protein
				2038722	2093697	54975		HJ586_09265	2054494	2054769	1	TrbC/VirB2 family protein
				2038722	2093697	54975		HJ586_09270	2054780	2057527	1	ATPase
				2038722	2093697	54975		HJ586_09275	2057552	2058267	1	type IV secretion system protein VirB5
				2038722	2093697	54975		HJ586_09280	2058278	2058502	1	EexN family lipoprotein
				2038722	2093697	54975		HJ586_09285	2058514	2059542	1	type IV secretion system protein
				2038722	2093697	54975		HJ586_09290	2059630	2059770	1	hypothetical protein
				2038722	2093697	54975		HJ586_09295	2059763	2060445	1	type IV secretion system protein
				2038722	2093697	54975	virB9	HJ586_09300	2060445	2061335	1	P-type conjugative transfer protein VirB9
				2038722	2093697	54975		HJ586_09305	2061332	2062540	1	TrbI/VirB10 family protein
				2038722	2093697	54975	virB11	HJ586_09310	2062530	2063546	1	P-type DNA transfer ATPase VirB11
				2038722	2093697	54975		HJ586_09315	2063586	2063888	1	conjugal transfer protein
				2038722	2093697	54975		HJ586_09320	2064584	2066446	1	type IV secretion system DNA-binding domain-containing protein
				2038722	2093697	54975		HJ586_09325	2066455	2067201	1	molybdopterin-guanine dinucleotide biosynthesis protein MobC
				2038722	2093697	54975		HJ586_09330	2067513	2068160	-1	hypothetical protein
				2038722	2093697	54975		HJ586_09335	2068147	2068470	-1	DUF1778 domain-containing protein
				2038722	2093697	54975		HJ586_09340	2069443	2069757	-1	CcdB family protein
				2038722	2093697	54975		HJ586_09345	2069760	2069996	-1	type II toxin-antitoxin system CcdA family antitoxin
				2038722	2093697	54975		HJ586_09350	2070317	2071261	-1	DUF1738 domain-containing protein
				2038722	2093697	54975		HJ586_09355	2071967	2074276	1	ATPase
				2038722	2093697	54975		HJ586_09360	2074280	2075599	1	ATP-binding protein
				2038722	2093697	54975		HJ586_09365	2075596	2077794	1	DEAD/DEAH box helicase
				2038722	2093697	54975		HJ586_09370	2077952	2078263	-1	transposase
				2038722	2093697	54975		HJ586_09375	2078349	2079593	1	IS110 family transposase
				2038722	2093697	54975		HJ586_09380	2079771	2080289	-1	IS3 family transposase
				2038722	2093697	54975		HJ586_09385	2080367	2080633	-1	transposase
				2038722	2093697	54975		HJ586_09390	2080961	2081509	1	hypothetical protein
				2038722	2093697	54975		HJ586_09395	2081894	2082967	1	hypothetical protein
				2038722	2093697	54975		HJ586_09400	2083697	2084002	-1	transposase
				2038722	2093697	54975		HJ586_09405	2084085	2085330	1	IS110 family transposase
				2038722	2093697	54975		HJ586_09410	2085556	2086250	-1	IS3 family transposase
				2038722	2093697	54975		HJ586_09415	2086317	2087339	1	IS110 family transposase
				2038722	2093697	54975		HJ586_09420	2087562	2087678	-1	transposase
				2038722	2093697	54975		HJ586_09425	2087996	2089666	-1	hypothetical protein
				2038722	2093697	54975		HJ586_09430	2090472	2090576	1	hypothetical protein
				2038722	2093697	54975		HJ586_09435	2091038	2091194	1	molybdopterin-guanine dinucleotide biosynthesis protein MobC
				2038722	2093697	54975		HJ586_09440	2091191	2091505	-1	CcdB family protein
				2038722	2093697	54975		HJ586_09445	2091508	2091744	-1	type II toxin-antitoxin system CcdA family antitoxin
				2038722	2093697	54975		HJ586_09450	2091887	2092798	-1	LysR family transcriptional regulator
				2038722	2093697	54975		HJ586_09455	2092921	2093697	1	2OG-Fe dioxygenase family protein
				2077952	2086250	8298		HJ586_09370	2077952	2078263	-1	transposase
				2077952	2086250	8298		HJ586_09375	2078349	2079593	1	IS110 family transposase
				2077952	2086250	8298		HJ586_09380	2079771	2080289	-1	IS3 family transposase
				2077952	2086250	8298		HJ586_09385	2080367	2080633	-1	transposase
				2077952	2086250	8298		HJ586_09390	2080961	2081509	1	hypothetical protein
				2077952	2086250	8298		HJ586_09395	2081894	2082967	1	hypothetical protein
				2077952	2086250	8298		HJ586_09400	2083697	2084002	-1	transposase
				2077952	2086250	8298		HJ586_09405	2084085	2085330	1	IS110 family transposase
				2077952	2086250	8298		HJ586_09410	2085556	2086250	-1	IS3 family transposase
GI15				2115248	2119445	4197		HJ586_09555	2115353	2116222	-1	LysR family transcriptional regulator
				2115248	2119445	4197		HJ586_09560	2116325	2117281	1	nitronate monooxygenase
				2115248	2119445	4197		HJ586_09565	2117452	2117544	1	NAD(P)-binding domain-containing protein
				2115248	2119445	4197		HJ586_09570	2117774	2118229	-1	Lrp/AsnC family transcriptional regulator
				2115248	2119445	4197		HJ586_09575	2118351	2119295	1	DMT family transporter
				2115248	2119445	4197		HJ586_09580	2119413	2119760	1	HNH nuclease family protein
				2117452	2121652	4200		HJ586_09565	2117452	2117544	1	NAD(P)-binding domain-containing protein
				2117452	2121652	4200		HJ586_09570	2117774	2118229	-1	Lrp/AsnC family transcriptional regulator
				2117452	2121652	4200		HJ586_09575	2118351	2119295	1	DMT family transporter
				2117452	2121652	4200		HJ586_09580	2119413	2119760	1	HNH nuclease family protein
				2117452	2121652	4200		HJ586_09585	2120035	2120802	-1	AraC family transcriptional regulator
				2117452	2121652	4200		HJ586_09590	2120918	2121652	1	type 1 glutamine amidotransferase
				2124631	2129517	4886		HJ586_09610	2124631	2124936	-1	antibiotic biosynthesis monooxygenase
				2124631	2129517	4886		HJ586_09615	2124998	2126014	-1	NADP-dependent oxidoreductase
				2124631	2129517	4886		HJ586_09620	2126106	2127008	1	LysR family transcriptional regulator
				2124631	2129517	4886		HJ586_09625	2127630	2127929	1	hypothetical protein
				2124631	2129517	4886		HJ586_09630	2128321	2129517	1	dienelactone hydrolase
GI16				2630427	2640804	10377	moeB	HJ586_11730	2630427	2631512	1	molybdopterin-synthase adenylyltransferase MoeB
				2630427	2640804	10377		HJ586_11735	2631528	2631788	1	MoaD/ThiS family protein
				2630427	2640804	10377		HJ586_11740	2631791	2632375	1	hypothetical protein
				2630427	2640804	10377		HJ586_11745	2632372	2633205	1	DUF692 family protein
				2630427	2640804	10377		HJ586_11750	2633244	2635766	1	hypothetical protein
				2630427	2640804	10377		HJ586_11755	2635726	2636061	1	hypothetical protein
				2630427	2640804	10377		HJ586_11760	2636257	2637408	1	YcaO-like family protein
				2630427	2640804	10377		HJ586_11765	2637412	2638080	1	hypothetical protein
				2630427	2640804	10377		HJ586_11770	2638083	2639420	1	MFS transporter
				2630427	2640804	10377		HJ586_11775	2639442	2640002	1	GNAT family N-acetyltransferase
				2630427	2640804	10377		HJ586_11780	2640016	2640804	1	aspartyl/asparaginyl beta-hydroxylase domain-containing protein
GI17		2649569-2649593		2644129	2651596	7467		HJ586_11800	2644129	2645815	1	HAMP domain-containing protein
				2644129	2651596	7467		HJ586_11805	2646021	2646770	-1	transposase
				2644129	2651596	7467		HJ586_11810	2646837	2647859	1	IS110 family transposase
				2644129	2651596	7467		HJ586_11815	2648509	2649441	1	hypothetical protein
				2644129	2651596	7467		HJ586_11820	2650298	2651596	-1	tyrosine-type recombinase/integrase
				2646563	2651782	5219		HJ586_11805	2646021	2646770	-1	transposase
				2646563	2651782	5219		HJ586_11810	2646837	2647859	1	IS110 family transposase
				2646563	2651782	5219		HJ586_11815	2648509	2649441	1	hypothetical protein
				2646563	2651782	5219		HJ586_11820	2650298	2651596	-1	tyrosine-type recombinase/integrase
				2646563	2651782	5219	mutS	HJ586_11825	2651756	2654314	1	DNA mismatch repair protein MutS
GI18		2843674-2843704;2882633-2882665	P5: HJ586_12655-HJ586_12715	2840577	2883829	43252	nadK	HJ586_12660	2840577	2841455	1	NAD(+) kinase
				2840577	2883829	43252	recN	HJ586_12665	2841539	2843200	1	DNA repair protein RecN
				2840577	2883829	43252	bamE	HJ586_12670	2843312	2843656	1	outer membrane protein assembly factor BamE
				2840577	2883829	43252		HJ586_12675	2843728	2844021	-1	RnfH family protein
				2840577	2883829	43252		HJ586_12680	2844014	2844448	-1	type II toxin-antitoxin system RatA family toxin
				2840577	2883829	43252	smpB	HJ586_12685	2844604	2845086	1	SsrA-binding protein SmpB
				2840577	2883829	43252		HJ586_12695	2845705	2846952	1	integrase
				2840577	2883829	43252		HJ586_12700	2847156	2847632	-1	hypothetical protein
				2840577	2883829	43252		HJ586_12705	2847690	2848643	-1	DUF4365 domain-containing protein
				2840577	2883829	43252		HJ586_12710	2848752	2849483	-1	hypothetical protein
				2840577	2883829	43252		HJ586_12715	2849688	2852204	-1	S8 family peptidase
				2840577	2883829	43252		HJ586_12720	2852244	2853419	-1	AAA family ATPase
				2840577	2883829	43252		HJ586_12725	2854178	2855425	-1	hypothetical protein
				2840577	2883829	43252		HJ586_12730	2855586	2855798	1	AlpA family phage regulatory protein
				2840577	2883829	43252		HJ586_12735	2855974	2857518	1	DUF3987 domain-containing protein
				2840577	2883829	43252		HJ586_12740	2857911	2858546	-1	inovirus Gp2 family protein
				2840577	2883829	43252		HJ586_12745	2859137	2859571	1	hypothetical protein
				2840577	2883829	43252		HJ586_12750	2859593	2860141	1	hypothetical protein
				2840577	2883829	43252		HJ586_12755	2860155	2860328	1	hypothetical protein
				2840577	2883829	43252		HJ586_12760	2860359	2860799	1	hypothetical protein
				2840577	2883829	43252		HJ586_12765	2860876	2861697	1	DUF945 domain-containing protein
				2840577	2883829	43252		HJ586_12770	2861789	2862244	1	antirestriction protein
				2840577	2883829	43252	radC	HJ586_12775	2862255	2862734	1	DNA repair protein RadC
				2840577	2883829	43252		HJ586_12780	2862779	2863111	1	type IV toxin-antitoxin system YeeU family antitoxin
				2840577	2883829	43252		HJ586_12785	2863122	2863316	1	hypothetical protein
				2840577	2883829	43252		HJ586_12790	2863362	2863715	1	toxin
				2840577	2883829	43252		HJ586_12795	2863980	2864894	-1	hypothetical protein
				2840577	2883829	43252		HJ586_12800	2865132	2865890	-1	TatD family deoxyribonuclease
				2840577	2883829	43252		HJ586_12805	2865887	2867152	-1	hypothetical protein
				2840577	2883829	43252		HJ586_12810	2867149	2867958	-1	hypothetical protein
				2840577	2883829	43252		HJ586_12815	2867958	2869835	-1	NTPase KAP
				2840577	2883829	43252		HJ586_12820	2869897	2871672	-1	ATP-dependent helicase
				2840577	2883829	43252		HJ586_12825	2871669	2873420	-1	AAA family ATPase
				2840577	2883829	43252		HJ586_12830	2874033	2874335	1	toxin
				2840577	2883829	43252		HJ586_12835	2874662	2875870	1	tyrosine-type recombinase/integrase
				2840577	2883829	43252		HJ586_12840	2875912	2877810	-1	ATP-dependent helicase
				2840577	2883829	43252		HJ586_12845	2877807	2879579	-1	AAA family ATPase
				2840577	2883829	43252		HJ586_12850	2880143	2880613	1	MEKHLA domain-containing protein
				2840577	2883829	43252		HJ586_12855	2881524	2882306	1	transporter substrate-binding domain-containing protein
				2840577	2883829	43252		HJ586_12860	2882567	2882860	1	zinc-ribbon domain-containing protein
				2840577	2883829	43252		HJ586_12865	2882897	2883829	-1	nucleoside recognition family protein
GI19				2938291	2963234	24943		HJ586_13095	2938291	2940186	1	polysaccharide biosynthesis protein
				2938291	2963234	24943		HJ586_13100	2940795	2941781	-1	methyltransferase domain-containing protein
				2938291	2963234	24943		HJ586_13105	2942172	2943296	-1	glycosyltransferase
				2938291	2963234	24943		HJ586_13110	2943565	2944446	-1	NAD-dependent epimerase/dehydratase family protein
				2938291	2963234	24943	gmd	HJ586_13115	2944448	2945488	-1	GDP-mannose 4,6-dehydratase
				2938291	2963234	24943		HJ586_13120	2945507	2947786	-1	glycosyltransferase
				2938291	2963234	24943		HJ586_13125	2947783	2948799	-1	glycosyltransferase
				2938291	2963234	24943		HJ586_13130	2948800	2949705	-1	glycosyltransferase family 4 protein
				2938291	2963234	24943		HJ586_13135	2950679	2951632	-1	hypothetical protein
				2938291	2963234	24943		HJ586_13140	2951629	2952234	-1	histidine phosphatase family protein
				2938291	2963234	24943		HJ586_13145	2952273	2953457	-1	glycosyltransferase family 4 protein
				2938291	2963234	24943		HJ586_13150	2953454	2954695	-1	glycosyltransferase
				2938291	2963234	24943	wecB	HJ586_13155	2954655	2955782	-1	UDP-N-acetylglucosamine 2-epimerase (non-hydrolyzing)
				2938291	2963234	24943		HJ586_13160	2955779	2957344	-1	polysaccharide deacetylase
				2938291	2963234	24943		HJ586_13165	2957341	2958714	-1	phenylacetate--CoA ligase family protein
				2938291	2963234	24943		HJ586_13170	2958722	2959480	-1	ABC transporter ATP-binding protein
				2938291	2963234	24943		HJ586_13175	2959482	2960330	-1	ABC transporter permease
				2938291	2963234	24943		HJ586_13180	2960444	2961808	-1	phosphomannomutase CpsG
				2938291	2963234	24943		HJ586_13185	2961822	2963234	-1	mannose-1-phosphate guanylyltransferase/mannose-6-phosphate isomerase
GI20				3044285	3059046	14761		HJ586_13605	3044242	3044556	-1	toxin
				3044285	3059046	14761	radC	HJ586_13610	3044620	3045093	-1	DNA repair protein RadC
				3044285	3059046	14761		HJ586_13615	3045124	3045945	-1	DUF945 domain-containing protein
				3044285	3059046	14761		HJ586_13620	3046032	3046898	-1	GTPase family protein
				3044285	3059046	14761		HJ586_13625	3047375	3050347	1	type I restriction endonuclease subunit R
				3044285	3059046	14761		HJ586_13630	3050373	3051587	1	restriction endonuclease subunit S
				3044285	3059046	14761		HJ586_13635	3051584	3052369	1	hypothetical protein
				3044285	3059046	14761		HJ586_13640	3052366	3055536	1	DEAD/DEAH box helicase
				3044285	3059046	14761		HJ586_13645	3055536	3056714	1	AAA family ATPase
				3044285	3059046	14761		HJ586_13650	3056711	3058318	1	type I restriction-modification system subunit M
				3044285	3059046	14761		HJ586_13655	3058391	3059014	-1	inovirus Gp2 family protein
GI21				3044620	3062936	18316	radC	HJ586_13610	3044620	3045093	-1	DNA repair protein RadC
				3044620	3062936	18316		HJ586_13615	3045124	3045945	-1	DUF945 domain-containing protein
				3044620	3062936	18316		HJ586_13620	3046032	3046898	-1	GTPase family protein
				3044620	3062936	18316		HJ586_13625	3047375	3050347	1	type I restriction endonuclease subunit R
				3044620	3062936	18316		HJ586_13630	3050373	3051587	1	restriction endonuclease subunit S
				3044620	3062936	18316		HJ586_13635	3051584	3052369	1	hypothetical protein
				3044620	3062936	18316		HJ586_13640	3052366	3055536	1	DEAD/DEAH box helicase
				3044620	3062936	18316		HJ586_13645	3055536	3056714	1	AAA family ATPase
				3044620	3062936	18316		HJ586_13650	3056711	3058318	1	type I restriction-modification system subunit M
				3044620	3062936	18316		HJ586_13655	3058391	3059014	-1	inovirus Gp2 family protein
				3044620	3062936	18316		HJ586_13660	3059242	3060651	-1	DUF3987 domain-containing protein
				3044620	3062936	18316		HJ586_13665	3060788	3061024	-1	AlpA family phage regulatory protein
				3044620	3062936	18316		HJ586_13670	3061298	3062086	-1	hypothetical protein
				3044620	3062936	18316		HJ586_13675	3062239	3062385	1	hypothetical protein
				3044620	3062936	18316		HJ586_13680	3062382	3062936	-1	cell filamentation protein Fic
				3055536	3062385	6849		HJ586_13645	3055536	3056714	1	AAA family ATPase
				3055536	3062385	6849		HJ586_13650	3056711	3058318	1	type I restriction-modification system subunit M
				3055536	3062385	6849		HJ586_13655	3058391	3059014	-1	inovirus Gp2 family protein
				3055536	3062385	6849		HJ586_13660	3059242	3060651	-1	DUF3987 domain-containing protein
				3055536	3062385	6849		HJ586_13665	3060788	3061024	-1	AlpA family phage regulatory protein
				3055536	3062385	6849		HJ586_13670	3061298	3062086	-1	hypothetical protein
				3055536	3062385	6849		HJ586_13675	3062239	3062385	1	hypothetical protein
				3055536	3062385	6849		HJ586_13680	3062382	3062936	-1	cell filamentation protein Fic
GI22				3221869	3244009	22140		HJ586_14400	3221869	3222726	-1	hypothetical protein
				3221869	3244009	22140		HJ586_14405	3223037	3223381	-1	Dabb family protein
				3221869	3244009	22140		HJ586_14410	3223547	3224029	1	Lrp/AsnC family transcriptional regulator
				3221869	3244009	22140		HJ586_14415	3224207	3225013	-1	hypothetical protein
				3221869	3244009	22140		HJ586_14420	3225234	3225647	1	hypothetical protein
				3221869	3244009	22140		HJ586_14425	3225794	3226420	-1	hypothetical protein
				3221869	3244009	22140		HJ586_14430	3227028	3227366	1	hypothetical protein
				3221869	3244009	22140		HJ586_14435	3227563	3228417	-1	pirin family protein
				3221869	3244009	22140		HJ586_14440	3228832	3229557	1	methyltransferase domain-containing protein
				3221869	3244009	22140		HJ586_14445	3229678	3231117	-1	GGDEF domain-containing protein
				3221869	3244009	22140		HJ586_14450	3231689	3232105	1	hypothetical protein
				3221869	3244009	22140		HJ586_14455	3232198	3233943	-1	hypothetical protein
				3221869	3244009	22140		HJ586_14460	3233945	3236923	-1	histidine kinase
				3221869	3244009	22140		HJ586_14465	3236904	3238082	-1	DNA cytosine methyltransferase
				3221869	3244009	22140		HJ586_14470	3238236	3238559	-1	hypothetical protein
				3221869	3244009	22140		HJ586_14475	3238707	3239075	-1	transposase
				3221869	3244009	22140		HJ586_14480	3239101	3240345	1	IS110 family transposase
				3221869	3244009	22140		HJ586_14485	3240571	3241378	-1	transposase
				3221869	3244009	22140	lptG	HJ586_14495	3241819	3242889	-1	LPS export ABC transporter permease LptG
				3221869	3244009	22140	lptF	HJ586_14500	3242891	3244009	-1	LPS export ABC transporter permease LptF
GI23				3667429	3674314	6885		HJ586_16425	3667429	3668076	1	YitT family protein
				3667429	3674314	6885		HJ586_16430	3668199	3668723	-1	DUF3237 domain-containing protein
				3667429	3674314	6885		HJ586_16435	3669174	3670208	1	alpha/beta hydrolase
				3667429	3674314	6885		HJ586_16440	3670618	3671462	1	IS5 family transposase
				3667429	3674314	6885		HJ586_16445	3671569	3672312	-1	HNH endonuclease
				3667429	3674314	6885		HJ586_16450	3672309	3673481	-1	AAA family ATPase
				3667429	3674314	6885		HJ586_16455	3673595	3674314	-1	hypothetical protein
GI24				3698915	3716006	17091		HJ586_16560	3698915	3700141	1	tyrosine-type recombinase/integrase
				3698915	3716006	17091		HJ586_16565	3700225	3700542	1	helix-turn-helix transcriptional regulator
				3698915	3716006	17091		HJ586_16570	3700562	3700822	-1	transcriptional regulator
				3698915	3716006	17091		HJ586_16575	3700921	3701259	1	helix-turn-helix transcriptional regulator
				3698915	3716006	17091		HJ586_16580	3701452	3703455	-1	AAA family ATPase
				3698915	3716006	17091		HJ586_16585	3703452	3704333	-1	DNA-binding protein
				3698915	3716006	17091		HJ586_16590	3705240	3705498	1	transcriptional regulator
				3698915	3716006	17091		HJ586_16595	3705525	3706517	1	restriction endonuclease
				3698915	3716006	17091		HJ586_16600	3706838	3708559	1	type I restriction-modification system subunit M
				3698915	3716006	17091		HJ586_16605	3708573	3709850	1	restriction endonuclease subunit S
				3698915	3716006	17091		HJ586_16610	3709847	3711124	1	FRG domain-containing protein
				3698915	3716006	17091		HJ586_16615	3711121	3714270	1	type I restriction endonuclease subunit R
				3698915	3716006	17091		HJ586_16620	3714687	3716006	-1	type II toxin-antitoxin system HipA family toxin
GI25				3970003	3978400	8397		HJ586_17745	3970003	3970566	1	stress resistance protein
				3970003	3978400	8397		HJ586_17750	3970799	3971287	-1	hypothetical protein
				3970003	3978400	8397		HJ586_17755	3971644	3972951	1	phage tail protein
				3970003	3978400	8397		HJ586_17760	3972954	3973376	1	tail fiber assembly protein
				3970003	3978400	8397		HJ586_17765	3973710	3975110	1	phage tail protein
				3970003	3978400	8397		HJ586_17770	3975418	3976530	1	phage tail protein
				3970003	3978400	8397		HJ586_17775	3976785	3977780	1	phage tail protein
				3970003	3978400	8397		HJ586_17780	3977780	3978400	1	tail fiber assembly protein
GI26		4001622-4001693		3996251	4004633	8382		HJ586_17825	3988156	3996789	1	filamentous hemagglutinin N-terminal domain-containing protein
				3996251	4004633	8382		HJ586_17830	3996837	3997187	1	hypothetical protein
				3996251	4004633	8382		HJ586_17835	3997391	3997876	1	hypothetical protein
				3996251	4004633	8382		HJ586_17840	3998281	3998628	1	hypothetical protein
				3996251	4004633	8382		HJ586_17845	3998823	3999149	1	DUF1311 domain-containing protein
				3996251	4004633	8382		HJ586_17850	3999234	3999581	1	hypothetical protein
				3996251	4004633	8382		HJ586_17855	3999779	4000159	1	hypothetical protein
				3996251	4004633	8382		HJ586_17860	4000329	4000616	1	hypothetical protein
				3996251	4004633	8382		HJ586_17865	4000892	4001341	1	hypothetical protein
				3996251	4004633	8382		HJ586_17870	4001727	4002089	1	hypothetical protein
				3996251	4004633	8382		HJ586_17875	4002213	4002632	1	SMI1/KNR4 family protein
				3996251	4004633	8382		HJ586_17880	4002715	4002993	1	hypothetical protein
				3996251	4004633	8382		HJ586_17885	4003279	4003542	1	hypothetical protein
				3996251	4004633	8382		HJ586_17890	4003981	4004376	1	hypothetical protein
				3996837	4004376	7539		HJ586_17830	3996837	3997187	1	hypothetical protein
				3996837	4004376	7539		HJ586_17835	3997391	3997876	1	hypothetical protein
				3996837	4004376	7539		HJ586_17840	3998281	3998628	1	hypothetical protein
				3996837	4004376	7539		HJ586_17845	3998823	3999149	1	DUF1311 domain-containing protein
				3996837	4004376	7539		HJ586_17850	3999234	3999581	1	hypothetical protein
				3996837	4004376	7539		HJ586_17855	3999779	4000159	1	hypothetical protein
				3996837	4004376	7539		HJ586_17860	4000329	4000616	1	hypothetical protein
				3996837	4004376	7539		HJ586_17865	4000892	4001341	1	hypothetical protein
				3996837	4004376	7539		HJ586_17870	4001727	4002089	1	hypothetical protein
				3996837	4004376	7539		HJ586_17875	4002213	4002632	1	SMI1/KNR4 family protein
				3996837	4004376	7539		HJ586_17880	4002715	4002993	1	hypothetical protein
				3996837	4004376	7539		HJ586_17885	4003279	4003542	1	hypothetical protein
				3996837	4004376	7539		HJ586_17890	4003981	4004376	1	hypothetical protein
GI27		4332794-4332867		4324153	4403203	79050		HJ586_19405	4324153	4328340	1	type IV secretion protein Rhs
				4324153	4403203	79050		HJ586_19410	4328352	4328942	1	hypothetical protein
				4324153	4403203	79050		HJ586_19415	4329946	4330764	1	sugar-binding protein
				4324153	4403203	79050		HJ586_19420	4330764	4331240	1	phosphotriesterase
				4324153	4403203	79050		HJ586_19425	4331462	4331845	1	GIY-YIG nuclease family protein
				4324153	4403203	79050		HJ586_19430	4331842	4332324	1	phosphotriesterase
				4324153	4403203	79050		HJ586_19435	4332382	4332657	1	RHS repeat-associated core domain-containing protein
				4324153	4403203	79050		HJ586_19440	4332644	4332889	-1	hypothetical protein
				4324153	4403203	79050		HJ586_19445	4333049	4333135	1	IS3 family transposase
				4324153	4403203	79050		HJ586_19450	4333284	4334792	1	sigma-54-dependent Fis family transcriptional regulator
				4324153	4403203	79050		HJ586_19455	4334884	4336680	-1	DNA-binding domain-containing protein
				4324153	4403203	79050		HJ586_19460	4336994	4337962	1	hypothetical protein
				4324153	4403203	79050		HJ586_19465	4338084	4338443	1	DUF3742 family protein
				4324153	4403203	79050		HJ586_19470	4338450	4339973	-1	conjugal transfer protein TraG
				4324153	4403203	79050		HJ586_19475	4339985	4340335	-1	hypothetical protein
				4324153	4403203	79050		HJ586_19480	4340332	4341729	-1	integrating conjugative element protein
				4324153	4403203	79050		HJ586_19485	4341740	4342675	-1	TIGR03756 family integrating conjugative element protein
				4324153	4403203	79050		HJ586_19490	4342672	4343040	-1	TIGR03757 family integrating conjugative element protein
				4324153	4403203	79050		HJ586_19495	4343282	4343893	1	hypothetical protein
				4324153	4403203	79050		HJ586_19500	4343886	4344905	1	nucleotidyl transferase AbiEii/AbiGii toxin family protein
				4324153	4403203	79050		HJ586_19505	4344889	4347750	-1	conjugative transfer ATPase
				4324153	4403203	79050		HJ586_19510	4347750	4348187	-1	TIGR03751 family conjugal transfer lipoprotein
				4324153	4403203	79050		HJ586_19515	4348168	4349568	-1	TIGR03752 family integrating conjugative element protein
				4324153	4403203	79050		HJ586_19520	4349558	4350454	-1	TIGR03749 family integrating conjugative element protein
				4324153	4403203	79050		HJ586_19525	4350451	4351131	-1	TIGR03746 family integrating conjugative element protein
				4324153	4403203	79050		HJ586_19530	4351128	4351526	-1	TIGR03750 family conjugal transfer protein
				4324153	4403203	79050		HJ586_19535	4351539	4351898	-1	TIGR03745 family integrating conjugative element membrane protein
				4324153	4403203	79050		HJ586_19540	4351917	4352150	-1	TIGR03758 family integrating conjugative element protein
				4324153	4403203	79050		HJ586_19545	4352147	4352527	-1	hypothetical protein
				4324153	4403203	79050		HJ586_19550	4352956	4353696	1	hypothetical protein
				4324153	4403203	79050		HJ586_19555	4353886	4354401	1	hypothetical protein
				4324153	4403203	79050		HJ586_19560	4354599	4355348	-1	TIGR03747 family integrating conjugative element membrane protein
				4324153	4403203	79050	traD	HJ586_19565	4355345	4357504	-1	type IV conjugative transfer system coupling protein TraD
				4324153	4403203	79050		HJ586_19570	4357509	4358048	-1	integrating conjugative element protein
				4324153	4403203	79050		HJ586_19575	4358045	4358635	-1	transglycosylase SLT domain-containing protein
				4324153	4403203	79050		HJ586_19580	4358617	4359324	-1	TIGR03759 family integrating conjugative element protein
				4324153	4403203	79050		HJ586_19585	4359336	4359986	-1	hypothetical protein
				4324153	4403203	79050		HJ586_19590	4359983	4360543	-1	integrating conjugative element protein pill, pfgi-1
				4324153	4403203	79050		HJ586_19595	4361109	4362242	1	HNH endonuclease
				4324153	4403203	79050		HJ586_19600	4362380	4363263	-1	hypothetical protein
				4324153	4403203	79050		HJ586_19605	4363359	4364141	-1	AAA family ATPase
				4324153	4403203	79050		HJ586_19610	4364138	4365160	-1	IS21 family transposase
				4324153	4403203	79050		HJ586_19615	4365519	4366232	1	hypothetical protein
				4324153	4403203	79050		HJ586_19620	4366281	4368560	-1	DEAD/DEAH box helicase family protein
				4324153	4403203	79050		HJ586_19625	4368690	4369799	-1	class I SAM-dependent methyltransferase
				4324153	4403203	79050		HJ586_19630	4369870	4370514	-1	hypothetical protein
				4324153	4403203	79050		HJ586_19635	4370625	4370969	-1	hypothetical protein
				4324153	4403203	79050		HJ586_19640	4371060	4371722	-1	DUF3275 family protein
				4324153	4403203	79050		HJ586_19645	4371805	4372698	-1	DUF3577 domain-containing protein
				4324153	4403203	79050		HJ586_19650	4373204	4373569	-1	DUF3085 domain-containing protein
				4324153	4403203	79050		HJ586_19655	4373718	4374515	-1	GTPase
				4324153	4403203	79050		HJ586_19660	4375040	4375798	-1	class I SAM-dependent methyltransferase
				4324153	4403203	79050		HJ586_19665	4375799	4376998	-1	MFS transporter
				4324153	4403203	79050		HJ586_19670	4376995	4378044	-1	ThiF family adenylyltransferase
				4324153	4403203	79050		HJ586_19675	4378953	4379204	-1	DNA cytosine methyltransferase
				4324153	4403203	79050		HJ586_19680	4379730	4381742	-1	DNA topoisomerase III
				4324153	4403203	79050		HJ586_19685	4382214	4382852	-1	NAD(P)H-binding protein
				4324153	4403203	79050		HJ586_19690	4383198	4383551	-1	helix-turn-helix transcriptional regulator
				4324153	4403203	79050		HJ586_19695	4383682	4384107	-1	SnoaL-like domain-containing protein
				4324153	4403203	79050		HJ586_19700	4384717	4384818	-1	single-stranded DNA-binding protein
				4324153	4403203	79050		HJ586_19705	4384909	4385439	-1	DUF3158 family protein
				4324153	4403203	79050		HJ586_19710	4385436	4386254	-1	TIGR03761 family integrating conjugative element protein
				4324153	4403203	79050		HJ586_19715	4386438	4387652	-1	hypothetical protein
				4324153	4403203	79050		HJ586_19720	4387652	4388212	-1	DUF2857 domain-containing protein
				4324153	4403203	79050		HJ586_19725	4388224	4389948	-1	ParB family protein
				4324153	4403203	79050		HJ586_19730	4389956	4390210	-1	type II toxin-antitoxin system HicA family toxin
				4324153	4403203	79050		HJ586_19735	4390194	4390901	-1	ParA family protein
				4324153	4403203	79050		HJ586_19740	4390935	4391147	-1	AlpA family phage regulatory protein
				4324153	4403203	79050		HJ586_19745	4391289	4392317	1	DDE-type integrase/transposase/recombinase
				4324153	4403203	79050		HJ586_19750	4392475	4392705	-1	thioredoxin family protein
				4324153	4403203	79050		HJ586_19755	4392719	4393720	-1	permease
				4324153	4403203	79050		HJ586_19760	4393925	4394434	-1	sigma-70 family RNA polymerase sigma factor
				4324153	4403203	79050		HJ586_19765	4394904	4395257	1	metalloregulator ArsR/SmtB family transcription factor
				4324153	4403203	79050		HJ586_19770	4395315	4395794	1	arsenate reductase ArsC
				4324153	4403203	79050	arsD	HJ586_19775	4395817	4396182	1	arsenite efflux transporter metallochaperone ArsD
				4324153	4403203	79050	arsA	HJ586_19780	4396203	4397972	1	arsenical pump-driving ATPase
				4324153	4403203	79050		HJ586_19785	4398013	4399302	1	arsenic transporter
				4324153	4403203	79050	arsC	HJ586_19790	4399360	4399788	1	glutaredoxin-dependent arsenate reductase
				4324153	4403203	79050		HJ586_19795	4399861	4400370	1	arsenate reductase ArsC
				4324153	4403203	79050	arsH	HJ586_19800	4400481	4401206	1	arsenical resistance protein ArsH
				4324153	4403203	79050	crcB	HJ586_19805	4401444	4401797	-1	fluoride efflux transporter CrcB
				4324153	4403203	79050	eno	HJ586_19810	4401914	4403203	-1	phosphopyruvate hydratase
GI28	gypsy:4552706-4553389			4543211	4560697	17486		HJ586_20390	4543211	4543438	1	hypothetical protein
				4543211	4560697	17486		HJ586_20395	4543492	4544310	1	nucleotidyltransferase domain-containing protein
				4543211	4560697	17486		HJ586_20400	4544571	4545173	1	hypothetical protein
				4543211	4560697	17486		HJ586_20405	4545180	4546484	1	nucleotide sugar dehydrogenase
				4543211	4560697	17486		HJ586_20410	4546488	4547744	1	hypothetical protein
				4543211	4560697	17486		HJ586_20415	4547741	4548202	1	NUDIX domain-containing protein
				4543211	4560697	17486		HJ586_20420	4548154	4549377	1	hypothetical protein
				4543211	4560697	17486		HJ586_20425	4549370	4550521	1	DegT/DnrJ/EryC1/StrS aminotransferase family protein
				4543211	4560697	17486		HJ586_20430	4550508	4551431	1	hypothetical protein
				4543211	4560697	17486		HJ586_20435	4551435	4552331	1	hypothetical protein
				4543211	4560697	17486		HJ586_20440	4552676	4553658	-1	IS3 family transposase
				4543211	4560697	17486		HJ586_20445	4553725	4554747	1	IS110 family transposase
				4543211	4560697	17486		HJ586_20450	4554970	4555086	-1	transposase
				4543211	4560697	17486		HJ586_20455	4555276	4556043	1	DedA family protein
				4543211	4560697	17486	ilvN	HJ586_20460	4556105	4556398	-1	acetolactate synthase small subunit
				4543211	4560697	17486	ilvB	HJ586_20465	4556402	4558066	-1	acetolactate synthase large subunit
				4543211	4560697	17486		HJ586_20470	4558179	4558280	-1	ilvB operon leader peptide IvbL
				4543211	4560697	17486	thiQ	HJ586_20475	4558411	4559103	-1	thiamine ABC transporter ATP-binding protein ThiQ
				4543211	4560697	17486	thiP	HJ586_20480	4559087	4560697	-1	thiamine/thiamine pyrophosphate ABC transporter permease ThiP
				4543211	4560697	17486		HJ586_20485	4560673	4561656	-1	thiamine ABC transporter substrate binding subunit
GI29				4673901	4679717	5816		HJ586_20955	4673901	4675454	-1	phage tail sheath family protein
				4673901	4679717	5816		HJ586_20960	4675577	4676386	-1	hypothetical protein
				4673901	4679717	5816		HJ586_20965	4676383	4676964	-1	DUF4255 domain-containing protein
				4673901	4679717	5816		HJ586_20970	4677198	4677662	1	hypothetical protein
				4673901	4679717	5816		HJ586_20975	4677707	4678294	-1	hypothetical protein
				4673901	4679717	5816		HJ586_20980	4678470	4679099	1	NAD-dependent dehydratase
				4673901	4679717	5816		HJ586_20985	4679142	4679717	1	flavin reductase family protein
